# Supplementary material for: Dasatinib and quercetin senolytic treatment delays early onset intervertebral disc degeneration in SM/J mice
Source: Bone Res. 2026 Apr 14;14:42. doi: 10.1038/s41413-026-00526-4 (PMC13076796; doi:10.1038/s41413-026-00526-4)
Supplement: Supplementary file 11 — Supplementary File 1 [file 41413_2026_526_MOESM11_ESM.xlsx]

## Sheet: Suppl. Table 1.1
Supplementary Table 1.1 Compbio outputs based on the upregulated DEGs from microarray on NP tissues; 17wk vs 4wk
Theme	Flavin-containing MonoOxygenases			EPH-Ephrin signaling			IL1 and megakaryocytes in obesity			COL17A1-related bullous pemphigoid associated			Beta-galactoside alpha-2,6-sialyltransferase activity			Phosphorylation of Cx43 by c-src			CX3C chemokine receptor 1
Thematic Enrichment Score	76697.9			71745.2			67852.2			65810.6			59258.8			56296.8			50017.7
Coordinates in 3-D Space	X: 15.44,Y:-11.89,Z: 32.88			X: 14.21,Y: 29.70,Z:-30.15			X: 38.12,Y:-21.55,Z: -6.37			X: 38.02,Y: 17.65,Z: 0.43			X:-36.45,Y: 15.61,Z: 22.13			X: 27.13,Y: 10.92,Z:-29.26			X: 13.00,Y:-21.91,Z: -7.65
Entity Total	52			25			17			30			14			30			60
Concept Total	17			3			18			32			8			8			14
Pvalue	0.07			0.068			0.028			0.002			0.006			0.011			0.013
NEScore	1.198			1.19			1.238			1.346			1.291			1.262			1.244
Entity (gene)	Entity/Concept		Enrichment Score	Entity/Concept		Enrichment Score	Entity/Concept		Enrichment Score	Entity/Concept		Enrichment Score	Entity/Concept		Enrichment Score	Entity/Concept		Enrichment Score	Entity/Concept		Enrichment Score
Concept	fmo5	9.51987	734.118957	epha1	11.8367	3657.676462	itga2b	10.3996	1350.783938	dst	10.9197	1937.113472	st3gal6	10.8674	1868.180577	gja4	11.1408	2257.920025	cr2	9.40254	676.779646
	vdr	8.51719	366.378118	epha4	11.3573	2623.621999	gp9	9.85552	926.419154	dsc1	7.40394	169.358327	st6gal2	10.1126	1107.152271	gje1	9.58923	770.276858	cxcl13	9.09427	546.573966
	cyp2c70	8.38299	333.835100	epha6	10.1853	1164.326065	dpm1	9.65288	805.018068	tgm5	6.79694	111.194036	fut9	9.59089	771.161106	tpbpb	6.35267	81.723142	glycam1	7.20072	147.106398
	slc51a	8.07743	270.115809	sema4f	4.98975	31.773467	thpo	9.07696	540.052773	tgm1	6.48605	89.638611	glycam1	8.6105	390.856477	prl3a1	5.85017	57.686923	ccr7	6.41713	85.457370
	sult2a1	7.64462	200.105269	plxnc1	4.67323	25.514142	prl7a1	5.82	56.493116	pkp1	6.47744	89.105642	st8sia3	8.40484	338.928353	odam	5.4742	44.452798	cxcr3	6.30807	79.235261
	akr1c19	7.10601	137.759910	pfdn5	4.24038	18.900923	cd33	5.62564	49.372547	krtap9-3	4.5289	23.085229	pigz	7.10147	137.326536	prl2b1	5.35267	40.861571	ccl22	6.07974	67.636801
	akr1c12	6.99129	127.229498	rgma	3.80174	13.945618	ermap	4.73443	26.619897	krtap3-3	4.42724	21.514506	lgals3	6.64288	99.932503	f2rl2	5.28192	38.906100	ccl6	5.27928	38.834878
	cyp1b1	6.59065	96.379194	gabra1	3.63655	12.436870	mafg	4.27414	19.348415	mrgprx1	4.20777	18.478370	prg4	4.31819	19.948296	prl7c1	5.28016	38.858434	icam1	5.20376	36.854228
	ugt1a1	6.48318	89.460525	grina	3.27468	9.677778	il3ra	3.62372	12.326766	arrdc3	3.95651	15.524861	cd209a	4.06152	16.697072	cryba1	5.24874	38.021456	itga7	5.13033	35.025433
	sult1a1	6.27231	77.295491	mcam	2.81747	7.049238	stag2	3.07979	8.454926	mmp19	3.73568	13.321489	golgb1	3.66299	12.666874	slc1a2	4.48693	22.423426	il3ra	5.09102	34.083855
	gstm1	6.25246	76.239260	alcam	2.79813	6.955386	ms4a7	2.93042	7.623312	arhgef40	3.70048	13.000320	alcam	3.44064	10.857669	epha4	4.41613	21.349440	ccl21a	4.94226	30.744481
	gstt1	6.16689	71.848563	angptl1	2.57807	5.971395	clrn1	2.63639	6.217730	krtap4-8	3.69452	12.946807	cd33	2.01885	4.052618	mlc1	4.31263	19.871448	cd274	4.79038	27.672490
	gstt2	5.76753	54.475280	clk1	2.56829	5.931047	f2rl2	2.40256	5.287422	krtap19-5	3.69452	12.946807	trf	2.0182	4.050780	prl3b1	4.09054	17.036254	cxcl15	4.5423	23.300669
	ces2c	5.6401	49.869896	smox	2.40281	5.288325	pim1	2.31669	4.981886	krtap9-1	3.69452	12.946807	irak2	1.62574	3.086003	prl5a1	3.8472	14.392013	nphs1	4.53174	23.130713
	slco1a1	5.56933	47.482614	sp110	2.31248	4.967355	cblb	2.12653	4.366656	krtap19-2	3.27949	9.710105	sialylation	1.89471	3.718474	pkp1	3.74114	13.371940	itgb1bp1	4.26147	19.179249
	sult1b1	5.28362	38.951824	wnt7a	2.24995	4.756657	il9	2.05532	4.156364	sprr2d	3.18112	9.070127	sialyltransferase	1.9829	3.952862	prl2c2	3.64957	12.549580	odam	4.15501	17.814822
	sult1c2	5.19401	36.606072	vegfa	2.24077	4.726486	klk12	1.58672	3.003655	sprr2e	3.00647	8.035949	3-sialyltransferase	2.19	4.563057	dst	3.62057	12.299856	nova1	3.90909	15.022887
	fgf11	5.08218	33.875707	gap43	2.03587	4.100711	megakaryocytes	1.9217	3.788689	psmb8	3.00535	8.029720	6-sialyltransferase	2.27117	4.827159	epha1	3.36806	10.324930	akap7	3.81715	14.095400
	mgst2	5.00802	32.178389	axl	1.98418	3.956366	megakaryocytes	1.94819	3.858892	krtap7-1	2.88717	7.398175	beta-galactoside	2.33148	5.033203	nexn	3.26521	9.614487	ccl21b	3.70256	13.019139
	mafg	4.75264	26.958014	nnmt	1.93705	3.829227	megakaryocytic	2.07523	4.214112	odam	2.88332	7.378467	fucosyltransferase	2.33404	5.042163	ednrb	3.26388	9.605626	il9	3.67188	12.745194
	ugt2b35	4.63461	24.840241	snx9	1.88948	3.705024	thrombopoietin	2.08947	4.255931	sprr2b	2.655	6.298447	glycosylation-dependent	2.36178	5.140058	dsc1	3.24821	9.501872	cd33	3.56245	11.814201
	sult3a1	4.54279	23.308634	gria3	1.79504	3.470239	iiia	2.20228	4.602069	sprr2f	2.30927	4.956311	2-linked	2.79518	6.941158	gap43	2.79091	6.920640	itga2b	3.42588	10.747110
	gpx4	4.30399	19.752842	angptl3	1.62885	3.092667	thrombocytopenic	2.26987	4.822781	il3ra	2.23269	4.700093				wasl	2.68366	6.424818	lgals3	3.30406	9.876899
	gpx1	4.25941	19.151874	gabrb2	1.60909	3.050604	myeloproliferative	2.28532	4.874728	gap43	2.04917	4.138669				wtip	2.66617	6.347428	endou	3.1793	9.058682
	aldh1a7	4.20746	18.474399	dsc1	1.60128	3.034114	thrombocytosis	2.37233	5.177783	cd274	2.04278	4.120398				ccl21a	2.51978	5.734957	tlr4	3.08192	8.467392
	dhdh	3.77099	13.651501				iib	2.42051	5.353592	pnpla2	2.03613	4.101433				whrn	1.98149	3.949003	cd69	3.0502	8.283284
	abca1	3.69921	12.988904				bernard-soulier	2.42847	5.383220	lce1b	2.03538	4.099303				aqp3	1.97756	3.938278	mcam	2.9649	7.807687
	gpx6	3.67345	12.759044				thrombocythemia	2.43756	5.417253	sprr2i	1.95756	3.884042				plac1	1.91804	3.779105	il7	2.94047	7.676630
	mt2	3.61825	12.280057				polycythemia	2.44341	5.439249	krtap20-2	1.95756	3.884042				alcam	1.73984	3.339974	vegfa	2.93897	7.668647
	ugt3a1	3.48898	11.227637				vera	2.46532	5.522487	dnajb6	1.76634	3.401892				mmp20	1.7185	3.290945	mrc1	2.83532	7.137008
	nnmt	3.47992	11.157362				extramedullary	2.48367	5.593196	bullous	2.07215	4.205115				connexin	2.09409	4.269564	il19	2.73403	6.653095
	hsd3b1	3.44597	10.897844				glanzmann	2.58369	5.994706	pemphigoid	2.08922	4.255166				connexins	2.14787	4.431724	gpnmb	2.59424	6.038692
	inmt	3.41927	10.698026				thrombasthenia	2.60355	6.077808	blisters	2.10026	4.287870				junctional	2.2503	4.757814	ncr1	2.43508	5.407955
	cox20	3.36263	10.286135				anisocytosis	2.67382	6.381151	subepidermal	2.14171	4.412860				cx43	2.30192	4.931138	pkhd1l1	2.43138	5.394077
	gstt4	3.32825	10.043882				ib-ix-v	2.83236	7.122384	blister	2.21673	4.648374				junction-mediated	2.36191	5.140504	acap1	2.43072	5.391619
	sod1	3.23404	9.408981							dermatosis	2.27531	4.841007				segmentally	2.64727	6.264806	lamp3	2.29754	4.916183
	aldh8a1	3.22114	9.325205							bullosa	2.31549	4.977732				omit	2.80342	6.980925	tnfsf15	2.28489	4.873286
	cox6a1	3.01655	8.092280							tense	2.3456	5.082719				matrix-cell	2.87915	7.357174	ifit3	2.26425	4.804059
	ncor2	2.95047	7.730008							epidermolysis	2.36234	5.142044							epha1	2.20058	4.596643
	cox8c	2.79283	6.929858							herpetiformis	2.41442	5.331039							irf1	2.19253	4.571060
	scara3	2.47217	5.548766							xvii	2.41765	5.343003							tnfrsf18	2.18335	4.542075
	gm5592	2.19831	4.589409							hemidesmosomes	2.43231	5.397574							il10ra	2.16983	4.499699
	gm4884	2.19831	4.589409							pruritus	2.43678	5.414315							dst	2.14498	4.422853
	xrcc3	2.03887	4.109234							hemidesmosomes	2.43821	5.419675							tns4	2.12184	4.352481
	mt-nd2	1.98135	3.948636							hemidesmosome	2.48095	5.582631							ifi44	2.00112	4.003101
	cyp4a32	1.90549	3.746353							urticarial	2.49127	5.622730							il15ra	1.973	3.925830
	mt-nd3	1.90237	3.738267							intraepidermal	2.5245	5.753741							hbegf	1.96362	3.900395
	cox7b2	1.82907	3.553091							keratin	2.53339	5.789290							il17re	1.95172	3.868364
	mt-nd6	1.81285	3.513347							eczematous	2.55266	5.867139							epha4	1.86789	3.649979
	ppp4r4	1.79837	3.478282							intermediate_filaments	2.59272	6.032367							col12a1	1.84895	3.602375
	smox	1.62754	3.089849							acantholytic	2.62271	6.159056							isg20	1.81468	3.517823
	cyp2c66	1.61335	3.059606							lichenoid	2.75018	6.728030							col4a3	1.79702	3.475012
	xenobiotic	2.11886	4.343491							buttocks	2.75434	6.747424							rarres2	1.77483	3.421972
	xenobiotics	2.17596	4.518860							subcorneal	2.75554	6.753042							mmp11	1.75643	3.378617
	cytochrome	2.18158	4.536496							buttocks	2.75777	6.763489							aqp3	1.66541	3.172030
	fxr	2.20003	4.594903							laminin-5	2.76087	6.778066							cd209a	1.65051	3.139454
	pxr	2.21072	4.629071							musculorum	2.7807	6.871868							gbp2	1.63762	3.111524
	detoxification	2.22847	4.686355							nonbullous	2.85381	7.229079							defb4	1.62324	3.080663
	monooxygenases	2.41098	5.318361							ptt	3.02475	8.138443							mmp19	1.61694	3.067234
	shp	2.45101	5.467990							fulminans	3.02802	8.156890							alcam	1.59855	3.028380
	chenodeoxycholic	2.46927	5.537620							lichenification	3.03524	8.197792							venules	2.05322	4.150326
	lithocholic	2.50948	5.694160							synephrine	3.06544	8.371244							venules	2.07355	4.209221
	flavin-containing	2.53715	5.804418																dendritic_follicular	2.11373	4.328082
	aldo-keto	2.5568	5.883999																chemokine	2.15269	4.446551
	fmo	2.56314	5.909920																chemokines	2.22275	4.667818
	hydrocarbons	2.57536	5.960193																tertiary_lymphoid	2.34669	5.086570
	lrh-1	2.63674	6.219268																histiocytes	2.45525	5.484065
	fxra	2.80304	6.979088																histiocytes	2.45722	5.491582
	gss	2.82724	7.097154																interdigitating	2.46427	5.518468
																			venule	2.47679	5.566576
																			compartmentalization	2.5315	5.781735
																			angioimmunoblastic	2.55407	5.872883
																			integrins	2.56059	5.899478
																			cx3c	2.90993	7.515818

## Sheet: Suppl. Table 1.2
Supplementary Table 1.2 Compbio outputs based on the upregulated DEGs from microarray on AF tissues; 17wk vs 4wk
Theme	Ubiquitination of Securin by phospho-APC/C:Cdc20 complex			Heparan sulfate 2-O-sulfotransferase activity			CDK1 phosphorylates condensin I			Procollagen C-endopeptidase activity			Transcription of E2F targets under negative control by p107 and p130 (RBL2 in complex with HDAC1			Abnormal epiphyseal ossification			Fibrodysplasia ossificans progressiva			Procollagen-lysine 5-dioxygenase activity			Joint laxity			Articular capsule of glenohumeral joint			Cdk regulation of dna replication			TNFR1-induced NFkappaB signaling pathway			Proton-dependent peptide secondary active transmembrane transporter activity			CAK-mediated phosphorylation of Cyclin A:Cdc2 complexes			Chaperonin-containing T-complex
Thematic Enrichment Score	269446			237288			225495			173365			166602			132590			122093			81546.1			78598.1			78448.3			78017			72457.1			66387.6			63729			62672.8
Coordinates in 3-D Space	X: 15.75,Y: 29.55,Z: 26.65			X:-29.98,Y: 21.03,Z: 8.89			X: 18.04,Y: 27.62,Z: 28.01			X:-18.60,Y: 28.77,Z:-10.62			X: 30.52,Y: 9.71,Z:-28.29			X:-31.88,Y: 28.24,Z: 2.98			X:-22.77,Y: 31.64,Z:-14.89			X: -2.93,Y: 23.52,Z: 36.81			X:-29.74,Y: 28.80,Z:-11.35			X:-25.46,Y: 31.10,Z:-14.66			X: 18.56,Y: 35.21,Z: 12.25			X:-24.45,Y: -1.42,Z: 37.37			X: 40.68,Y:-16.41,Z: -0.67			X: 21.43,Y: 32.65,Z: 18.60			X: 0.58,Y: 2.19,Z: 40.62
Entity Total	109			133			115			130			131			46			52			41			40			20			65			18			28			112			57
Concept Total	6			31			3			14			4			20			14			4			11			22			6			4			4			2			3
Pvalue	<0.001			<0.001			<0.001			<0.001			<0.001			<0.001			<0.001			<0.001			<0.001			<0.001			<0.001			<0.001			<0.001			<0.001			<0.001
NEScore	3.18			3.005			3.026			3.149			3.113			2.735			2.634			2.065			2.028			2.06			2.086			2.145			2.198			2.176			2.174
Entity (gene)	Entity/Concept		Enrichment Score	Entity/Concept		Enrichment Score	Entity/Concept		Enrichment Score	Entity/Concept		Enrichment Score	Entity/Concept		Enrichment Score	Entity/Concept		Enrichment Score	Entity/Concept		Enrichment Score	Entity/Concept		Enrichment Score	Entity/Concept		Enrichment Score	Entity/Concept		Enrichment Score	Entity/Concept		Enrichment Score	Entity/Concept		Enrichment Score	Entity/Concept		Enrichment Score	Entity/Concept		Enrichment Score	Entity/Concept		Enrichment Score
Concept	cdc20	11.3304	2575.015259	hs2st1	9.49593	722.036492	smc2	11.0273	2087.073734	tnc	9.1683	575.350583	rbl1	12.1012	4393.675152	col2a1	9.9831	1012.072168	tnmd	10.9593	1991.022768	plod2	11.4274	2754.124622	eln	9.78994	885.247493	sla	11.6386	3188.291899	cdk2	9.66006	809.033564	tnfrsf1a	12.3337	5162.088890	slc36a1	10.0733	1077.378106	cdk1	11.335	2583.336049	tcp1	10.5474	1496.489232
	pttg1	11.2248	2393.268988	ndst1	9.01635	517.837207	ncapg	10.891	1898.908167	pcolce	9.15941	571.815619	e2f3	10.3748	1327.793250	matn3	9.57819	764.402078	acvr1	10.3668	1320.437177	plod1	11.1518	2275.262163	efemp2	9.50113	724.646693	zdhhc2	8.67064	407.495570	cdk1	9.51591	732.107173	ripk1	10.3531	1307.963015	slc26a11	9.89841	954.371624	cdk2	8.3596	328.466482	cct2	10.1355	1124.856540
	plk1	11.0563	2129.514623	col2a1	8.94712	493.573827	ncaph	10.6868	1648.295505	col18a1	8.76146	433.972041	e2f8	9.94791	987.685477	slc26a2	9.47373	711.012489	nog	8.79494	444.161032	lox	7.94333	246.138342	pycr1	9.4193	684.686671	nog	6.47891	89.195929	cdkn1a	7.98423	253.217230	ripk3	8.97627	503.646632	slc9a5	9.59388	772.760613	ccnb2	7.56435	189.276950	uggt1	8.95229	495.344814
	mxd3	9.15997	572.040958	slc35b2	8.40339	338.588089	ncapd2	10.6587	1616.547817	bmp1	7.76712	217.839882	cdk2	8.46116	352.421933	col9a2	9.0302	522.830859	fmod	7.59868	193.833753	slc25a11	7.89736	238.419186	aldh18a1	8.38536	334.384589	hhat	5.79596	55.559511	rbbp8	7.74976	215.233094	tnfrsf10b	6.91482	120.661183	slc15a4	9.282	622.531583	ccnb1	7.4869	179.383434	pdia5	7.93305	244.390923
	espl1	9.13237	561.198458	sdc1	8.29949	315.061937	ncapg2	10.5165	1464.816385	serpinh1	7.58	191.340678	mybl2	7.82298	226.438433	ebp	8.79929	445.502759	tnc	7.57173	190.246998	bgn	6.61699	98.155308	arhgap31	7.86528	233.177214	mras	5.76509	54.383333	plk1	7.46634	176.845115	adam17	6.31378	79.549234	appbp2	9.21017	592.293727	cdkn3	7.22372	149.470799	casq1	7.90615	239.877194
	bub1	8.84359	459.394689	mmp13	8.17601	289.217625	top2b	9.56416	757.003931	col15a1	7.49064	179.848803	cdc6	7.68084	205.193524	chst3	7.88249	235.975520	col5a1	7.25311	152.547107	papss2	6.57207	95.145828	wdr35	7.4668	176.900923	xkr5	4.97759	31.506690	cks2	7.29769	157.334609	nfkb1	5.64803	50.144903	slc26a1	8.40087	337.998088	cdkn1a	6.87955	117.747248	tmx1	7.28104	155.528802
	cdk1	8.42375	343.400453	sulf1	7.99723	255.508954	lcorl	9.37096	662.126747	lox	7.45546	175.515688	atad2	7.48755	179.464434	fgfr3	7.57638	190.861739	col3a1	6.89662	119.148372	col15a1	6.11735	69.423450	kif22	7.38447	167.088802	cxcl14	4.67615	25.565914	cdkn2c	7.28607	156.072526	ticam1	4.90011	29.859429	slc26a2	8.08126	270.833458	ccna2	6.82239	113.173553	dnajb11	7.27856	155.261572
	ube2c	8.28679	312.299910	papss2	7.91664	241.627329	top2a	9.13541	562.383175	col5a1	7.29631	157.183488	skp2	7.13191	140.255544	papss2	7.34561	162.647684	col1a1	6.68798	103.105696	fkbp10	5.9945	63.756521	obsl1	6.97759	126.026760	strap	4.27952	19.420613	cdc6	7.28545	156.004857	trem1	4.73714	26.669968	slc7a5	8.04061	263.307922	cdc20	6.73995	106.887376	edem1	7.10971	138.113794
	prc1	8.25618	305.744526	chst3	7.83905	228.975840	kif4	8.62858	395.786821	col1a1	7.22579	149.685236	cdkn1a	6.95147	123.766044	zdhhc2	7.27285	154.648547	sla	6.68482	102.880272	alkbh1	5.87936	58.865763	limk1	6.42726	86.059283	chst3	4.00009	16.000970	cdc20	7.21697	148.772917	il1rap	3.71881	13.166593	gpr68	7.7224	211.189855	cks2	6.6878	103.093156	cabp1	6.95437	124.015018
	anapc1	8.06991	268.710497	sdc3	7.5708	190.124304	pttg1	8.59066	385.520255	col3a1	7.20814	147.865731	ccne2	6.85327	115.621887	col11a1	6.99971	127.974222	bgn	6.44071	86.865253	col5a1	5.78509	55.142474	chst14	6.35832	82.043698	ssr2	3.9079	15.010505	mastl	7.04501	132.056255	myd88	3.53243	11.570874	slc9b1	7.42281	171.589047	plk1	6.54491	93.371614	ganab	6.83208	113.935789
	aurkb	7.79921	222.739469	arsb	7.06307	133.719553	ercc6l	7.87297	234.422463	col1a2	7.17651	144.658624	ccne1	6.82162	113.112563	wdr35	6.98635	126.795081	mmp3	5.9224	60.648696	col1a2	5.77514	54.763520	plod1	6.16582	71.795176	degs1	3.06216	8.352211	ccnb1	7.00945	128.841329	tlr2	2.92584	7.599184	slc16a3	7.21648	148.722932	fscn1	6.32455	80.145539	txndc5	6.59953	96.974507
	nek2	7.77139	218.484780	chst14	6.98434	126.618543	incenp	7.78277	220.215214	col11a1	7.15807	142.821613	ptpn12	6.59411	96.610912	slc10a7	6.70005	103.972077	eln	5.75383	53.960454	pcolce	5.62511	49.354667	sla	6.07026	67.194127	mmp3	2.88136	7.368446	cdt1	6.85453	115.722921	map3k7	2.78548	6.894684	slc7a6	6.64655	100.186871	cdc6	6.31288	79.499699	prdx4	6.46749	88.492910
	incenp	7.35467	163.672510	cspg4	6.96272	124.735101	bub1	7.78216	220.121441	h2-ab1	6.95808	124.334567	cdk1	6.3927	84.022230	creld2	6.50611	90.893691	postn	5.63487	49.689476	tnc	5.42666	43.011842	rai1	5.94408	61.566931	gsto1	2.25047	4.758391	skp2	6.74264	107.087077	itm2a	2.43118	5.393328	slc37a3	6.43465	86.501113	ccne2	6.28634	78.050961	sil1	6.21355	74.210322
	net1	7.35096	163.252863	matn3	6.92033	121.123381	cenpa	7.6501	200.866939	bgn	6.92145	121.216998	polr1e	6.38638	83.654766	sumf1	6.16599	71.803919	col1a2	5.56247	47.257330	serpinh1	5.41191	42.574141	igfbp7	5.93274	61.084625	mmp13	2.07381	4.209979	net1	6.6099	97.673685	nucb2	2.2932	4.901410	slc7a1	5.61368	48.965054	prc1	6.18394	72.702995	uggt2	6.1138	69.252552
	cenpu	7.24078	151.248812	slc35b3	6.88211	117.956465	wdhd1	7.54324	186.526919	plod2	6.91483	120.662355	sertad3	6.34653	81.375746	nsdhl	6.14995	71.009822	mmp13	5.46248	44.093165	flot2	5.19732	36.690073	col5a1	5.42868	43.071941	tnc	2.03156	4.088457	pttg1	6.52288	91.956613	map3k1	2.21855	4.654247	cnnm4	5.61205	48.909752	nek2	5.91829	60.475841	sec61a1	6.04979	66.247391
	sass6	7.22669	149.779166	cilp	6.86871	116.866207	ndc80	7.39312	168.093915	postn	6.9116	120.392583	ccna2	6.071	67.228319	chst14	6.12369	69.729165	strap	5.34536	40.654958	col1a1	5.09993	34.295163	col6a1	4.8645	29.131410	aatf	1.93959	3.835955	rbl1	6.48657	89.671023	casp2	2.02018	4.056339	slco3a1	5.2984	39.352852	stmn1	5.83565	57.109332	ebp	5.94732	61.705185
	mastl	7.18665	145.679209	mmp3	6.86437	116.514923	cdc20	7.24973	152.190407	col6a1	6.89848	119.302579	mcm3	5.77414	54.725418	slc26a1	6.0312	65.399003	lox	5.3401	40.507018	col6a1	4.98375	31.641531	emilin1	4.56251	23.629412	col2a1	1.83176	3.559714	prc1	6.46699	88.462151	birc5	1.91563	3.772774	slc37a4	4.72901	26.519954	bub1	5.81239	56.195908	calu	5.93153	61.033491
	ccnb1	7.16748	143.756517	sox5	6.84148	114.680855	aurkb	7.20075	147.110253	col6a3	6.77045	109.171185	cdkn2c	5.76638	54.431704	col27a1	5.89705	59.592301	col2a1	5.29598	39.287063	col3a1	4.866	29.161723	slc10a7	4.53814	23.233657	ucma	1.76444	3.397415	rrm2	6.17504	72.255961	mmp3	1.79728	3.475653	slc20a2	4.70667	26.112594	pttg1	5.67194	50.982721	prdx1	5.24529	37.930485
	ndc80	7.0914	136.371670	hapln1	6.79496	111.041811	aspm	7.17972	144.981473	col6a2	6.65639	100.872906	melk	5.64377	49.997080	tapt1	5.77954	54.930614	adamts14	5.0438	32.986328	dlat	4.72992	26.536691	abcc6	4.43788	21.673816	dysf	1.67931	3.202756	dtl	6.11487	69.304390	tnfr1	1.78613	3.448896	slc1a1	4.46014	22.010750	top2a	5.55072	46.874175	wdr1	5.18548	36.390237
	trip13	6.99168	127.263692	bgn	6.76357	108.652151	lap3	7.05205	132.702046	fmod	6.58225	95.819626	myc	5.63565	49.716255	pex5	5.71699	52.600012	col11a1	5.03541	32.795165	idh1	4.42295	21.450729	col6a2	4.31032	19.839755	plod1	1.62622	3.087026	ect2	6.10104	68.642867	tnfr1-mediated	1.87513	3.668350	wnk4	3.49839	11.301117	mybl2	5.55027	46.859670	atl3	5.17128	36.033848
	kif23	6.98409	126.596174	ucma	6.34643	81.370428	cdca2	6.94026	122.808004	plod1	6.52593	92.151430	cdca3	5.55487	47.009244	trpv4	5.43647	43.305276	cxcl14	4.59623	24.188120	col6a2	4.29297	19.602559	lox	4.25491	19.092171	slap	1.84051	3.581370	mcm4	5.63997	49.865374	tnfr2	1.90247	3.738523	slc25a11	3.20294	9.208318	birc5	5.28606	39.017700	eif2b1	5.11894	34.749976
	skp2	6.85527	115.782404	extl2	6.15118	71.070737	cenpi	6.85044	115.395346	adamts14	6.51172	91.247811	ccnb2	5.53835	46.473873	dmp1	5.15771	35.696591	col6a1	4.4643	22.074302	tgfbi	4.0867	16.990968	col6a3	4.25163	19.048795	labrum	1.85503	3.617587	ccnb2	5.60607	48.707536	tnfr1-induced	2.00899	4.024997	atp6v0a1	3.17749	9.047310	kpna2	5.25732	38.248222	ckap4	5.10658	34.453556
	kif20a	6.78819	110.521891	postn	6.13846	70.446579	lmf2	6.81367	112.491677	sparc	6.50803	91.014952	ccnb1	5.38291	41.727078	sec23a	4.97535	31.457852	hoxa11	4.36208	20.564462	p3h2	4.01813	16.202354	ltbp1	4.07363	16.837761	glenohumeral	1.86175	3.634492	ccna2	5.5887	48.124568				slc19a2	2.9294	7.617952	rbl1	5.22147	37.309494	dnaja2	5.03959	32.890306
	tpx2	6.5448	93.364567	col9a2	5.98653	63.405137	net1	6.78897	110.581517	tnmd	6.46516	88.350398	mcm5	5.37894	41.612352	mmp13	4.72002	26.355254	fgf2	4.31246	19.869142	col6a3	3.91396	15.073664	tnmd	3.37917	10.404751	labral	1.9023	3.738085	kif20a	5.51015	45.574298				kcnma1	2.67277	6.376529	mcm2	5.20473	36.879047	atp2a2	4.82347	28.314581
	ndc1	6.5304	92.437183	slc26a2	5.95932	62.220393	mis18a	6.73124	106.244334	col2a1	6.3886	83.783563	plk1	5.37498	41.498318	plod1	4.55861	23.565673	hhat	4.26801	19.266275	tgm2	3.79513	13.881865	ssr2	3.2753	9.681996	arthroscopic	1.91236	3.764253	cdkn3	5.10901	34.511535				casr	2.66781	6.354622	ifitm6	5.19419	36.610550	serpinh1	4.39196	20.994760
	cenpe	6.53005	92.414481	col1a1	5.91746	60.441311	tpx2	6.68506	102.897242	fkbp10	6.38751	83.720628	mcm2	5.28747	39.055963	sox5	4.54325	23.316041	bmp1	4.17564	18.071417	eln	3.7443	13.401267	ptdss1	3.24191	9.460484	glenoid	1.9163	3.774535	incenp	5.07743	33.764277				atp2a2	2.54473	5.835002	aurkb	5.13218	35.070365	derl1	4.19546	18.321390
	ccnb2	6.43451	86.493044	tnmd	5.83721	57.171100	mxd3	6.60815	97.555086	hapln1	6.12781	69.928692	pola2	5.19298	36.579993	hhat	4.07365	16.838019	col27a1	3.99608	15.956604	mmp14	3.56092	11.801641	strap	3.17861	9.054360	biceps	1.93603	3.826510	dpysl3	4.97417	31.432192				casq1	2.37787	5.197674	nuf2	5.07285	33.657412	tgm2	4.02069	16.231096
	ect2	6.13685	70.368096	acvr1	5.79869	55.664664	ccnb2	6.57144	95.104685	col27a1	6.0535	66.417870	chek1	5.1755	36.139489	ucma	4.02425	16.271203	thbs3	3.95497	15.508352	setd2	3.54673	11.686163	col1a1	3.09199	8.526695	shoulders	2.02199	4.061435	anln	4.7912	27.688133				atp1b1	1.5915	3.013631	cenpf	5.04549	33.025147	cfl1	3.96657	15.633498
	knstrn	6.03433	65.541290	fmod	5.78427	55.111065	dlgap5	6.56511	94.687784	eln	5.98312	63.255357	cdt1	5.13971	35.253782	col1a2	3.61411	12.244925	mmp14	3.86026	14.522905	itga5	2.92925	7.617142	srd5a3	2.97216	7.847129	humeral	2.08508	4.242996	mdc1	4.76819	27.250123				proton-coupled	2.37851	5.200011	pbk	5.01918	32.428237	actr3	3.79335	13.864762
	kif11	5.96554	62.489608	naglu	5.7822	55.032088	rad51	6.53679	92.847502	col9a2	5.96442	62.441068	mki67	4.92124	30.299810	bgn	3.56306	11.819182	col6a2	3.34446	10.157437	col11a1	2.85239	7.221981	fmod	2.9298	7.620042	shoulder_joint	2.09626	4.275989	ccne2	4.75493	27.000727				proton-dependent	2.38786	5.233792	mcm4	4.94613	30.827161	kdelr1	3.77075	13.649247
	stil	5.91519	60.346060	cxcl14	5.71411	52.494954	prc1	6.48861	89.797774	ltbp1	5.93196	61.051746	rrm2	4.85398	28.919766	srd5a3	3.45633	10.976408	fkbp10	3.33979	10.124591	postn	2.81755	7.049651	col1a2	2.80702	6.998399	humeral_head	2.14789	4.431800	ccne1	4.7344	26.619358				sodium-independent	2.39193	5.248587	ccne1	4.82192	28.284104	vapa	3.75931	13.541447
	ska3	5.90516	59.928163	col11a1	5.57426	47.645314	cenpt	6.34664	81.381967	mmp14	5.68651	51.500425	mcm4	4.79068	27.678330	col1a1	3.45145	10.939347	efemp2	3.16243	8.953391	itga6	2.6445	6.252803	col3a1	2.7837	6.886165	subluxation	2.179	4.528411	stmn1	4.59172	24.112674				exchangers	2.41818	5.344962	chek1	4.79628	27.785924	sfn	3.65847	12.627246
	cenpa	5.83589	57.118815	clec3a	5.56571	47.363803	kif11	6.24613	75.905609	mmp13	5.61757	49.097320	prc1	4.72422	26.432196	acp5	3.36728	10.319356	col6a3	2.91133	7.523137	mmp13	2.5536	5.870959	slc39a13	2.76763	6.809865	bicipital	2.25764	4.782070	racgap1	4.55973	23.583903							cdca8	4.55865	23.566270	ssr2	3.54943	11.708021
	cdc6	5.81318	56.226623	fgf2	5.45561	43.883557	kif20a	6.21058	74.057843	tgfbi	5.58385	47.963045	hells	4.71547	26.272228	arsb	3.16074	8.942892	pecam1	2.91001	7.516258	tet1	2.49553	5.639340	matn3	2.36508	5.151811	acromioclavicular	2.32577	5.013348	ube2c	4.4545	21.924855							mcm3	4.52818	23.073759	txndc12	3.51146	11.403917
	kif2c	5.76222	54.275220	dmp1	5.38719	41.850936	ska3	6.21007	74.031689	mmp3	5.54451	46.672763	klk10	4.71053	26.182475	adamts1	2.78677	6.900851	lama4	2.89353	7.430885	got1	2.48972	5.616701	glb1	2.32043	4.994809	tendinitis	2.4302	5.389670	mcm3	4.43893	21.689611							kif23	4.50314	22.676686	kdelr2	3.46994	11.080408
	cep55	5.72187	52.778162	fgfr3	5.37609	41.530117	plk1	6.1303	70.049354	chst14	5.4132	42.612453	cdc20	4.65315	25.161586	arl6	2.76362	6.790962	serpinh1	2.88929	7.409045	bmp1	2.37447	5.185444	col11a1	2.21741	4.650593	bucket-handle	2.53856	5.810075	mcm2	4.22249	18.667951							tpx2	4.48326	22.366397	tmed3	3.42729	10.757678
	ercc6l	5.70229	52.066709	tnc	5.31601	39.836219	ube2c	6.11399	69.262102	matn3	5.34737	40.711588	pole2	4.64083	24.947655	slc39a13	2.59701	6.050303	sparc	2.83354	7.128213	aspa	2.3235	5.005455	fdps	2.15864	4.464932	suprascapular	2.54099	5.819869	mtbp	4.10046	17.153901							cdkn2c	4.47539	22.244761	immt	3.42223	10.719963
	chek1	5.54417	46.661752	hgsnat	5.30526	39.540505	melk	5.90259	59.821308	emilin1	5.1831	36.330286	cd109	4.55817	23.558344	npr3	2.54108	5.820247	dysf	2.78459	6.890407	tufm	2.10004	4.287221	plec	2.14986	4.437835	elbow_joint	2.6712	6.369597	rad51	3.99527	15.947594							cdca3	4.45368	21.912514	smpd4	3.41336	10.654239
	cenpf	5.45451	43.850301	tsku	5.28594	39.014569	cdk1	5.85568	57.907473	thbs3	5.1637	35.845029	cks2	4.45348	21.909379	ptpn22	2.48165	5.585355	zdhhc2	2.70994	6.542963	pycr1	1.87978	3.680181	mmp3	2.03271	4.091737	shaver	2.79746	6.952148	myc	3.93775	15.324313							cenpu	4.43824	21.679213	tuba1c	3.36885	10.330607
	cdca3	5.43681	43.315593	zdhhc2	5.25816	38.270345	cenpf	5.8424	57.376930	loxl4	5.08642	33.975364	bub1	4.44531	21.785729	bmp1	2.23963	4.722770	cilp	2.52689	5.763281	me1	1.86707	3.647898	mme	1.88554	3.694921	tarsal	2.9483	7.718399	birc5	3.75425	13.494045							e2f3	4.43116	21.573013	mogs	3.2281	9.370324
	aurka	5.40602	42.400815	col27a1	5.20482	36.881333	kif2c	5.78086	54.980882	col25a1	5.04894	33.104172	dtl	4.34515	20.324477	strap	2.03382	4.094874	adamts1	2.51597	5.719827	efhd2	1.74089	3.342404	laxity	2.37985	5.204829	baseplate	2.98741	7.930484	kif11	3.67074	12.735074							cenpe	4.4186	21.386103	cd109	3.04951	8.279334
	racgap1	5.37505	41.500162	trappc1	4.91287	30.124499	pbk	5.77966	54.935325	fbl	4.99738	31.941881	asf1b	4.33598	20.195721	serpinh1	1.95106	3.866588	nt5e	2.47668	5.566168	procollagen-lysine	1.86072	3.631892	cutis	2.47318	5.552663	carpal_joints	2.98971	7.943170	mis18bp1	3.60286	12.149760							mcm5	4.35537	20.469083	adpgk	2.92397	7.589321
	dtl	5.30502	39.533878	nt5e	4.85795	28.999324	ccnb1	5.74034	53.458310	lama4	4.94869	30.881960	kpna2	4.30795	19.807171	sdc3	1.86137	3.633524	cd44	2.4027	5.287923	5-dioxygenase	1.86655	3.646596	occulta	2.60705	6.092577				e2f3	3.28275	9.732090							rrm2	4.34421	20.311241	dlg1	2.76222	6.784392
	ccna2	5.30314	39.482559	adamts1	4.82828	28.409112	cdca8	5.69603	51.841239	nrep	4.94118	30.721516	ska3	4.2756	19.368018	mmp3	1.85301	3.612536	p3h2	2.3741	5.184114	2-oxoglutarate	1.96156	3.894827	laxa	2.64213	6.242534				aurkb	3.14126	8.822917							ect2	4.34301	20.294403	rtn4	2.76066	6.777044
	stk10	5.17904	36.228199	gsto1	4.74387	26.794613	mis12	5.5832	47.941329	p3h2	4.8736	29.315761	pola1	4.23692	18.855578	lbr	1.8276	3.549455	suv39h2	2.30426	4.939136	procollagen-proline	2.32082	4.996151	supravalvular	2.6868	6.438850				rps6ka1	3.04859	8.274038							kif2c	4.28828	19.538947	surf4	2.74747	6.715399
	cks2	5.15223	35.561190	col1a2	4.655	25.193900	spc25	5.46708	44.234015	saa2	4.80495	27.953267	kif20a	4.21947	18.628950	kif22	1.70129	3.251912	adam12	2.29417	4.904701				dolichocephaly	2.6946	6.473758				cenpt	3.02136	8.119312							cdca2	4.23556	18.837763	c1qtnf1	2.73009	6.634975
	top2a	5.12856	34.982507	cd44	4.48743	22.431054	mcm2	5.43878	43.374509	cilp	4.77145	27.311692	aurkb	4.1533	17.793729	epiphyseal	1.99091	3.974863	hey1	2.29337	4.901993				hypermetropia	2.78577	6.896070				chek1	2.83603	7.140523							kif20a	4.21147	18.525820	esyt1	2.7044	6.517887
	smc2	5.11104	34.560227	nog	4.29826	19.674523	cenpu	5.43725	43.328695	efemp2	4.75976	27.091273	uhrf1	4.14286	17.665417	epiphyses	2.06584	4.186777	sox5	2.12513	4.362438				microstomia	2.82071	7.065115				mapk1	2.80078	6.968155							nusap1	4.19187	18.275883	strap	2.65169	6.284025
	zwilch	5.08286	33.891713	trpv4	4.2447	18.957491	cdkn3	5.4278	43.045778	cspg4	4.6964	25.927260	top2a	4.10755	17.238342	epiphyses	2.08445	4.241141	enpp2	1.83853	3.576443				ligamentous	2.88505	7.387301				nusap1	2.72531	6.613002							mki67	4.1877	18.223171	idh1	2.634	6.207459
	anln	5.06974	33.584766	col6a1	4.11326	17.306673	nuf2	5.39742	42.148744	wac	4.686	25.741100	cenpf	4.09347	17.070917	spondyloepiphyseal	2.14669	4.428111	dsg2	1.76859	3.407204				space-occupying	2.88597	7.392043				ska3	2.65094	6.280763							rad1	4.14946	17.746427	cdc20	2.55201	5.864498
	kif18b	5.01754	32.391411	creld2	3.97794	15.757173	nusap1	5.36271	41.146960	pi16	4.67024	25.461447	efna3	4.03594	16.403599	chondrodysplasia	2.15194	4.444261	gsto1	1.71097	3.273808				angulation	2.94903	7.722286				ndc80	2.61433	6.123408							rps6ka1	4.12024	17.390692	actn1	1.94325	3.845700
	kif15	4.99761	31.947095	mmp14	3.95869	15.548327	cenpl	5.3141	39.783642	nid2	4.61303	24.471527	pttg1	4.01909	16.213162	metaphyseal	2.27537	4.841206	pi16	1.65731	3.154268										pelp1	2.60864	6.099277							aspm	4.08574	16.979722	tnfrsf10b	1.89783	3.726522
	cdk2	4.97798	31.515350	gpr22	3.87224	14.643997	wdr82	5.27751	38.787261	myh11	4.54504	23.344928	rad51	3.98381	15.821503	chondrodysplasias	2.36388	5.147541	tendons	1.64066	3.118093										mcm5	2.57738	5.968567							lbr	4.03304	16.370686	fkbp10	1.86113	3.632921
	cdca8	4.96314	31.192814	col3a1	3.86153	14.535721	rrm2	5.2418	37.839035	igfbp7	4.46842	22.137438	cdkn3	3.97662	15.742832	kyphosis	2.37359	5.182280	tendons	1.66154	3.163547										ccng1	2.51717	5.724583							ncapg	4.00717	16.079748	vcp	1.78288	3.441121
	cdt1	4.91039	30.072779	sparc	3.82161	14.139038	rbbp8	5.22941	37.515297	angptl2	4.43489	21.628872	nrip1	3.94422	15.393141	valgum	2.38149	5.210745	ligaments	1.76008	3.387167										nek2	2.47143	5.545922							ccng1	3.94642	15.416729	dpp9	1.7695	3.409356
	nusap1	4.88838	29.617490	clec3b	3.80824	14.008584	cenpe	5.09777	34.243854	csrp2	4.41517	21.335314	birc5	3.82534	14.175591	achondrogenesis	2.41957	5.350121	ligaments	1.77205	3.415394										cdca2	2.46429	5.518535							kif11	3.85512	14.471287	lbr	1.68753	3.221049
	mcm3	4.74484	26.812681	cask	3.79979	13.926782	kif23	5.06953	33.580106	adamts1	4.40692	21.213618	kif23	3.74947	13.449377	epiphysis	2.4564	5.488448	tendon	1.91032	3.758923										bub1	2.44166	5.432664							aurka	3.85055	14.425547	bok	1.60166	3.034913
	mis12	4.72225	26.396118	sla	3.76949	13.637373	mcm4	4.76975	27.279650	fgf2	4.37514	20.751478	cdca2	3.74749	13.430948	osteochondrodysplasia	2.55741	5.886514	achilles_tendon	1.99446	3.984670										orc3	2.40408	5.292983							csk	3.83277	14.248795
	ckap2	4.67681	25.577676	sumf1	3.76813	13.624471	ccna2	4.72229	26.396823	tgm2	4.36615	20.622516	rbbp8	3.63958	12.463031	punctata	2.56032	5.898397	achilles	2.06915	4.196382										e2f8	2.17613	4.519393							skp2	3.83205	14.241722
	mcm4	4.66165	25.310315	tnfaip6	3.6995	12.991551	mcm3	4.65883	25.260867	matn2	4.34491	20.321184	cdca8	3.58447	11.995868	fairbank	2.64576	6.258266	tenocytes	2.07551	4.214928										cenpa	2.17563	4.517840							ube2c	3.80233	13.951304
	mcm2	4.65159	25.134354	bmp1	3.61648	12.265013	kif15	4.52922	23.090346	itga5	4.29725	19.660731	racgap1	3.54605	11.680701	acetabulum	2.65181	6.284537	tenocytes	2.0796	4.226911										cdca3	2.14516	4.423417							melk	3.78934	13.826291
	mid2	4.61652	24.530729	col5a1	3.5937	12.072888	aurka	4.45837	21.983855	sec23a	4.2926	19.597529	pelp1	3.47399	11.111548	acetabulum	2.65226	6.286503	ossificans	2.09976	4.286375										med7	1.86295	3.637496							mapk1	3.76177	13.564517
	mcm5	4.57148	23.776768	col18a1	3.56366	11.824146	nup133	4.44129	21.725032	aldh18a1	4.28062	19.435447	kif2c	3.46624	11.052007	hypochondrogenesis	2.68926	6.449816	fibrodysplasia	2.12014	4.347356										pbk	1.66295	3.166624							cenpa	3.70228	13.016617
	ncapd2	4.48045	22.322907	adam12	3.41785	10.687474	rad1	4.39736	21.073466	sec24d	4.27584	19.371145	dnaja2	3.46063	11.009171	kyphotic	2.76295	6.787824	progressiva	2.12599	4.365024										tpx2	1.64421	3.125760							cdt1	3.69832	12.980888
	birc5	4.45777	21.974728	hmmr	3.38959	10.480152	fen1	4.35413	20.451396	pxdn	4.12481	17.445832	ect2	3.43403	10.807981	larsen	2.80009	6.964827	fascia	2.25798	4.783227										mybl2	1.59468	3.020277							myc	3.68816	12.889778
	cdkn3	4.24548	18.967796	lox	3.36223	10.283260	mcm5	4.2014	18.397002	adam12	4.05068	16.571993	aatf	3.43061	10.782461	stippled	2.87806	7.351629	fascia	2.25901	4.786623										cdk	2.14252	4.415326							racgap1	3.51741	11.451086
	fam83d	4.15285	17.788157	sec23a	3.34458	10.158265	ttf2	4.18784	18.224909	pecam1	4.00559	16.062116	nusap1	3.4137	10.656790																a2-cdk2	2.27092	4.826297							pole2	3.49904	11.306199
	cep76	4.12558	17.455192	smo	3.34396	10.153865	racgap1	4.15418	17.804604	vit	3.91203	15.053523	ing2	3.38968	10.480833																b1-cdk1	2.4077	5.306293							hmmr	3.49786	11.296970
	melk	3.92603	15.200350	plpp2	3.2692	9.641148	kif22	4.10941	17.260628	sdc1	3.89078	14.833468	ube2c	3.30521	9.884766																d1-cdk4	2.4427	5.436591							espl1	3.45931	10.999070
	hmmr	3.91893	15.125654	uggt1	3.2135	9.275979	chek1	4.10683	17.229721	col20a1	3.88801	14.804979	pbk	3.28761	9.764934																cdk-mediated	2.44823	5.457457							mastl	3.45037	10.931112
	nuf2	3.90974	15.029687	adgrg6	3.20357	9.212370	mastl	4.09787	17.123032	dmp1	3.85467	14.466745	tcf19	3.25007	9.514087																purvalanol	2.46821	5.533557							dlgap5	3.37334	10.362760
	dlgap5	3.86428	14.563407	slc10a7	3.19464	9.155495	appbp2	4.08035	16.916354	tnfrsf1a	3.78329	13.768381	csk	3.2496	9.511049																									troap	3.2927	9.799442
	mdc1	3.83929	14.313399	itga5	3.17752	9.047482	uhrf1	3.99079	15.898201	nog	3.76769	13.620314	depdc1b	3.15844	8.928634																									hells	3.23772	9.433025
	rbbp8	3.76691	13.612925	col6a3	3.15532	8.909343	dtl	3.98753	15.862323	itgb6	3.72994	13.268516	maz	3.14797	8.864056																									ndc80	3.22993	9.382229
	e2f8	3.72348	13.209280	thbs3	3.15271	8.893238	cdc6	3.86308	14.551378	pdgfc	3.65367	12.585311	hdac2	3.12307	8.712424																									smc2	3.21852	9.308291
	mpp2	3.70138	13.008432	matn2	3.12957	8.751760	timeless	3.85713	14.491413	myh10	3.54992	11.712037	ckap2l	3.09894	8.567882																									ercc6	3.05417	8.306071
	ccne1	3.65697	12.614178	nfatc2	3.1266	8.733715	dhx9	3.78813	13.814698	spon2	3.52493	11.510940	nek2	3.00689	8.038272																									cep55	3.03514	8.197258
	cdkn1a	3.56101	11.802430	ror2	3.07099	8.403471	birc5	3.78544	13.788988	cd44	3.3189	9.979052	sfn	2.97866	7.882551																									h2-ab1	3.00172	8.009547
	elp4	3.49458	11.271314	hoxa11	3.0326	8.182827	lig1	3.71474	13.129478	edil3	3.31488	9.951275	tpx2	2.79433	6.937095																									safb	3.00154	8.008558
	rps6ka1	3.47278	11.102265	pecam1	3.00664	8.036904	mdc1	3.69138	12.918614	itga6	3.28992	9.780572	ikbip	2.77844	6.861121																									cdr2	2.96548	7.810837
	riok2	3.43651	10.826638	crispld1	3.00653	8.036267	spc24	3.68866	12.894303	ccna2	3.24736	9.496266	kif18b	2.77844	6.861121																									cenpi	2.96201	7.792110
	ncapg	3.36105	10.274890	itm2a	2.98485	7.916415	pola1	3.61959	12.291484	reck	3.20109	9.196503	foxo4	2.76249	6.785684																									clec7a	2.8502	7.210987
	kif4	3.31298	9.938147	nid2	2.97404	7.857341	mki67	3.57582	11.924217	clec3a	3.15666	8.917608	gas2l3	2.724	6.607005																									rad51	2.75237	6.738248
	kif22	3.28989	9.780399	col15a1	2.94526	7.702164	ect2	3.55725	11.771672	sulf1	3.05624	8.318011	cenpe	2.66621	6.347577																									sfn	2.71614	6.571124
	mybl2	3.25245	9.529854	tapt1	2.93546	7.650027	cdt1	3.42748	10.759030	npnt	3.00722	8.040130	ppp1cc	2.66609	6.347072																									orc3	2.7126	6.555032
	oip5	3.22815	9.370683	lpl	2.93528	7.649059	mybl2	3.37863	10.400869	mamdc2	2.99445	7.969265	mtbp	2.63026	6.191389																									perp	2.68604	6.435455
	spc25	3.06814	8.386887	sec24d	2.92059	7.571531	mtbp	3.35607	10.239451	ripk3	2.98192	7.900380	lig1	2.62317	6.161004																									trem1	2.62897	6.185833
	ccne2	2.90723	7.501751	eln	2.84322	7.176189	nek2	3.1849	9.093924	itga9	2.94924	7.723419	chaf1a	2.59206	6.029595																									ckap2	2.52118	5.740502
	mis18bp1	2.77451	6.842435	adamts14	2.81701	7.046999	polr1e	3.0453	8.255172	tnfaip6	2.94433	7.697155	trim28	2.58809	6.013012																									atad2	2.4745	5.557746
	cdr2	2.7229	6.601966	plpp1	2.79589	6.944579	trim28	3.04255	8.239483	hmmr	2.87526	7.337353	orc3	2.51884	5.731218																									nek4	2.46262	5.512186
	usp28	2.68137	6.414631	slc20a2	2.76391	6.792324	cdkn1a	2.96432	7.804565	cltc	2.81244	7.024706	g2e3	2.5016	5.663147																									cenpm	2.46262	5.512186
	mki67	2.66472	6.341064	efemp2	2.71549	6.568175	hmmr	2.89107	7.418187	sdc3	2.773	6.835300	sh3kbp1	2.45587	5.486449																									myo9b	2.44632	5.450252
	rad51	2.63952	6.231238	edil3	2.71508	6.566285	cd109	2.8294	7.107762	wdhd1	2.64293	6.246002	rbm15b	2.40742	5.305253																									ly6c1	2.41228	5.323154
	chaf1a	2.59551	6.044030	tgm2	2.68861	6.446940	sass6	2.80747	7.000555	dag1	2.62997	6.190148	cyb5b	2.37036	5.170700																									fen1	2.39049	5.243340
	ncapg2	2.45489	5.482721	tgfbi	2.68078	6.412035	cep55	2.61489	6.125785	polr1e	2.62653	6.175393	prim2	2.36197	5.140729																									kif4	2.3829	5.215832
	stmn1	2.39215	5.249390	acp5	2.66475	6.341169	mre11a	2.54193	5.823658	cxcl14	2.55075	5.859375	nfkb1	2.34533	5.081763																									anln	2.29678	4.913604
	wdhd1	2.18524	4.548036	plod2	2.6556	6.301091	slc15a4	2.5321	5.784147	ror2	2.51825	5.728877	mxd3	2.33666	5.051302																									itm2a	2.2782	4.850724
	cdca2	2.05379	4.151963	igfbp2	2.6404	6.235035	cdk2	2.49828	5.650099	jag1	2.51203	5.704221	cenpi	2.26943	4.821328																									ppp1cc	2.22857	4.686690
	ppp1cc	2.04681	4.131905	ltbp1	2.60423	6.080648	rangap1	2.4492	5.461141	cd36	2.49373	5.632309	ptgr1	2.25256	4.765282																									swap70	2.22162	4.664158
	rrm2	1.98939	3.970690	nfatc1	2.58671	6.007265	myc	2.41847	5.346049	flrt2	2.48418	5.595180	kif11	2.235	4.707611																									e2f8	2.1491	4.435509
	cenpn	1.96551	3.905500	nusap1	2.57274	5.949400	fignl1	2.36664	5.157370	clec3b	2.48283	5.589931	nop16	2.1751	4.516181																									uhrf1	1.9917	3.977059
	pask	1.88231	3.686657	lama4	2.49619	5.641949	prx	2.30435	4.939453	trpv4	2.43557	5.409769	stmn1	2.1245	4.360529																									pde3a	1.98659	3.962998
	txnl4a	1.86914	3.653153	col6a2	2.47353	5.554013	nek4	2.24408	4.737343	igfbp2	2.37702	5.194615	drg1	2.07724	4.220001																									mpp2	1.88314	3.688763
	cenpt	1.85155	3.608879	h2-ab1	2.44913	5.460860	cyp51	2.04853	4.136855	myof	2.37246	5.178232	fancb	2.06296	4.178425																									sulf1	1.81392	3.515952
	spc24	1.7573	3.380650	jag1	2.44745	5.454498	rexo4	1.99467	3.985241	itih5	2.34996	5.098096	fgfr3	2.03724	4.104589																									mapk6	1.80952	3.505265
	e2f3	1.71596	3.285142	prkca	2.43293	5.399890	ccne2	1.96894	3.914804	sox5	2.33649	5.050708	mapk1	2.02946	4.082512																									tlr5	1.80843	3.502604
	aspm	1.67214	3.186868	igf2	2.31286	4.968678	chaf1a	1.92342	3.793219	ripk1	2.2808	4.859488	ncapd2	2.02786	4.077982																									notch4	1.79842	3.478392
	rbl1	1.64103	3.118879	plaa	2.26685	4.812716	nup35	1.91494	3.770980	tnfrsf10b	2.27375	4.835770	aurka	1.97107	3.920600																									spc25	1.71748	3.288626
	myc	1.6278	3.090407	vit	2.2366	4.712848	stmn1	1.88014	3.681114	scarb1	2.26989	4.822848	mybl1	1.96901	3.914998																									tnfrsf10b	1.70609	3.262755
	anaphase-promoting	1.96784	3.911812	fgfrl1	2.22761	4.683581	pask	1.84553	3.593846	nt5e	2.21067	4.628901	gspt1	1.95351	3.873152																									ifi30	1.6961	3.240228
	securin	2.09901	4.284164	ccna2	2.22467	4.674055	anln	1.78222	3.439560	coro1c	2.20054	4.596521	dlgap5	1.93016	3.810985																									incenp	1.62072	3.075286
	polo	2.17568	4.517998	rhog	2.18206	4.538017	hdac2	1.74989	3.363330	tfg	2.17241	4.507771	aspm	1.88519	3.694006																									prkca	1.59597	3.022975
	polo-like	2.2561	4.776993	setd2	2.06695	4.190003	asf1b	1.72623	3.308620	iqgap1	2.00019	4.000529	ppp1r8	1.87897	3.678127
	spindle_pole_bodies	2.30275	4.933971	dag1	2.05639	4.159447	cdca3	1.69788	3.244250	slc39a13	1.98691	3.963859	aif1l	1.87897	3.678127
	apc-cdc20	2.37006	5.169627	gfm1	2.0255	4.071336	rbl1	1.6299	3.094907	actn1	1.95078	3.865823	fntb	1.86417	3.640595
				nudt7	1.97508	3.931505				dchs1	1.94918	3.861558	cenpa	1.84725	3.598129
				serpinh1	1.96937	3.915976				fscn1	1.89527	3.719906	rb1cc1	1.82486	3.542729
				adam17	1.96087	3.892976				pycr1	1.85384	3.614603	lmnb2	1.8214	3.534251
				emilin1	1.90967	3.757233				tia1	1.849	3.602500	fen1	1.81428	3.516844
				npr3	1.87428	3.666184				cfl1	1.81883	3.527954	mmp14	1.74209	3.345199
				p3h2	1.86052	3.631382				kdelr2	1.81557	3.519983	med1	1.73967	3.339578
				flrt2	1.85911	3.627843				gar1	1.81077	3.508287	trip13	1.724	3.303503
				hhat	1.81706	3.523619				s100a10	1.80513	3.494610	tspan5	1.724	3.303503
				slc39a13	1.81068	3.508081				slc26a2	1.74385	3.349287	eif3b	1.7041	3.258249
				hey1	1.81053	3.507707				nfatc1	1.73516	3.329174	plagl1	1.69872	3.246134
				strap	1.79002	3.458193				ace	1.72287	3.300919	ttyh1	1.69752	3.243439
				gipc1	1.7731	3.417877				smo	1.70723	3.265344	mpp2	1.68938	3.225172
				pcsk5	1.76226	3.392302				adam17	1.68059	3.205598	ltbp1	1.66435	3.169714
				pcolce	1.75544	3.376287				igf2	1.60663	3.045404	wdr1	1.63554	3.107034
				casr	1.71093	3.273728				notch4	1.58951	3.009476	wdr77	1.62501	3.084437
				nfkb1	1.6251	3.084633				collagen	1.89543	3.720335	cep55	1.59197	3.014605
				angptl2	1.62385	3.081973				fibrils	2.04166	4.117191	p130	1.67826	3.200408
				ssc5d	1.60747	3.047160				fibrillar	2.05266	4.148691	p107	1.6933	3.233950
				cartilage	1.89991	3.731909				procollagen	2.10334	4.297035	e2f	1.90411	3.742791
				cartilage	1.90629	3.748442				ecm	2.12933	4.375148	rb-e2f	2.09202	4.263457
				chondrocytes	1.96935	3.915903				fibril	2.14724	4.429806		#NUM!
				chondrocytes	1.98358	3.954735				tenascin	2.33424	5.042864		#NUM!
				proteoglycans	2.02489	4.069609				myofibroblasts	2.34403	5.077190		#NUM!
				chondrocyte	2.04251	4.119627				myofibroblasts	2.34707	5.087900		#NUM!
				cartilage_articular	2.07152	4.203282				facit	2.39733	5.268282		#NUM!
				articular	2.09239	4.264530				xviii	2.44253	5.435933		#NUM!
				proteoglycan	2.11136	4.320987				network-forming	2.45335	5.476874		#NUM!
				ossification	2.14302	4.416862				c-endopeptidase	2.53872	5.810713		#NUM!
				chondrogenesis	2.18036	4.532668				trimerization	2.67476	6.385315		#NUM!
				glycosaminoglycan	2.1911	4.566545					#NUM!
				hyaline_cartilage	2.30353	4.936651					#NUM!
				osteochondral	2.3505	5.100012					#NUM!
				heparan	2.3609	5.136918					#NUM!
				fibrocartilage	2.38208	5.212892					#NUM!
				fibrocartilage	2.38348	5.217933					#NUM!
				sulfation	2.39843	5.272279					#NUM!
				periosteum	2.45024	5.465079					#NUM!
				periosteum	2.45037	5.465552					#NUM!
				osteophyte	2.46688	5.528477					#NUM!
				intramembranous	2.49581	5.640437					#NUM!
				syndecan	2.51506	5.716200					#NUM!
				menisci	2.60021	6.063751					#NUM!
				4-sulfate	2.6224	6.157750					#NUM!
				2-o-sulfotransferase	2.65335	6.291279					#NUM!
				6-o-sulfotransferase	2.68878	6.447681					#NUM!
				paps	2.74694	6.712919					#NUM!
				n-deacetylase	2.75765	6.762948					#NUM!
				n-sulfotransferase	2.75895	6.769044					#NUM!
				intramedullary	2.78863	6.909746					#NUM!

## Sheet: Suppl. Table 1.3
Supplementary Table 1.3 Compbio outputs based on the downregulated DEGs from microarray on NP tissues; 17wk vs 4wk
Theme	IL1 and megakaryocytes in obesity			VEGF-A complex			Hypokalemic alkalosis			Complement component C3dg receptor activity		Hsp27 protein binding		Negative regulation of TORC2 signaling			Short tibia		Neurofibrillary tangles
Thematic Enrichment Score	87711			76155.9			64877.9			63173.3		47545.3		28956.6			28229.5		27021.2
Coordinates in 3-D Space	X: 11.89,Y: 33.78,Z:-27.28			X: -9.90,Y: -3.98,Z: 39.86			X:-26.28,Y: 30.08,Z: -0.96			X: 1.87,Y:-13.82,Z: 42.07		X: 37.80,Y:-12.15,Z: 6.27		X:-43.66,Y: -3.86,Z:-15.54			X:-32.08,Y: 22.61,Z:-11.39		X: 5.54,Y: -6.16,Z: 41.51
Entity Total	19			40			28			15		29		11			30		23
Concept Total	11			12			25			7		2		4			11		7
Pvalue	<0.001			<0.001			<0.001			<0.001		0.006		0.628			0.673		0.577
NEScore	1.546			1.694			1.477			1.472		1.257		0.967			0.959		0.979
Entity (gene)
Concept	Entity/Concept	Log2(Enrichment)	Enrichment	Entity/Concept	Log2(Enrichment)	Enrichment	Entity/Concept	Log2(Enrichment)	Enrichment	Entity/Concept	Enrichment	Entity/Concept	Enrichment	Entity/Concept	Log2(Enrichment)	Enrichment	Entity/Concept	Enrichment	Entity/Concept	Enrichment
	itga2b	11.0981	2192.176726	lyve1	10.5584	1507.993237	kcnj1	9.89012	948.903933	c4b	2169.232438	hspb1	4359.512648	crtc2	11.668	3254.048411	pax1	424.655251	phf1	838.307845
	gp9	10.6101	1562.970217	cr2	9.3676	660.585589	cldn16	9.64012	797.929805	cr2	1763.810612	hspb8	650.711529	mup1	6.0033	64.146589	lbh	267.676271	app	553.078789
	thpo	9.54143	745.172068	vegfa	8.72034	421.777473	nr3c2	8.52909	369.413097	masp1	815.329431	hspb2	475.903622	nedd4l	5.35966	41.059950	bhlha9	170.936595	ftcd	229.589769
	gata1	8.94078	491.409401	vegfb	7.93873	245.354743	slc26a3	8.30884	317.109881	fhl1	211.075407	cryab	302.968790	fhl1	5.19359	36.595364	mrln	146.312537	apoe	173.358860
	il11ra1	7.34773	162.887224	cxcl13	7.73018	212.332290	slc7a13	5.98049	63.140518	kir3dl1	108.673655	selenbp1	64.362415	cts7	4.52175	22.971116	wnt7a	124.216396	clu	34.109336
	il11ra2	7.26704	154.026911	glycam1	7.24948	152.164107	aqp3	5.6058	48.698317	serping1	108.672987	odf1	47.196322	pkn1	4.18912	18.241067	tbx4	90.535200	lrfn5	20.839374
	myoz1	6.95536	124.100143	ccl19	6.77383	109.427348	nphs1	5.2881	39.072982	afm	23.011346	ppp1r14a	24.467716	nova1	3.64895	12.544221	fibin	37.707514	npy	13.544895
	prl7a1	6.5305	92.443280	ccr7	6.34982	81.561938	pfdn5	4.9318	30.522401	lgals3	16.733593	clu	21.538915	serpine2	3.37519	10.376116	zic4	36.510012	ppp1r14a	13.456368
	mafg	5.34034	40.513654	tnfsf15	6.15291	71.155908	fxyd4	4.88535	29.555371	cd209a	11.248547	sod1	17.573693	ndrg1	3.18177	9.074208	tas2r131	33.901931	chchd2	13.177900
	rbm8a	4.94394	30.780315	bcl6	5.82071	56.520696	foxi1	4.81315	28.112651	clu	9.512170	s100a11	17.533568	slc1a2	2.30475	4.940802	grem1	31.837744	slc1a2	9.660921
	kit	4.38366	20.874389	afm	5.59617	48.374391	lcn2	4.74609	26.835838	pros1	7.306523	cers1	16.439449	myt1	2.2248	4.674455	zic3	30.695487	hspb1	9.357328
	clrn1	3.34688	10.174468	gja3	4.92827	30.447824	s100g	4.39613	21.055553	gbp2	7.204624	rad23a	15.295405	torc2	2.2947	4.906517	syndig1l	20.524755	apod	8.953464
	prg4	2.73995	6.680490	nphs1	4.79995	27.856619	slc12a6	4.10857	17.250561	rb1	5.962323	gpx1	14.804750	torc1	2.34964	5.096969	sox6	20.041423	dab1	7.543405
	srgn	2.72654	6.618658	odam	4.44929	21.845901	slc26a7	3.74301	13.389305	apoe	3.525258	crygs	11.823769	bends	2.49791	5.648650	cts7	19.121258	klk6	6.054407
	ccl5	2.45915	5.498930	enpp2	3.73697	13.333418	slc6a19	3.63214	12.398921	tgoln2	3.143732	msmp	9.810127	locomotory	2.49988	5.656397	ube2v1	17.042615	ryr2	5.047590
	wasl	2.12148	4.351410	angptl7	3.73626	13.326846	slc5a12	3.38839	10.471443	ic3b	4.332995	myoz1	6.392566				cilp	15.978569	grin2b	4.319997
	creg1	1.81431	3.516910	gja4	3.73381	13.304227	slc6a18	3.29123	9.789442	c3b	4.361617	s100a4	5.978821				nepn	15.112487	map6	4.294522
	gabrr1	1.77683	3.426733	ccl5	3.55955	11.790442	slc17a3	3.00162	8.008983	opsonin	4.522781	pfdn5	5.903780				osr2	12.086536	asl	3.461176
	lepr	1.75009	3.363804	lgals3bp	3.50608	11.361499	insrr	2.90861	7.508927	c3dg	4.551411	pam16	5.561067				pirt	10.783864	txnip	3.446234
	megakaryocytes	1.89065	3.708012	gje1	3.41443	10.662175	nedd4l	2.67577	6.389789	c3d	4.789747	pmp22	5.317590				cd99	10.056118	c4b	3.431598
	megakaryocytes	1.91034	3.758968	lgals3	3.23545	9.418163	pde8b	2.66168	6.327716	ficolins	5.191085	prss1	4.799436				prg4	9.313789	sod1	3.348346
	megakaryocyte	1.98372	3.955106	ccl2	3.23154	9.392706	car5b	2.29635	4.912137	rbl	8.064069	apoe	4.163469				etv5	8.884213	stxbp1	3.096447
	megakaryocytic	2.13221	4.383881	six1	3.15202	8.889013	slc22a30	2.2783	4.851057			gcdh	4.131601				six1	8.411702	hspb2	3.001469
	iiia	2.2498	4.756162	sbsn	2.94704	7.711645	fxyd7	2.25844	4.784748			misp	3.984448				erc2	5.629472	neurofibrillary_tangles	3.627535
	thrombopoietin	2.25477	4.772582	myoz1	2.78412	6.888158	slc22a4	2.07945	4.226462			gstp1	3.867397				bmp6	4.488918	tangles	3.671785
	bernard-soulier	2.32209	5.000552	rbpms	2.7708	6.824866	ptprn	1.96914	3.915353			masp1	3.738219				hfe	3.547918	neurofibrillary	3.773754
	thrombasthenia	2.37249	5.178350	mrc1	2.72982	6.633735	sycp3	1.82861	3.551938			ftcd	3.320374				ssbp3	3.538751	neuropil_threads	5.635256
	glanzmann	2.38834	5.235532	tnfrsf25	2.66584	6.345971	slc26a5	1.62234	3.078742			hs3st1	3.253816				cytl1	3.531451	arteriolosclerosis	5.711058
	ib-ix-v	2.76495	6.797249	pkhd1l1	2.65377	6.293090	hypokalemia	2.05094	4.143772			fhl1	3.032795				s100g	3.288847	cerebral_arteries	6.262352
	interleukin-11	2.85286	7.224309	itga2b	2.63654	6.218378	hypercalciuria	2.06914	4.196360								msmp	3.078390	indiana	6.600607
				mmp19	2.51131	5.701373	polyuria	2.08086	4.230607								tibia	4.214884
				radil	2.46418	5.518129	alkalosis	2.15767	4.461945								tibia	4.229507
				epha1	2.4566	5.489227	henle	2.16346	4.479886								fibula	4.891955
				axl	2.39735	5.268345	loop_henle	2.16508	4.484924								fibula	4.923548
				hbegf	2.24138	4.728487	nephrocalcinosis	2.19044	4.564457								lumbar_vertebrae	5.567573
				cd99	2.05004	4.141181	hypokalemic	2.20343	4.605743								bud	5.632736
				creld1	2.03502	4.098295	hypomagnesemia	2.22481	4.674485								vertebra	6.245113
				coch	1.95802	3.885275	tubule	2.23704	4.714300								phocomelia	6.352825
				tm4sf5	1.75636	3.378446	polydipsia	2.25937	4.787814								sclerotome	6.454896
				aqp3	1.74309	3.347523	hyponatremia	2.29914	4.921656								retropharyngeal	7.058016
				lymphatic_vessels	2.14598	4.425941	polyhydramnios	2.32211	5.000645								angulation	7.588113
				endothelium_lymphatic	2.15244	4.445779	hyperaldosteronism	2.37167	5.175405
				venules	2.19064	4.565080	gitelman	2.38584	5.226470
				venules	2.20239	4.602405	hypocalcemia	2.40449	5.294476
				lymphangiogenesis	2.32827	5.022018	hypochloremia	2.46568	5.523856
				vegf-a	2.38286	5.215711	acid-base	2.50559	5.678812
				integrin-mediated	2.51369	5.710796	mineralocorticoid	2.52564	5.758289
				avascular	2.57526	5.959773	nephrons	2.53908	5.812176
				dendritic_follicular	2.58497	6.000042	kidney_tubules_distal	2.76536	6.799165
				interdigitating	2.58779	6.011760	kidney_tubules_collecting	2.78235	6.879740
				receptor-3	2.63903	6.229148	cystinuria	2.80841	7.005125
				bridging	2.66797	6.355322	calculi	2.87416	7.331766
							lithiasis	2.93084	7.625544

## Sheet: Suppl. Table 1.4
Supplementary Table 1.4 Compbio outputs based on the downregulated DEGs from microarray on AF tissues; 17wk vs 4wk
Theme	CAF-1 complex		RUNX2 regulates osteoblast differentiation			Mandibular condyle articular cartilage development		SLIT/ROBO Signaling		Fibrillin 1, 2, degradation by MMP2, 9, 12 and 13		Arp2/3 complex binding			PTP receptors		Galactosylation of collagen propeptide hydroxylysines by procollagen galactosyltransferases 1, 2		Sos-mediated nucleotide exchange of Ras			Hypophosphatemic rickets		Cementum mineralization		Ubiquitination of Securin by phospho-APC/C:Cdc20 complex		N-acetylgalactosamine 4-sulfate 6-O-sulfotransferase activity		TRAPPII protein complex		Procollagen-lysine 5-dioxygenase activity
Thematic Enrichment Score	449756		351469			324264		266347		235207		234929			233454		229761		221934			149372		132229		127463		106793		90328.9		83224.4
Coordinates in 3-D Space	X: 5.84,Y: 17.26,Z: 40.07		X:-29.27,Y: 0.38,Z: 26.44			X:-30.88,Y: 5.25,Z: 24.22		X:-16.51,Y:-39.11,Z: -1.86		X: 0.90,Y: 12.24,Z: -4.95		X: -3.88,Y: 3.30,Z: 43.25			X: 18.23,Y: 34.53,Z: 20.72		X:-15.70,Y: 1.92,Z: 23.86		X: 36.48,Y:-18.27,Z: 4.25			X:-33.31,Y: -2.66,Z: 25.67		X:-26.43,Y: -4.66,Z: 33.83		X: 25.95,Y: 22.06,Z: 28.91		X:-21.33,Y: 30.79,Z:-17.57		X: -4.08,Y: 15.09,Z:-41.14		X: 6.89,Y:-28.22,Z: 32.43
Entity Total	105		197			204		90		76		156			111		225		159			50		76		58		19		22		34
Concept Total	6		34			27		10		6		5			3		10		5			16		23		3		7		6		2
Pvalue	<0.001		<0.001			<0.001		<0.001		<0.001		<0.001			<0.001		<0.001		<0.001			<0.001		<0.001		<0.001		<0.001		<0.001		<0.001
NEScore	4.068		3.743			3.669		3.478		3.313		3.423			3.511		3.558		3.633			3.072		2.776		2.835		2.558		2.605		2.477
Entity (gene)	Entity/Concept	Enrichment	Entity/Concept		Enrichment	Entity/Concept	Enrichment	Entity/Concept	Enrichment	Entity/Concept	Enrichment	Entity/Concept		Enrichment	Entity/Concept	Enrichment	Entity/Concept	Enrichment	Entity/Concept		Enrichment	Entity/Concept	Enrichment	Entity/Concept	Enrichment	Entity/Concept	Enrichment	Entity/Concept	Enrichment	Entity/Concept	Enrichment	Entity/Concept	Enrichment
Concept	cenpa	2266.595224	dmp1	8.87833	470.590919	col10a1	648.320733	robo1	2169.879362	mfap2	2641.890447	arpc3	10.0554	1064.082503	ptprz1	1683.504045	tnc	784.151012	tek	10.8928	1901.274978	phex	2336.101963	dmp1	1427.818531	cdc20	3509.152374	arsb	2140.948232	trappc10	2056.490220	plod2	4790.951964
	chaf1a	1345.958813	ibsp	8.84747	460.632080	col2a1	591.881089	robo2	2103.812696	fbn2	2260.149830	arpc5	10.0109	1031.776284	ptprb	1509.524531	adamts2	387.918513	kdr	10.8251	1814.226495	acvr1	1081.530043	ibsp	362.034509	nek2	1800.553144	hs2st1	1714.381539	trappc13	939.131601	plod1	4037.480180
	mis18bp1	1278.482472	sp7	8.7345	425.937883	ihh	557.709956	slit2	2057.503311	adamts17	1628.115208	brk1	9.64463	800.428877	ptprk	1475.384237	bmp1	288.464705	tie1	10.3078	1267.560326	alpl	667.389429	sh3bp2	271.523615	mad2l1	1664.470539	chst11	1217.880194	uso1	690.522454	papss2	178.898219
	cenpi	1228.799557	runx2	8.63992	398.909683	hspg2	399.017517	col4a5	1069.772349	ltbp1	1467.496793	cdc42	9.57697	763.758172	ptpn12	1456.943164	serpinh1	263.123904	angpt1	10.2893	1251.392181	dmp1	557.941233	omd	257.790278	ppp1cc	473.696837	chst15	1215.306122	tbc1d14	614.813242	col4a1	125.571315
	mis12	1170.529965	bglap	8.26412	307.431820	mmp13	347.180736	cd2ap	801.396606	emilin1	1047.714087	actr2	9.21312	593.506529	ptprs	1331.075757	col1a1	190.583722	flt4	9.27134	617.947662	fam20c	455.833626	fam20c	243.954843	mxd3	353.640078	ust	767.896915	ykt6	499.288712	fkbp10	124.072009
	cenpt	1117.382491	dcstamp	8.24928	304.284735	hs2st1	270.665253	srgap1	783.763632	efemp2	972.639973	mmp14	8.95076	494.820433	ptprg	1196.323750	col3a1	178.706659	angpt2	9.2464	607.356690	galnt3	196.387196	dlx3	193.956130	bub1	351.687076	ndst1	375.599825	zw10	492.360768	col1a2	106.763847
	ino80	1047.295918	matn3	8.19941	293.947310	adamts3	248.406650	srgap2	613.427803	thsd4	641.903875	rac2	8.76876	436.173033	ptprd	1175.260610	col1a2	168.431651	ptprb	8.74644	429.479281	bmp4	108.197280	phex	156.669735	plk1	317.137970	sumf1	255.965638	rab43	297.540146	col5a1	105.542018
	oip5	1030.933207	ctsk	8.15627	285.286271	adamts4	228.284518	antxr2	373.766962	eln	468.284595	rac3	8.75655	432.497778	ptpn6	1010.170864	postn	157.301389	dll4	8.5715	380.434521	pigt	100.589870	runx2	130.826576	mad1l1	308.131861	gusb	175.789644	cog2	231.049060	tnc	83.702272
	smc2	1001.876468	tcirg1	7.98693	253.692014	sdc3	211.613550	tbc1d8b	214.372672	loxl1	254.507680	cyfip2	8.67445	408.574145	csk	833.207752	plod2	134.086447	rasip1	7.8088	224.224518	lrp4	100.589870	panx3	118.185895	rae1	249.264720	chsy1	156.944613	zwilch	183.102048	serpinh1	82.850493
	ncapg	949.461364	sh3pxd2b	7.84366	229.707681	matn1	183.989247	unc5b	98.101708	sh3pxd2b	183.102048	sh3pxd2a	8.50986	364.521659	ptpn4	641.556022	col5a1	132.835377	cdh5	7.53717	185.743776	rarg	84.288972	alpl	109.538848	mastl	230.428256	ext1	90.666913	nbas	173.984200	col1a1	66.545355
	cenph	926.800079	ihh	7.7875	220.937693	slc35b2	159.358415	slitrk2	93.265123	col6a1	177.254144	afap1l1	8.44218	347.815729	ptprm	637.874878	nid1	130.107449	pgf	7.35975	164.249698	slc20a2	70.837562	sp7	106.495418	cdk1	201.190180	hspg2	64.506367	bet1	152.259937	col6a1	60.461786
	acot8	859.669352	ostm1	7.64199	199.740945	matn3	151.863774	magi2	89.448719	col6a3	155.405369	tiam1	8.2902	313.038285	ptpn13	508.041530	adamts14	122.826002	ephb4	7.33677	161.654595	dkk1	70.547162	fkbp10	90.720080	ube2c	185.160513	hexa	14.676152	kdelr1	115.524530	cthrc1	60.162103
	ncapd2	803.380261	phex	7.63384	198.615954	ext1	149.117340	podxl	76.459174	col6a2	140.788043	diaph3	8.19958	293.980780	fyn	326.673035	lum	117.571547	pecam1	7.21139	148.198301	mef2c	47.452012	fam20a	80.188294	gmnn	100.984970	glb1	13.547285	kdelr2	115.524530	col3a1	56.709231
	ncapg2	732.408192	bglap2	7.61181	195.605916	runx2	147.877996	inf2	70.141034	mmrn2	108.914802	csrp2	8.17248	288.509826	lyn	297.233865	col2a1	110.555102	nrp2	7.18548	145.561270	matn3	42.796687	tnks	77.902586	knstrn	89.803193	ptprz1	6.812682	cog6	115.524530	col4a2	53.814216
	cenpl	562.907911	alpl	7.59989	193.997379	ust	143.671448	ephb3	69.314718	hspg2	86.827726	rhoc	8.01745	259.114417	mtmr6	219.691855	col5a2	105.151326	pdgfrb	7.00838	128.745298	aldh7a1	32.982473	col1a2	69.927551	net1	78.312708	selplg	6.438403	sec23a	113.821483	col6a2	38.147140
	ssrp1	559.855619	col10a1	7.55013	187.419516	col9a1	139.175413	hspg2	65.125219	mfap3l	85.940586	racgap1	7.95381	247.933601	ppif	211.802504	p3h1	104.382817	clec14a	6.33817	80.905537	lifr	31.982129	bmp4	68.785336	zw10	65.757655	ctsk	5.889064	copb1	105.978964	col6a3	28.282483
	asf1b	553.479226	ocstamp	7.49447	180.326820	ndst1	136.246984	slitrk6	64.623496	lum	78.522041	prex1	7.6847	205.742697	ppfia1	183.802208	plod1	104.349384	fli1	6.22176	74.634022	col10a1	30.579265	ifitm5	66.829611	ska3	64.995681	fgfr1	5.637784	copa	80.278420	tgm2	27.763729
	nasp	547.623477	atp6v0d2	7.43334	172.845099	chst11	133.410307	ndfip2	49.855159	adamts2	64.596580	vav1	7.53385	185.316757	ptp4a3	166.836467	fkbp10	103.170947	eng	6.20354	73.697340	bmp7	29.710333	col1a1	50.588472	prc1	50.621622	tyrobp	4.159319	osbp	58.082481	eln	25.197772
	chaf1b	515.173742	col9a3	7.37388	165.866584	papss2	129.534228	col4a1	47.455481	col4a2	55.063124	sh3pxd2b	7.40945	170.007136	grb2	163.977658	col6a1	102.097251	mmrn2	6.20192	73.614854	papss2	26.714321	fdps	44.738154	aurkb	49.466830	dmp1	3.504037	lman1	33.837703	mmp14	23.603283
	cenpo	486.897083	col9a2	7.346	162.691585	hapln1	125.130649	cdc42	45.474694	col4a1	52.561207	git1	7.24009	151.176119	ubash3b	143.239252	col27a1	102.016322	met	6.12126	69.611925	mocs2	24.267602	bglap	43.229616	cenpe	49.114278	4-sulfate	4.175881	mia3	29.627520	timp1	19.064339
	cenpu	477.377833	acp5	7.28287	155.726603	sp7	95.292844	nid1	45.282077	postn	48.754169	elmo1	7.21825	148.904698	ptp4a2	132.101523	col4a1	101.969115	fgfr1	6.08528	67.897088	sp7	23.570891	bmp7	41.483907	cenpf	48.983560	n-acetylgalactosamine-4-sulfatase	5.246389	rab5a	7.188226	hspg2	18.750967
	hat1	403.304883	col2a1	7.02778	130.488300	bmp7	88.243167	neo1	44.890443	col5a1	47.622252	nckap1l	7.17113	144.119834	sbk2	77.847189	timp1	101.743355	unc5b	6.0764	67.480615	p3h1	21.430169	postn	39.134725	tpx2	46.838294	6-o-sulfotransferase	5.377467	aspm	7.006437	col5a2	14.455564
	lcorl	331.063373	omd	6.85256	115.565166	omd	87.217882	enah	40.731764	lamb1	46.576575	acot8	7.13607	140.660440	fer	74.534058	col6a3	99.732632	plxnd1	6.05213	66.354837	runx2	20.331385	tfip11	36.764564	cdca3	45.775168	2-o-sulfotransferase	5.762834	trappii	3.775944	col11a1	14.443962
	msi1	285.634225	slc26a2	6.77817	109.757003	acvr1	84.365062	col4a2	38.244877	col3a1	42.270516	ncf4	7.10208	137.384901	mcu	60.987907	tnmd	91.848417	angptl2	5.97735	63.003137	ndufb8	19.709924	bmp1	30.497947	usp24	37.773004	4-o-sulfotransferase	5.857171	trappi	3.799285	postn	14.099302
	cenpe	212.211699	ext1	6.69117	103.333629	slc26a2	83.843734	nrp2	34.827186	tnc	36.216051	dock7	6.99462	127.523858	csf1r	59.663761	col4a5	90.954164	hey1	5.57051	47.521667	fam20a	19.182794	vav1	28.820875	zwilch	36.118712	maroteaux-lamy	5.910924	trapp	3.962474	col10a1	12.784333
	nuf2	209.333679	pth1r	6.66237	101.291666	col11a2	82.201482	cmip	33.510766	col5a2	35.764902	coro1b	6.96677	125.085137	efna3	59.654464	col11a1	90.280953	jag1	5.56065	47.198022	ifitm5	18.708885	p3h1	27.352279	skp2	29.897737	mucopolysaccharidoses	6.182345	trappiii	4.051861	setd2	12.710717
	kif4	188.630240	afap1l1	6.59897	96.936378	col9a2	78.510691	plxna4	31.956157	col1a2	30.607973	nhsl1	6.79474	111.024927	ptk2	56.367601	loxl1	85.349559	notch4	5.5584	47.124397	fgfr1	18.398889	trip11	24.271215	ckap2	29.279666			dsl1	4.474939	mmp13	11.741918
	ipo9	183.102048	postn	6.48852	89.792185	nid1	77.601929	ecscr	30.901814	npnt	27.471450	myo10	6.55644	94.120767	abl1	56.051729	col4a2	85.323495	ccm2	5.47371	44.437593	tcirg1	17.641356	dkk1	22.135032	sufu	27.840785			golgi-er	5.168154	bmp1	10.370889
	bub1	143.186878	dkk1	6.3559	81.906305	lum	77.136795	plxna1	29.618229	bmp1	27.445198	dlg5	6.50584	90.876486	fes	54.284262	eln	84.164893	apln	5.41203	42.577762	tmem176b	16.971460	pygl	22.008068	cks2	27.106494					mmp2	8.144258
	mad2l1	114.018813	col1a1	6.31982	79.882917	gnai3	76.927465	tenm3	28.079135	col18a1	25.768274	ncf1	6.3092	79.297557	sh3bp2	53.504520	cthrc1	82.998112	vash1	5.41052	42.533389	sfrp4	16.721170	slc10a7	18.177812	ncapd2	23.789729					mmp9	6.880049
	spc24	100.206309	col9a1	6.25347	76.292672	xylt2	70.540827	ntng1	26.556054	col1a1	22.423238	arhgef26	6.26818	77.074229	ppfibp2	48.767669	col6a2	81.534151	plcg1	5.3707	41.375375	fgfr3	14.363031	serpinf1	16.168983	cdt1	20.199564					hif1a	5.107126
	cenpf	97.435924	ifitm5	6.2122	74.140772	col1a1	66.192191	fyn	24.397330	tgm2	21.930177	dock4	6.23532	75.338774	sbf2	48.416672	ltbp1	81.479075	aplnr	5.32444	40.069840	ibsp	13.640816	slc20a2	15.824062	smc2	19.444989					smad3	4.911849
	zwilch	94.129912	sh3pxd2a	6.1798	72.494327	tnmd	65.135364	tjp1	24.084663	pofut2	18.402492	pfn1	6.23437	75.288948	ptprv	48.318945	hspg2	79.569385	hif1a	5.20451	36.873518	bmp1	12.911622	ctsc	15.153025	nusap1	18.468160					stat3	3.652727
	plk1	93.013391	p3h1	6.13481	70.268501	chadl	64.585573	sema5a	22.503142	mmp12	18.401845	swap70	6.2218	74.635839	sdc3	47.559127	emilin1	73.746687	plvap	5.10391	34.389730	col1a2	12.381389	bmp3	14.757837	anapc1	17.062978					col2a1	3.410460
	aurkb	91.080981	fam20c	5.99582	63.814981	ptprz1	62.898037	sema6d	21.810264	heg1	17.033711	inf2	6.0825	67.766295	met	46.281431	mmp13	71.821095	krit1	4.99122	31.805781	dcstamp	10.662113	lrp4	13.368622	spc25	16.773775
	zw10	85.740488	bmp7	5.94025	61.403540	col11a1	61.376854	pbrm1	20.316523	col24a1	16.894091	srgap1	5.96196	62.334730	eml4	45.963893	mmp14	71.644757	epha2	4.88745	29.598355	ext1	10.339536	scarf2	12.735943	cdk2	16.727643
	spc25	77.505057	col11a2	5.85462	57.865191	papss1	60.674366	sema7a	19.078819	bmp7	16.583954	rhof	5.87374	58.636845	heg1	44.891774	col24a1	70.369321	gipc1	4.88639	29.576767	col1a1	9.867891	ctsk	12.702129	mcm3	16.065791
	dot1l	77.362026	matn1	5.81805	56.416777	cxcl14	60.084264	clec14a	16.465930	col25a1	16.357771	arhgap12	5.83912	57.246558	ptk7	42.507774	mmp2	68.079965	cldn5	4.6802	25.637852	gnptab	9.457964	ntm	11.136079	dtl	14.815160
	btaf1	75.319227	mmp14	5.68751	51.536219	fgfr3	59.904499	cd93	14.747080	lama4	14.881437	adam12	5.81338	56.234271	pald1	42.462103	smad3	67.757372	angptl4	4.6719	25.490648	fkbp10	8.068228	ptch1	10.662764	senp2	13.483007
	lap3	66.351023	bmp3	5.67603	51.127662	gpc1	56.605692	plxnd1	14.272394	omd	14.827907	efhd2	5.76738	54.469449	slitrk2	39.659424	col11a2	64.019788	pdgfa	4.6334	24.819440	col9a3	7.237675	fhl2	10.558838	gpc1	11.195166
	aspm	64.504934	myo10	5.6551	50.391239	ibsp	56.221770	ext1	13.083400	gfm1	14.276492	grb2	5.7408	53.475336	tek	34.720819	col25a1	62.242382	rtn4r	4.61578	24.518173	bglap	7.001762	plcg2	10.277488	top2a	10.913887
	lmf2	56.245839	slc10a7	5.56516	47.345520	pth1r	53.280086	stab1	13.068166	psd3	14.214339	ralb	5.67643	51.141751	mapk1	32.777945	adamts3	61.386101	vwf	4.58909	24.068696	sgk3	5.707664	bglap2	10.214828	ccna2	10.282215
	net1	55.290758	mmp13	5.49779	45.185513	panx3	53.091393	hs2st1	12.869260	scube1	14.116980	fap	5.6297	49.511802	dusp22	31.773484	omd	60.361745	s1pr1	4.55486	23.504417	pth1r	5.371309	gdf11	10.052427	e2f8	9.515891
	mad1l1	55.238096	lcp1	5.4789	44.597703	chsy1	51.808634	ptprm	11.167487	adamts1	13.172162	ect2	5.61139	48.887461	epha2	30.056677	col9a2	57.815318	mmp14	4.54997	23.424829	hey1	4.289244	nes	10.002675	birc5	8.944077
	mcm2	52.685837	hivep3	5.39898	42.194404	alpl	50.283862	npnt	11.002038	col11a1	12.766145	dock11	5.53981	46.521142	stat3	27.019472	col26a1	57.184170	csf1r	4.54505	23.345060	col2a1	4.202358	smpd3	9.894393	cdkn3	8.192489
	racgap1	50.641397	fkbp10	5.38188	41.697170	galnt3	49.694649	myo5a	10.253945	col27a1	12.443886	fscn1	5.52893	46.171636	efnb1	25.484292	h2-ab1	56.421334	slit2	4.51635	22.885277	hspg2	3.977345	dlk1	9.653551	racgap1	7.531604
	cdca8	45.271681	col1a2	5.33446	40.348947	bmp3	47.232598	vangl2	9.954159	mmp13	9.901933	snx18	5.48093	44.660712	vav1	23.755607	col28a1	56.348328	pdgfd	4.48893	22.454497	tek	3.637779	mpped2	9.631242	ccnb2	7.450423
	tpx2	45.034428	swap70	5.32812	40.172118	col27a1	45.302905	kdr	9.712904	dchs1	9.326150	kdelr2	5.38183	41.695759	unc119	23.741111	col13a1	54.744885	cd93	4.48757	22.433289	por	3.484477	serpinh1	7.425644	ncapg	6.834618
	dlgap5	42.748336	ptpn12	5.23554	37.675144	bglap	44.830944	col27a1	9.361585	kif3b	8.987251	myo5a	5.37864	41.603838	rtn4r	22.209278	col18a1	53.149436	ecscr	4.39947	21.104396	kif5b	3.255039	mmp14	6.890999	tfdp1	6.815790
	fen1	40.161507	sh3bp2	5.21005	37.015404	tnc	44.689864	acsl4	9.069625	mmp2	8.979252	pi4k2b	5.3721	41.415514	plcg1	20.811940	hapln1	51.967307	setd2	4.34756	20.358469	mmp13	3.126339	galnt3	6.669022	kif20a	6.624181
	pola1	39.895850	bmp4	5.19195	36.553733	slc35b3	43.397917	mafb	9.002925	col11a2	8.521912	ppfia1	5.33053	40.239251	sbf1	20.792417	col9a3	50.772616	prdm6	4.29447	19.622966	rickets	4.189016	ror2	6.529396	ect2	6.232070
	cdc20	39.171288	ufsp2	5.15551	35.642144	bmp4	41.938422	pfn1	8.184235	adamts3	8.300467	enah	5.2318	37.577656	tie1	19.529737	col10a1	49.595341	mtor	4.23515	18.832446	hypophosphatemia	4.547799	mmp2	6.516542	e2f1	5.879707
	setdb1	38.865571	dlx3	5.11302	34.607776	mt3	40.357421	smpdl3b	8.182766	timp1	7.378402	rhod	5.15158	35.545196	inpp5d	18.808823	mmp9	48.790884	hspg2	4.21876	18.619712	osteomalacia	4.681226	pth1r	6.245140	fap	5.807821
	eng	38.242482	ebp	5.11166	34.574968	col9a3	39.415106	pecam1	8.052870	spon2	6.939660	mmp2	5.09849	34.260866	cdc42	18.807454	usp45	48.617483	lama4	4.2049	18.441679	hypophosphatemic	4.705651	slc39a13	6.096945	rrm2	5.021006
	ska3	36.047057	prrx1	5.0169	32.377001	gsto1	39.213960	plvap	7.485866	mmp14	6.820749	ptk2	5.09603	34.202412	cdc25a	18.279689	col9a1	46.395034	ephb3	4.19394	18.302161	rachitic	4.905069	notum	6.078130	cenpa	4.932586
	kif20a	35.107433	farp2	5.0067	32.148864	chst15	38.880580	bmp7	6.952282	nsun2	5.986968	chn1	5.0683	33.551413	bdp1	18.229782	ptprz1	46.288951	fgfr3	4.18492	18.188120	bowing	4.951053	fgfr3	5.903529	mcm2	4.485024
	ccnb2	34.109603	inf2	4.97356	31.418859	prkg2	38.276025	adam10	6.879192	nid2	5.922641	crispld2	4.98035	31.567116	grb14	18.166905	gdf11	43.773863	adamts1	4.18363	18.171763	hypophosphatasia	5.028704	fgfr1	5.879269	mcm4	3.896271
	cdk1	31.946283	panx3	4.93345	30.557502	dmp1	35.049164	git1	6.576513	plod1	5.805857	cit	4.9562	31.043162	slc25a3	17.261097	nrep	43.010123	robo1	4.15229	17.781279	craniotabes	5.448577	mia3	5.566765	chek1	3.279167
	atad2	29.527213	galnt3	4.92866	30.456028	adamts1	29.923395	col9a3	6.085030	nes	5.789682	arhgap9	4.92646	30.409628	kdr	16.329630	lamb1	40.445450	mmp9	4.0769	16.875999	fibrodysplasia	5.994625	plod2	4.801072
	elp3	28.623968	csf1r	4.9259	30.397965	bcan	28.802504	csk	5.766006	stab1	5.617015	twf1	4.88457	29.539368	arhgap12	15.923289	pdgfrb	39.892217	serpinf1	4.07661	16.872625	progressiva	5.998688	mmp9	4.559006
	setd2	27.973879	papss2	4.91624	30.195124	col1a2	28.152775	elmo1	5.754912	adam9	5.320412	myo1b	4.85079	28.855822	git1	13.669738	matn3	39.819013	mmp2	4.06502	16.737634	ossificans	6.022599	tnmd	4.425809
	hdac2	24.858597	fam120a	4.8755	29.354233	timp1	27.668335	dll4	5.670939	hapln1	5.244476	ptpn12	4.73576	26.644384	magi2	13.613796	lama4	39.672388	bmp4	4.05388	16.608827	enthesopathy	6.112581	acvr1	4.358149
	top2a	24.606326	cdc42	4.82939	28.430925	epyc	26.096480	mmp9	5.494790	adam12	4.909919	srgap2	4.65777	25.242332	znrf3	13.512201	ibsp	39.562849	emb	3.96307	15.595624	phosphaturia	6.512373	mcam	4.357462
	prc1	24.215889	tyrobp	4.80387	27.932533	kera	25.659756	epha2	5.279965	nid1	4.849978	capza1	4.59713	24.203224	irs1	13.484115	loxl4	39.465923	ptprz1	3.92794	15.220478	buchem	6.777754	gnai3	4.171412
	kif23	23.711210	serpinf1	4.66891	25.437912	prrx1	24.977852	mmp2	5.267632	mmp9	4.692477	evl	4.58541	24.007472	cdkn3	13.466889	adamts4	38.313231	tnc	3.90289	14.958492	hypervitaminosis	7.186809	lum	3.932020
	ube2c	23.456685	fgfr3	4.6648	25.365633	igf1	20.797097	nrip1	5.115266	col2a1	4.674086	dock10	4.56389	23.651933	il1rap	13.349547	mfap2	36.703787	mcam	3.89783	14.906102	periarthritis	7.544743	strap	3.926818
	mxd3	23.093689	bmp1	4.65935	25.269980	cd44	20.703234	angptl4	5.014189	itga8	4.519910	lcp1	4.52645	23.046016	grb10	11.855124	itga8	35.529452	mon2	3.7809	13.745611			pdgfa	3.698223
	smchd1	22.042288	bglap3	4.61486	24.502537	postn	20.463052	lamb1	4.932293	serpinh1	4.512488	mmp9	4.51584	22.877163	nes	11.435589	mmp12	34.348992	scube2	3.71243	13.108502			tcirg1	3.395115
	trim28	20.987073	git1	4.58692	24.032617	col6a1	20.246878	tek	4.899856	col4a5	4.394708	cd2ap	4.47275	22.204043	npnt	11.269839	pecam1	33.748249	nid2	3.69005	12.906723			col10a1	3.370870
	hells	20.525617	sfrp4	4.54582	23.357540	mmp9	20.075110	col9a1	4.811419	slit2	3.563709	map4k4	4.31338	19.881901	col25a1	11.121027	fbn2	33.413155	mst1r	3.60546	12.171695			mmp13	3.367957
	nrp2	19.591725	igf1	4.51418	22.850850	wnt5b	20.031445	cdh15	4.809877	lefty1	3.481553	arap1	4.31146	19.855401	dusp4	11.048236	nid2	30.889715	abl1	3.60472	12.165433			plcg1	3.355428
	pbk	18.174143	ephb4	4.46609	22.101743	phex	19.565289	ndst1	4.575416	smad3	3.346079	plekho1	4.26592	19.238460	unc13a	9.955591	matn1	30.773246	plxna1	3.56079	11.800631			smad3	3.123346
	rad51	16.712875	cthrc1	4.45725	21.966773	adamts9	18.886099	xylt2	4.483707	cthrc1	3.276755	rab5a	4.24765	18.996352	cd53	9.563213	pdgfa	30.099234	rspo3	3.53705	11.607998			cd44	3.094254
	esco1	15.103049	cd44	4.40093	21.125701	mmp14	18.412293	vash1	4.399519	plod2	3.235603	s1pr1	4.23851	18.876344	pdgfrb	9.499765	csrp2	29.869439	stat3	3.47238	11.099135			atp6v1c1	3.064517
	kif15	14.894740	plekho1	4.36557	20.614187	spry1	17.839472	grb2	4.357343	fscn1	3.094713	kif5b	4.23611	18.845032	pth1r	9.372577	runx2	29.114165	sema5a	3.45755	10.985697			wnt5b	3.050943
	diaph3	13.886641	diaph3	4.15796	17.851390	bglap2	17.769439	enpp3	4.307540	vwf	3.000458	wdr91	4.16608	17.952034	actn1	9.309243	bmp7	28.809873	grb14	3.40552	10.596518			abl1	3.005907
	lbr	12.949794	mmp9	4.12719	17.474625	dkk1	17.653927	ptprd	4.284845	microfibrils	3.271853	rnd1	4.13262	17.540556	aacs	9.128661	aebp1	28.665240	cdc42	3.35532	10.234127			dentin	3.784533
	knstrn	12.694086	cbfb	4.07806	16.889612	gpr22	16.813478	itga8	3.968208	microfibrils	3.287215	s1pr3	4.07772	16.885601	ephb3	8.861182	rspo3	28.361937	bcl6b	3.35057	10.200540			dentin	3.794208
	top2b	12.333681	kera	3.98343	15.817333	fgfr1	16.631717	angptl2	3.942272	microfibril	3.778932	pld2	4.03562	16.399935	sorbs2	8.708512	sec23a	27.436540	sema7a	3.2398	9.446622			odontoblasts	3.813195
	mcm5	12.213282	pecam1	3.89367	14.863181	cbfb	16.380412	cdh5	3.838776	fibrillin	3.934599	farp2	3.94082	15.356941	zdhhc5	8.340770	sec24d	27.119604	mt3	3.2352	9.416564			odontoblasts	3.841343
	mcm3	11.301251	slc20a2	3.86669	14.587750	col3a1	16.279339	rac2	3.790098	megalocornea	4.691090	cerk	3.90902	15.022111	tnc	8.124319	adamts1	27.088490	spred1	3.20497	9.221282			tooth_root	3.866086
	nup133	10.862516	acvr1	3.84406	14.360710	trip11	15.890475	col6a3	3.676172	luxation	4.712198	ptk7	3.82319	14.154556	mertk	7.985801	cdh11	26.868859	mef2c	3.09951	8.571279			dentition	3.919739
	rad18	10.858271	fgd6	3.7481	13.436621	ptch1	15.804752	ptprb	3.469937			rap1b	3.76632	13.607409	plcg2	7.556698	cd68	26.688250	rap1b	3.08187	8.467118			dentition	3.933510
	nusap1	10.242570	npnt	3.73108	13.279092	adamts14	15.521987	cd68	3.443009			abcf2	3.71505	13.132292	col6a1	7.302777	fap	26.545832	lfng	3.04694	8.264553			dental_papilla	3.994406
	mcm4	9.960019	lrrc17	3.71945	13.172447	mmp2	14.472625	apln	3.331080			myo18a	3.70938	13.080830	map2k4	7.290686	kera	26.361657	grb2	3.00662	8.036796			tooth_germ	4.059438
	rrm2	9.930648	wnt5b	3.70108	13.005770	selplg	14.426837	timp1	3.321295			fyn	3.67036	12.731763	pld2	7.189212	flt4	25.873269	s1pr3	2.98721	7.929406			odontoblast	4.184072
	brf1	9.551523	smpd3	3.68048	12.821364	kazald1	14.286975	col5a1	3.247866			vps35	3.59161	12.055450	flt4	6.757096	dmp1	25.630391	ihh	2.93399	7.642223			dentition_permanent	4.294416
	kif22	8.630314	plcg2	3.64458	12.506276	runx3	14.184154	ptpn6	3.110334			slit2	3.5757	11.923203	fgfr1	6.661312	efemp2	25.434472	postn	2.91873	7.561804			cementum	4.374780
	msh3	7.845087	cdh11	3.61271	12.233051	ctsk	14.084923	gne	3.058978			ppp1r9b	3.55404	11.745559	sec16a	6.639163	itga2	24.626451	pald1	2.89399	7.433234			dentinogenesis	4.542435
	mastl	7.730471	csk	3.60296	12.150624	mef2c	13.981529	notum	3.051109			cnn2	3.49051	11.239534	cad	5.838539	adamts9	23.907608	tjp1	2.85861	7.253165			maxilla	4.662429
	birc5	7.713573	rac2	3.50923	11.386321	alpk1	13.914586	slit	4.617931			actn1	3.46484	11.041332	fcer1g	5.570902	adam12	22.961531	epn1	2.84795	7.199742			maxilla	4.664182
	mbd3	6.729198	col11a1	3.45203	10.943691	adamts2	13.797728	glomerular_basement	5.514742			notum	3.42838	10.765808	hspg2	5.298094	serpinf1	22.657066	exoc3l2	2.84759	7.197980			tooth_deciduous	4.857519
	ccna2	6.680181	col24a1	3.43979	10.851227	sumf1	13.655103	nephrin	5.786581			cd44	3.42705	10.755856	rac3	5.138356	bcan	21.927857	rasa3	2.83028	7.112102			hers	5.038048
	cdkn3	6.420394	entpd5	3.39418	10.513563	col5a1	13.503639	robo	5.892102			shank3	3.3857	10.451944	cdk1	5.100926	mmp16	21.599007	ptpn6	2.80899	7.007932			caries	5.216892
	ddb1	6.293944	ptprv	3.37887	10.402548	col18a1	13.479781	slit-robo	6.013304			cotl1	3.37596	10.381609	ephb4	5.085192	vit	21.074932	arnt	2.78096	6.873076			dental_sac	5.287080
	baz1b	5.981745	ror2	3.35233	10.212942	p3h1	13.380413	roundabout	6.216567			commd3	3.26991	9.645869	arsb	4.737206	mia3	20.963589	col4a1	2.74492	6.703537			dental_cementum	5.690737
	nek2	5.886461	fgfr1	3.30064	9.853494	arsb	13.106066	alport	6.425099			ptprb	3.25896	9.572914	dnaja2	4.717178	col20a1	20.726971	mertk	2.72924	6.631080			diastema	5.818485
	mybl2	5.144701	mafb	3.29337	9.804016	fam120a	12.730740	hyalinosis	6.876064			ocstamp	3.25271	9.531556	rhoc	4.713105	sp7	19.657382	sema6d	2.71958	6.586807			fillings	7.024428
	ect2	4.979233	tnc	3.29248	9.797969	bmp1	12.523647	bowman_capsule	6.886125			wdr81	3.22748	9.366278	ror2	4.666585	pdgfd	19.457756	timp1	2.64803	6.268089			cherubism	7.225298
	dtl	4.883621	rhof	3.28846	9.770683	bmp8a	12.201051	robo-slit	7.094051			robo1	3.22306	9.337631	mcam	4.398303	alpl	17.627353	itgb3	2.64523	6.255960
	e2f1	4.429964	epyc	3.28606	9.754443	smad3	12.179631					prc1	3.21854	9.308427	pik3r3	4.382715	pcsk7	17.369222	ndst1	2.62232	6.157380
	myb	4.152612	clasp2	3.28569	9.751966	isyna1	12.177044					ror2	3.19957	9.186840	mapk6	4.076325	tgm2	17.103102	lyn	2.60186	6.070702
	suv39h2	4.026453	prkg2	3.2671	9.627105	tapt1	12.118289					dapp1	3.16778	8.986654	fgfr3	3.810181	bglap	17.076982	ctbp2	2.58799	6.012603
	cse1l	3.624732	rgs12	3.21846	9.307913	sec23a	11.663194					kif23	3.16385	8.962189	rac2	3.791220	ctsk	16.873148	plod2	2.58789	6.012193
	ccng1	3.407634	hey1	3.20634	9.230079	itm2a	11.031723					map2k4	3.14541	8.848364	ppa1	3.785672	hhip	16.277716	vav1	2.52951	5.773754
	h2a-h2b	4.722298	slc37a2	3.20215	9.203291	rarg	10.856568					sorbs2	3.06921	8.393159	bmp1	3.418442	spon2	16.115316	col4a2	2.52809	5.768077
	cenp-a	4.786196	rtcb	3.19624	9.165699	igfbp4	10.671626					abl1	3.06859	8.389558	selplg	3.363308	dkk1	15.191073	edil3	2.52734	5.765094
	mis18	5.070126	atp6v1c1	3.13683	8.795914	ror2	10.463355					poldip2	3.03515	8.197286	pecam1	3.322546	vwf	15.115558	efna3	2.52013	5.736321
	caf-1	5.360378	trip11	3.12742	8.738698	slc10a7	10.459473					lyn	3.03139	8.175989	ncf1	3.218988	ccna2	15.048033	nrep	2.49126	5.622704
	condensin	5.695861	tmem64	3.09973	8.572564	col5a2	9.647361					plcg2	2.9847	7.915597	ano1	3.143463	igf1	14.927734	acvr1	2.46351	5.515570
	isw1	5.832558	lrp4	3.07841	8.446833	col6a3	9.606608					plcg1	2.90464	7.488290	acvr1	3.139829	ihh	14.582832	lifr	2.42888	5.384738
			mmp2	3.0516	8.291308	cntrl	9.481178					rap1gap	2.80739	7.000161			cd44	14.327205	fyn	2.4188	5.347260
			igfbp4	3.05102	8.287989	adam12	9.356291					aif1l	2.73609	6.662610			angptl2	14.235269	igf1	2.41417	5.330135
			plod2	3.04004	8.225113	cthrc1	9.034255					akt2	2.71965	6.587109			s1pr3	14.099058	ptk7	2.33208	5.035305
			jag1	2.99342	7.963622	ifitm5	8.920694					mtor	2.69774	6.487839			edil3	13.931785	igfbp3	2.32358	5.005717
			rab44	2.95318	7.744553	slc20a2	8.876584					stmn1	2.69319	6.467400			ifi30	13.864917	podxl	2.28519	4.874281
			fam20a	2.88339	7.378831	pkdcc	8.843559					igf2bp3	2.64957	6.274799			bmp4	13.601121	lum	2.27287	4.832832
			igf2	2.8752	7.337046	nid2	8.820650					net1	2.60453	6.081926			adamts17	13.282094	cd68	2.26959	4.821868
			mef2c	2.85392	7.229633	sec24d	8.693239					vps29	2.58781	6.011844			sfrp4	12.941624	cd44	2.26551	4.808252
			adam12	2.83748	7.147715	mmp16	8.469238					vangl2	2.51586	5.719369			c1qtnf3	12.576323	gnaq	2.23148	4.696152
			irx5	2.8248	7.085164	smpd3	8.219623					ppp1cb	2.50618	5.681150			mcam	12.005562	flrt2	2.22759	4.683501
			bmp8a	2.80758	7.001112	mfap2	8.165261					csk	2.49677	5.644211			npnt	11.256182	adam10	2.22636	4.679513
			sdc3	2.7659	6.801730	hif1a	8.114237					rai14	2.47802	5.571321			mamdc2	11.156971	ptk2	2.2227	4.667647
			cd68	2.75251	6.738882	crispld1	8.042792					tjp1	2.45671	5.489635			penk	11.059938	plxna4	2.22099	4.662131
			sec24d	2.74902	6.722607	fbn2	7.915827					lrp12	2.44118	5.430867			xylt2	10.945982	e2f8	2.21724	4.650023
			gusb	2.74631	6.709965	tgm2	7.881606					lpar4	2.41805	5.344486			itga9	10.194186	amotl1	2.20499	4.610701
			lifr	2.74377	6.698198	podnl1	7.874224					inpp5d	2.24917	4.754091			podnl1	10.115967	nid1	2.1788	4.527762
			pkdcc	2.71998	6.588646	git1	7.865877					met	2.23565	4.709739			ptk2	9.318635	igf2	2.16698	4.490816
			akap12	2.70178	6.506052	lamb1	7.836853					adam9	2.17863	4.527227			lrrc17	9.297354	kras	2.15847	4.464399
			serpinh1	2.69835	6.490588	col4a1	7.674688					mapk1	2.1257	4.364156			cxcl14	8.936672	kif20a	2.13758	4.400236
			cxcl14	2.6624	6.330871	fam20a	7.628521					mapk6	2.0631	4.178840			itgb3	8.883311	adgra2	2.10509	4.302241
			ift20	2.65909	6.316324	efemp2	7.541238					ap2a1	2.03222	4.090337			igfbp4	8.753253	tnfrsf19	2.07973	4.227271
			tnmd	2.65503	6.298606	edil3	7.539067					cdh11	2.01899	4.053001			wwtr1	8.711068	rap1gap	2.07088	4.201433
			pdgfrb	2.60347	6.077454	cdh11	7.471985					pik3cb	2.00629	4.017476			kdr	8.694869	cdk2	2.05598	4.158250
			ptch1	2.60121	6.067966	sfrp4	7.400321					cdkn3	1.9613	3.894129			sema5a	8.550573	plxdc1	2.04024	4.113132
			slc39a13	2.55905	5.893201	pecam1	7.164957					copb2	1.93512	3.824102			thsd4	8.505400	ptprm	1.97131	3.921236
			rhoc	2.55297	5.868427	plod2	7.124919					dynll2	1.88668	3.697834			igfbp3	8.488245	lpar4	1.97089	3.920111
			itgb3	2.53507	5.796032	ltbp1	7.110702					nusap1	1.88456	3.692393			tns3	8.446205	ccna2	1.94724	3.856355
			plod1	2.53401	5.791801	acp5	6.964258					plxna1	1.8793	3.678968			jag1	8.409656	marcks	1.94184	3.841958
			gsk3b	2.49624	5.642136	nusap1	6.830792					fer	1.86649	3.646449			bmp3	8.393720	git1	1.933	3.818480
			spns2	2.48744	5.607825	eln	6.771245					chmp1a	1.86027	3.630748			sdc3	8.351856	adam12	1.91037	3.759056
			col27a1	2.47111	5.544718	lrrc17	6.533324					hcls1	1.84415	3.590407			cnn2	8.321693	adgrg1	1.82862	3.551972
			myo5a	2.46967	5.539179	lama4	6.477793					gna12	1.82159	3.534695			mmp23	7.799956	ednrb	1.82344	3.539236
			tubb6	2.46357	5.515811	col6a2	6.209407					fhl2	1.81815	3.526286			ror2	7.759589	birc5	1.80287	3.489147
			gjc1	2.4371	5.415502	a2m	6.186121					adgra2	1.80166	3.486202			cdh5	7.753381	mapk1	1.78917	3.456149
			grb2	2.39862	5.272990	igf2	5.936563					ppm1e	1.78517	3.446586			myo5a	7.659429	antxr2	1.77888	3.431600
			smad3	2.39764	5.269412	dlx3	5.883149					fmr1	1.77348	3.418768			srpx	7.628642	ror2	1.77462	3.421488
			hspg2	2.31114	4.962758	itga2	5.811300					itgb3	1.75635	3.378434			wnt5b	7.458909	srpk1	1.77068	3.412141
			runx3	2.26426	4.804070	ptar1	5.811061					pacsin1	1.75104	3.366006			prrx1	7.381439	ptprs	1.76402	3.396432
			adamts4	2.25617	4.777224	col4a2	5.755591					tnfaip8	1.74475	3.351377			spry1	7.072138	col1a1	1.74865	3.360436
			gnptab	2.20455	4.609300	lrp4	5.747493					pdgfa	1.74232	3.345721			stat3	6.622898	h2-ab1	1.74001	3.340378
			fhl2	2.19316	4.573062	scube2	5.627006					timp1	1.69485	3.237437			antxr2	6.622780	smad3	1.71455	3.281948
			fbn2	2.18966	4.561986	scube1	5.608792					tyrobp	1.65143	3.141450			aaas	6.588590	prrx1	1.70537	3.261123
			obsl1	2.18082	4.534119	angptl2	5.605170					akap12	1.60801	3.048314			lims1	6.216615	tpcn1	1.69046	3.227588
			tmem119	2.17142	4.504669	sh3bp2	5.515663					pik3r3	1.60329	3.038352			lman1	6.157522	spi1	1.63968	3.115966
			edil3	2.15512	4.454061	vit	5.411048					ctnnd1	1.58745	3.005167			mmrn2	6.156981	heg1	1.62917	3.093347
			angpt1	2.13177	4.382545	ccna2	5.325446					arp2	2.09984	4.286624			tjp1	5.923499	gsk3b	1.61686	3.067060
			pdgfa	2.12869	4.373217	mmp23	5.259710					invadopodia	2.16004	4.469262			pepd	5.796197	sort1	1.59945	3.030286
			vps4a	2.12283	4.355483	tenm3	5.243228					lamellipodium	2.18046	4.532992			ano1	5.585117	adam9	1.59018	3.010873
			ppfia1	2.05696	4.161078	fam20c	5.185984					invadopodium	2.26491	4.806247			pth1r	5.580429	vegfr2	1.96959	3.916581
			podnl1	2.02637	4.073795	jag1	5.017439					rac	2.27746	4.848237			fhl2	5.575585	sprouting	2.02086	4.058246
			ccr1	2.00117	4.003237	rspo3	4.967534										vkorc1	5.522859	vasculogenesis	2.13282	4.385728
			anpep	1.99004	3.972487	slit2	4.917967										actn1	5.412152	vegfr	2.1618	4.474722
			adamts1	1.98399	3.955862	adamts17	4.905615										dchs1	5.406181	tie2	2.18682	4.552996
			fkbp9	1.96987	3.917323	col24a1	4.903817										phex	5.383412
			fkbp11	1.96337	3.899708	setd2	4.872965										adam9	5.281515
			heyl	1.9433	3.845851	akap2	4.847575										cd93	5.279408
			eeig1	1.9373	3.829894	kdr	4.828596										chsy1	5.240516
			h2-ab1	1.93522	3.824360	anxa6	4.797872										fscn1	5.207869
			rspo3	1.92401	3.794763	angpt1	4.747993										hif1a	5.167051
			ostc	1.91711	3.776670	ift20	4.735276										mme	5.110575
			inpp5d	1.91175	3.762659	serpinf1	4.711610										sema7a	5.077149
			efnb1	1.91113	3.761024	hhip	4.670383										eng	4.982626
			col5a1	1.91037	3.759067	sema5a	4.656333										chadl	4.949703
			tjp1	1.89304	3.714158	hivep3	4.627081										kdelr2	4.927976
			ramp1	1.88523	3.694107	serpinh1	4.617859										gar1	4.911601
			ebf3	1.87802	3.675698	angptl4	4.534347										epyc	4.891294
			hapln1	1.87157	3.659313	slc30a9	4.472654										bglap2	4.864933
			atp6v1b2	1.86715	3.648108	notum	4.402883										flrt2	4.845433
			timp1	1.86166	3.634266	cd68	4.397555										angptl4	4.700779
			rcan2	1.85458	3.616471	gusb	4.387046										slc26a2	4.689001
			mfap2	1.84524	3.593127	ssr2	4.352700										crispld2	4.667893
			stab1	1.80532	3.495072	col13a1	4.339068										fgfr1	4.582176
			gdf11	1.79799	3.477359	emilin1	4.313860										igf2	4.533449
			hif1a	1.77395	3.419899	gdf11	4.243020										tfg	4.512194
			igfbp3	1.76987	3.410225	flrt2	4.165301										srgap1	4.462791
			notum	1.74536	3.352785	itga8	4.145644										isyna1	4.390607
			gdpd2	1.73331	3.324888	pdgfrb	4.044501										gpc1	4.367135
			usp53	1.70205	3.253630	gipc1	3.924230										cdc42	4.345253
			limd1	1.69227	3.231642	col26a1	3.910421										fut8	4.301809
			prdm1	1.66504	3.171220	mcam	3.840055										angpt1	4.283209
			kbtbd11	1.66243	3.165489	mmp12	3.836534										c1qtnf6	4.248449
			ptprz1	1.64933	3.136886	igfbp3	3.755665										apln	4.229250
			stat3	1.63821	3.112804	dot1l	3.557606										notch4	4.213267
			mtor	1.62368	3.081601	tnfrsf14	3.546015										akap12	4.206708
			dlk1	1.61737	3.068162	hey1	3.481680										chst11	4.185018
			ptpn6	1.59757	3.026337	c1qtnf3	3.453265										adam10	4.124322
			osteoblasts	1.61386	3.060703	gpd1l	3.363045										gjc1	4.082777
			osteoblasts	1.63581	3.107630	dlk1	3.291600										met	4.054032
			osteoblast	1.68735	3.220649	fam136a	3.226588										angpt2	4.043049
			osteoclasts	1.73038	3.318154	plekho1	3.180376										ifitm5	3.980830
			osteoclasts	1.73873	3.337416	stat3	3.172653										itgb7	3.948230
			bones	1.74939	3.362156	plod1	3.010480										plvap	3.919360
			bones	1.76713	3.403753	npnt	3.009461										plcg2	3.772819
			resorption	1.78876	3.455180	cartilage	3.075911										crispld1	3.743113
			mineralization	1.79749	3.476158	cartilage	3.133725										chst15	3.683081
			osteoblastic	1.87602	3.670616	chondrocyte	3.220837										tek	3.525799
			osteocytes	1.91885	3.781215	chondrocytes	3.285067										rhoc	3.498893
			osteocytes	1.9229	3.791837	chondrocytes	3.316918										ext1	3.463552
			osteoclast	1.95017	3.864209	chondrogenesis	3.591319										dlk1	3.460663
			periosteal	1.95115	3.866834	cartilage_articular	3.619876										mki67	3.399550
			metaphyseal	1.96554	3.905578	articular	3.628332										pycr1	3.385856
			osteogenesis	1.99497	3.986090	endochondral	3.812747										afap1l1	3.352953
			osteoid	1.99927	3.997987	ossification	3.903490										nfs1	3.338113
			intramembranous	2.00956	4.026604	condyle	4.085363										olfml2b	3.327621
			osteopenia	2.0766	4.218106	proteoglycan	4.146711										s1pr1	3.319111
			periosteum	2.08404	4.239926	fibrocartilage	4.209708										ift20	3.314799
			periosteum	2.09175	4.262648	fibrocartilage	4.219387										mtor	3.309104
			epiphyseal	2.09547	4.273657	temporomandibular	4.305410										dll4	3.291637
			alizarin	2.09746	4.279554	temporomandibular_joint	4.318526										txndc5	3.287378
			diaphyseal	2.22678	4.680882	condyles	4.370135										papss2	3.230076
			epiphysis	2.22754	4.683360	osteochondral	4.405822										prex1	3.134946
			sialoprotein	2.23096	4.694475	proteoglycans	4.431725										scarb1	3.011295
			osteopetrosis	2.26493	4.806298	hyaline_cartilage	4.437550										pemt	3.008112
			epiphyses	2.29051	4.892295	condylar	4.477876										mef2c	3.004166
			epiphyses	2.29172	4.896410	mandibular_condyle	4.657779										collagen	3.313661
			perichondral	2.45119	5.468671	periarticular	5.369896										ecm	3.876774
			podosome	2.5262	5.760504	heparan	5.732577										fibrillar	4.178768
			podosomes	2.56834	5.931256	pannus	6.154930										myofibroblasts	4.325106
			podosomes	2.57103	5.942327	sulfation	6.195019										myofibroblasts	4.325901
			sealing	2.5855	6.002254	syndecan	6.519044										procollagen	4.620494
																	collagenous	4.749929
																	tenascin	4.919211
																	decellularized	5.342267
																	propeptides	5.714620
