# Supplementary material for: Dasatinib and quercetin senolytic treatment delays early onset intervertebral disc degeneration in SM/J mice
Source: Bone Res. 2026 Apr 14;14:42. doi: 10.1038/s41413-026-00526-4 (PMC13076796; doi:10.1038/s41413-026-00526-4)
Supplement: Supplementary file 12 — Supplementary File 2 [file 41413_2026_526_MOESM12_ESM.xlsx]

## Sheet: Suppl. Table 2.1
Supplementary Table 2.1 Compbio outputs based on the upregulated DEGs from microarray on NP tissues; DQ vs. Control
Theme	Transcription-Coupled Nucleotide Excision Repair		CLRC ubiquitin ligase complex		ERCC2 and ERCC3 DNA helicases form an open bubble structure in damaged DNA		(-) regulation of parkin-mediated stimulation of mitophagy in response to mitochondrial depolarization		Sescence-associated heterochromatin focus		Maintenance of protease location in mast cell secretory granule		Microtubule bundle formation involved in mitotic spindle midzone assembly		(-) regulation of subtelomeric heterochromatin assembly		MOZ/MORF histo acetyltransferase complex		Tankyrase related		Premeiotic DNA replication		Polo box domain specific binding		Inhibition of the proteolytic activity of APC/C required for the onset of anaphase by mitotic spindle checkpoint componts		Activation of Ssk2/Ssk22 proteins		Oxygen-dependent proline hydroxylation of Hypoxia-inducible Factor Alpha		Paternal behavior		Sensory perception of sweet, bitter, and umami (glutamate) taste		Pore-forming toxin activity		Nicotinic cholirgic receptor antagonists		Axomal microtubule depolymerization		Corticotrophin-releasing factor gastric inhibitory peptide-like receptor activity		Mast/Basophil Degranulation		8-oxo-7,8-dihydroguani DNA N-glycosylase activity		Fibrous conctive tissue		Protein N-linked glycosylation via arginine
Thematic Enrichment Score	16887.9		14998.1		6271.06		5691.79		5242		4373.62		23996.4		23972.3		6264.94		4278.83		4195.38		3951.74		24901.1		15551.5		13376.3		9083.38		8452.41		8385.74		8055.12		7181.96		6107.04		6096.75		5382.49		5105.16		5009.61
Coordinates in 3-D Space	X:-36.76,Y:-21.64,Z: 3.66		X:-18.57,Y:-21.17,Z: 28.96		X:-40.94,Y:-17.79,Z: -1.34		X:-34.64,Y: 9.99,Z: 18.68		X:-37.47,Y: 19.40,Z: 14.85		X:-35.76,Y: -1.12,Z: 20.78		X: 18.70,Y: 22.32,Z:-30.16		X: 18.38,Y: 33.29,Z:-21.78		X: 33.46,Y: 21.26,Z:-15.75		X: 1.30,Y: 30.90,Z:-32.67		X:-27.59,Y:-15.36,Z:-31.03		X: 16.64,Y: 26.40,Z:-30.43		X: 19.70,Y: 23.50,Z:-25.55		X: 21.76,Y:-30.49,Z: 19.34		X: 10.48,Y:-28.36,Z: 0.63		X:-32.00,Y: 29.88,Z: 2.28		X: 37.29,Y: 14.02,Z: 2.31		X:-35.81,Y: 23.30,Z: 6.16		X: -2.09,Y: 4.20,Z: 42.37		X: 32.22,Y:-20.91,Z:-18.77		X: 8.98,Y: 21.42,Z: 36.14		X:-25.73,Y:-36.14,Z: -1.66		X:-27.82,Y:-29.90,Z: 11.47		X: 35.78,Y: 0.44,Z: 5.27		X:-39.53,Y: -8.11,Z: -6.46
Entity Total	3		15		8		4		10		12		7		10		5		3		6		5		6		3		4		12		4		2		7		3		3		3		4		3		4
Concept Total	40		14		9		33		10		9		27		17		20		3		5		2		38		14		33		5		16		5		16		10		10		14		8		23		14
P-Value	0.054		0.044		0.194		0.153		0.15		0.127		0.031		0.012		0.168		0.125		0.115		0.115		0.079		0.052		0.057		0.149		0.152		0.135		0.13		0.152		0.159		0.144		0.157		0.146		0.139
NEScore	1.903		2.022		1.301		1.423		1.429		1.564		2.071		2.405		1.365		1.587		1.668		1.681		1.683		1.929		1.945		1.416		1.406		1.481		1.505		1.416		1.394		1.457		1.406		1.45		1.481
Entity (gene)	Entity/Concept	Enrichment Score	Entity/Concept	Enrichment Score	Entity/Concept	Enrichment Score	Entity/Concept	Enrichment Score	Entity/Concept	Enrichment Score	Entity/Concept	Enrichment Score	Entity/Concept	Enrichment Score	Entity/Concept	Enrichment Score	Entity/Concept	Enrichment Score	Entity/Concept	Enrichment Score	Entity/Concept	Enrichment Score	Entity/Concept	Enrichment Score	Entity/Concept	Enrichment Score	Entity/Concept	Enrichment Score	Entity/Concept	Enrichment Score	Entity/Concept	Enrichment Score	Entity/Concept	Enrichment Score	Entity/Concept	Enrichment Score	Entity/Concept	Enrichment Score	Entity/Concept	Enrichment Score	Entity/Concept	Enrichment Score	Entity/Concept	Enrichment Score	Entity/Concept	Enrichment Score	Entity/Concept	Enrichment Score	Entity/Concept
Concept	ercc3	753.442820	vhl	492.261880	ercc3	537.267727	mcu	369.578682	tigar	141.322755	lonp1	83.713213	prc1	1437.912083	clec2f	1583.674516	mael	396.190985	sh3bp2	1007.902259	rem1	514.579625	prc1	681.594413	bub1b	1192.060087	bub1b	1914.837425	vhl	1022.932633	peg3	817.172723	tas2r108	765.840973	mcu	2012.314490	unc5d	494.144508	zmynd10	536.389249	slc15a2	798.703753	mcpt4	743.103411	il3	649.598054	sh3bp2	531.185842	mgat2
DNA Repair	ddb2	612.246290	hook1	251.129716	med30	17.013397	lonp1	88.226071	rgn	120.567844	spint1	76.756412	bub1b	196.726273	il3	22.089789	jade1	134.895937	mael	47.743155	mael	28.754073	bub1b	233.265474	prc1	315.787894	rgn	69.889726	p4ha3	96.573232	zmynd10	24.351728	fpr-rs6	108.799928	ercc3	34.451354	gabrg2	123.936012	hook1	471.771772	ces1c	68.213512	sh3bp2	27.133583	lonp1	57.325136	vhl	21.981998	mfng
Cell Cycle Regulation	il3	210.397086	ddb2	54.250587	trim45	12.142779	ercc3	12.137127	bub1b	79.304039	mcpt4	66.329521	clec2f	9.788940	mael	9.265081	peg3	12.633070	prc1	14.060958	prc1	18.506953	mael	23.982622	hook1	82.230705	clec2f	5.541448	nts	6.943216	mael	22.504631	chst9	11.246746	holocomplex	3.620888	tas2r108	12.911685	tas2r108	29.865101	peg3	15.748398	cd40lg	10.019616	ddb2	20.024101	mael	3.560726	chst9
Unassigned	excision	3.319331	lonp1	33.712365	peg3	9.620029	tigar	11.893713	ddb2	43.717130	habp2	43.704931	hook1	6.885860	ercc3	8.973210	irx3	4.843718			slc15a2	7.221775	irx3	14.219426	zmynd10	46.274837	ssk1	2.705908	jade1	5.916757	jade1	20.116721	zmynd10	4.702165	emre	3.651251	syp	9.586981	axomal	4.083715	linkers	4.855383	mast	3.598375	tigar	4.336302	cherubism	3.435482	impg2
	repair	3.613329	clec2f	29.238596	spint1	5.858266	mitochondria	3.135260	ercc3	27.532888	tmprss11b	29.677235	zmynd10	5.718079	bub1b	8.301079	tas2r108	3.220445			bub1b	5.184122	ddb2	11.466556	clec2f	35.181107	pbs2	2.712425	pheochromocytoma	3.304625	vhl	18.536929	bitter	3.889933	pore-forming	3.700012	nts	7.556787	deformed	4.152254	glycol	5.154106	mast	3.604364	abasic	3.640326	mandible	3.566795	glycosylation
	xeroderma	3.728461	spint1	21.457051	lonp1	5.790881	uniporter	3.159985	prc1	9.035259	mgat2	24.154147	rem1	3.646751	ddb2	7.937100	nurse	4.403545			peg3	3.875785			vhl	6.666167	hog1	2.856495	von	3.389807	unc5d	15.910264	chemosensory	4.084006	uniplex	4.799477	gprin3	4.577858	microtubular	4.282166	peg	5.800027	chymase	3.926221	8-oxo-7	4.030879	mandible	3.624652	glycosyltransferase
	pigmentosum	3.736437	trim45	21.140856	mcu	4.677006	mitochondria	3.165201	unc5d	6.057977	serpina10	11.422371	ercc3	3.186533	rem1	6.526579	ovary	4.403748			meiosis-specific	4.943348			metaphase	2.266095	ssk2	2.958632	paraganglioma	3.528584	irx3	6.972047	taste	4.122959	unblocking	4.942334	il3	4.182492	manchette	4.468709	peptide-like	5.845803	basophils	4.070055	8-dihydroguani	4.154632	jaw	3.748239	n-linked
	endonuclease	3.772116	jade1	11.998597	ddb2	3.156907	overload	3.436230	lonp1	3.860268	wfdc5	5.415142	midzo	3.104873	mcu	5.941294	pirna	4.410686			premeiotic	5.232768			anaphase	2.363042	sho1	3.046483	lindau	3.699999	gprin3	6.947809	trachea	4.557080			cholirgic	3.695813	tracheal	5.156284	polyethyle	5.856501	tryptase	4.089608	oxidatively	4.259163	jaw	3.775943	oligosaccharide
	uv-induced	3.777456	ercc3	11.992326	tfiie	3.740282	respiration	3.546217	peg3	3.477901	mfng	5.118034	cytokisis	3.104899	prc1	4.729178	germli_stem	4.439746			iap	5.527946			kitochores	2.438239	phosphorelay	3.156310	hippel	3.710395	tmprss11b	5.561961	trachea	4.564652			thalamus	3.904270	ciliated	5.319623	dipeptide	5.861258	basophils	4.119455	g-quadruplex	4.495071	maxilla	3.849956	o-linked
	tfiih	3.784866	col25a1	8.035822	photosensitivity	4.582989	ca2	3.604440	trim45	3.137799	col25a1	3.230055	furrow	3.299741	lonp1	4.352864	oogesis	4.485348			mei2	6.204084			spindle	2.452432	mapkk	3.375305	bilateral	3.775719	nts	4.371753	brush	4.576358			ocortex	3.976910	head-tail	5.406198	proton-coupled	6.479822	basophil	4.390712	g-rich	4.760962	maxilla	3.855889	n-acetylglucosami
	incision	3.833465	serpina10	7.368990	brittle	4.586480	buffering	3.610897	sescence	3.705191	tenm1	3.161462	telophase	3.303112	shrec	2.921787	ovary	4.495597			stitch	7.351305			kitochores	2.455485	ypd1	3.500611	catecholami	3.823956	med30	3.923485	tuft	4.720923			ocortex	4.057909	preassembly	5.883718	oligopeptide	6.519829	trichilla	4.414526	nucleophile	5.124848	fibrous	4.141400	n-glycan
	single-stranded	3.925846	bub1b	6.891277	translocase	4.632178	opening	3.627939	p53	4.193111	cd40lg	3.110427	mitotic	3.539739	clrc	2.943111	plasm	4.648227							microtubules	2.464936	osmosensor	3.622506	adrenal_medulla	3.895326	il3	3.228619	umami	4.845484			bulb	4.258868	amorphous	6.165270	acetanilide	6.531056	spiralis	4.486675	tdg	6.013337	giant	4.181897	fucose
	irradiation	3.963383	ces1c	4.004022	preinitiation	4.853477	depolarization	3.671449	p53-dependent	4.274187	protease	3.932092	midbody	3.616570	subtelomeric	2.965665	localization-related	4.987887							prometaphase	2.483023	ssk22	3.769205	medulla	3.938679	imprinting	3.970769	urethra	4.864732			gamma-aminobutyric	4.609644	profilin	6.785656	oligopeptides	6.549751	mastocytosis	4.801568			giant	4.209035	n-acetylglucosaminyltransferase
	single-strand	3.970199	wfdc5	3.197198	bubble	5.067373	flux	3.672804	sescence-associated	4.308089	proteolytic	3.992940	segregation	3.617175	telomeres	3.160186	torso	5.030250							microtubules	2.488097	mating	3.867204	oplasia	3.960176	paternal	4.002134	urethra	4.870530			location	4.727829					scf-dependent	5.216471			mandibular	4.227114	carbohydrate
	transcription-coupled	4.004942	mcpt4	3.042274	desmosomes	5.370472	ros	3.703507	aging	5.043425	proteases	4.059453	abscission	3.645527	heterochromatin	3.323457	acetylating	5.051799							attachments	2.541510	phosphotransfer	4.451296	extra-adrenal	3.987490	hypermethylation	4.025320	sweet	5.240673			motor_cortex	4.788409					interleukin-33	5.391769			craniofacial	4.332101	mannosyl
	cockay	4.031296	ligase	3.842605	desmosomes	5.371379	permeability	3.812586	p53-independent	5.055309	zymogen	4.285997	plus-end	3.692185	heterochromatin	3.346822	moz	5.141288							kitochore	2.557740	a-factor	5.561066	hemangioblastoma	4.074327	demethylating	4.706381	papillae	5.673028			anatomical	4.799706					carboxypeptidase	5.688567			multilocular	4.413913	branch
	glycosylase	4.158365	ubiquitin	3.936280	pics	5.932115	entry	3.902852	puma	5.104493	proteolytically	4.480555	bundling	3.780270	rits	3.407722	acetylate	5.259891							mitosis	2.610482	l-gulonate	7.703627	chromaffin	4.111643	random	4.892711	circumvallate	6.191640			ionotropic	4.812981					basophilic	5.910568			disfigurement	4.640745	udp-n-acetylglucosami
	duplex	4.160140	proteolysis	4.138109			mitophagy	4.039742	progeroid	5.346339	pericellular	4.572997	centralspindlin	3.801440	shelterin	3.475411	hats	5.379871							microtubule	2.723954			urofibromatosis	4.113894			urethral	6.234932			muscarinic	4.827424									dentofacial	4.835646	aminoglycoside
	strands	4.179117	cullin	4.833882			contributes	4.047545	age-associated	5.589485	cell-cell	4.878141	kisin	3.816827	euchromatin	3.649957	acetyltransferase	5.550626							mad2	2.758682			chromaffin	4.128077			formyl	6.241449			nicotinic	5.008938									giant-cell	5.235451
	interstrand	4.189709	ddylation	4.925653			mitochondrial	4.114158	noxa	5.602635	branching	4.929034	astral	3.845446	euchromatin	3.661371	gonads	5.557808							checkpoint	2.915691			laparoscopic	4.280945			sour	6.629539			trin	5.065972									nonfamilial	5.280500
	helicases	4.218562	peptidase	5.105353			exchanger	4.158482			egf	5.173368	division	3.855461	mating-type	3.721548	gonads	5.572891							spindle_poles	2.918043			hypoxia-inducible	4.315631							subventricular	5.441277									multicystic	5.463447
	bases	4.337898	hook	5.138094			uncoupler	4.173985					lagging	3.926216	fission	3.766168	transposon	5.658607							spindles	2.930459			adrenalectomy	4.342182							trin-1	5.557127									noonan	5.633678
	gg-r	4.341720	scf	5.265751			dissipation	4.352412					chromatids	3.984238	telomere	3.790652	vasa	5.853429							spindles	2.942022			adrenal_glands	4.403613							gaba-a	5.679997									fibroma	6.473474
	ultraviolet	4.358098	elongin	5.278809			unfolded	4.391829					chromatids	4.004574	telomere	3.800362	morf	6.590830							poles	3.006480			hif	4.461352																	germ-li	7.471291
	tc-r	4.460410	amyloid	5.460616			pumping	4.490177					cytokitic	4.036252	set3	4.325243	phase-specific	7.215975							mad1	3.042632			angioma	4.543422																	hypofunction	7.650776
	unwinding	4.465738	hydrolysis	5.617800			cccp	4.555580					ingression	4.061741	clr6	4.334805									tension	3.089535			tachycardia	4.587997																	deoxyribonucleic	7.720377
	csb	4.529610	vcb	5.789687			evoked	4.579989					chromatid	4.250639	spreading	4.412176									centromeric	3.252654			hypoxia	4.720011
	ionizing	4.575224	proteinase	5.824845			oxidized	4.608564					kisins	4.322164											congression	3.270754			erythrocytosis	4.892117
	irradiated	4.650298	apolipoprotein	5.858310			swollen	4.644690					polo-like	4.4027											unattached	3.270992			polycythemia	5.069408
	uv-c	4.680415					misfolded	4.739085					catastrophe	4.581995											attached	3.299601			diaphoresis	5.083998
	crosslink	4.737611					atp-dependent	4.773891					polyploidy	4.736404											sac	3.300421			prolyl	5.293742
	dsdna	4.753555					orgallar	4.784588					streaks	4.977557											equator	3.390371			hydroxylation	5.421115
	cross-link	4.805060					p62	4.814459					heterotetrameric	5.255058											monopolar	3.400602			oxygen-dependent	5.526982
	uv-damage	5.048072					ptp	4.823718					poly-a	5.809343											centrosomes	3.456020			urosecretory	5.933004
	dna-protein	5.123368					mpt	5.026625																	dyin	3.628490			urosecretory	5.936285
	incised	5.128668					trisphosphate	5.355332																	anaphase-promoting	3.802648			medulla_oblongata	6.015473
	apurinic	5.163764					parkin-mediated	5.424290																	securin	3.823704			oblongata	6.044237
	apyrimidinic	5.196400																							dynactin	3.843529
	radiation-induced	5.236065																							apc	3.956240
	uv-sensitive	5.372110																							nucleation	4.113157
	epidermal	5.796908																							mcc	4.271690
	rays	6.271804																							nucleate	4.363628
	catenin	7.057908																							uninhibited	4.543162
																									crna	5.025061
[truncated: 17 more columns]

## Sheet: Suppl. Table 2.2
Supplementary Table 2.2 Compbio outputs based on the downregulated DEGs from microarray on NP tissues; DQ vs. Control
Theme	MAD1 complex		Polo-like kinase 3 (PLK3) pathway		CDKN1A (p21) prevents phosphorylation of Cdh1 by Cyclin A:Cdk2		TAK-mediated JNK (c-Jun kinases) phosphorylation/activation		Activated TAK1 mediates Jun kinases (JNK) phosphorylation and activation		Phosphorylation of DSIF by the P-TEFb(Cyclin T1:Cdk9) complex		Sequence-specific double-stranded DNA binding		Clathrin coat of endocytic vesicle		26S proteasome degrades TP73 polyubiquitinated by ITCH		Golgi Cisternae Pericentriolar Stack Reorganization		Suppression by virus of host ATP-dependent RNA helicase activity		Negative regulation of transcription of homeotic ge (Polycomb group)		Nuclear mRNA surveillance of mRNP export		Tristetraprolin (TTP, ZFP36) binds and destabilizes mRNA		Peroxisomal importomer complex		TBC RabGAPs accelerate GTP hydrolysis by RAB35		Entrainment of circadian clock by photoperiod		Retinitis pigmentosa		MYLK (MLCK) phosphorylates MRLCs of the non-muscle myosin II complex		Extramedullary Hematopoiesis (disorder)		Lysophosphatidic acid acyltransferase activity		Nucleoside monophosphate kinase activity		Trypanosoma brucei brucei		Medium-chain acyl-CoA hydrolase activity		Heparanase 2 (HPSE2) cleaves heparan sulfate from its proteoglycan (plasma membra)
Thematic Enrichment Score	22437.4		22244.1		22017		21716.7		16609.4		15588.5		13106.2		29047.2		28317.8		18951.9		47834.9		23999.3		19530.2		18506		28165.4		23624.2		23097.3		22099.4		21312.7		19463.3		19254.6		18140.5		17461.5		17328		16248.2
Coordinates in 3-D Space	X: 33.02,Y: 27.77,Z: 2.47		X: 33.40,Y: 28.33,Z: -6.54		X: 31.68,Y: 5.51,Z: 5.53		X: 39.77,Y: 7.70,Z: -3.39		X: 28.48,Y: 4.92,Z: 4.15		X: 31.99,Y: 25.66,Z: 10.98		X: 34.32,Y: 18.28,Z: 3.05		X: 29.01,Y: 13.92,Z: 22.11		X: 35.75,Y: 19.18,Z: 12.49		X: 20.38,Y: 14.68,Z: 33.95		X: 21.96,Y: 32.68,Z: 11.99		X: 21.71,Y: 34.10,Z: 4.98		X: 19.50,Y: 36.31,Z: 15.36		X:-21.69,Y: 20.88,Z:-28.48		X: 35.91,Y: 5.43,Z:-22.37		X: 25.83,Y: 11.71,Z: 32.38		X: 19.70,Y:-31.95,Z: 9.89		X: 11.35,Y:-19.57,Z:-33.01		X: 30.72,Y: 5.92,Z: 13.80		X: -6.67,Y:-32.00,Z:-18.32		X: 38.00,Y: 0.96,Z:-16.42		X: 15.22,Y: 18.21,Z:-30.75		X: 25.77,Y: 20.76,Z:-25.47		X: 33.33,Y: -2.89,Z:-27.18		X: 36.91,Y: -5.80,Z: 23.72
Entity Total	24		10		44		24		50		24		27		23		21		10		19		15		8		13		12		9		9		5		21		16		14		6		7		9		9
Concept Total	4		3		37		10		40		16		13		21		15		20		24		5		6		6		14		6		39		8		39		37		19		16		18		18		9
P-Value	0.13		0.086		0.036		0.026		0.008		0.006		0.003		0.427		0.266		0.011		0.103		0.27		0.038		0.009		0.144		0.206		0.158		0.054		0.016		0.024		0.016		0.007		0.01		0.008		0.006
NEScore	1.266		1.316		1.425		1.465		1.574		1.613		1.685		1.028		1.134		1.532		1.373		1.133		1.422		1.547		1.236		1.191		1.234		1.37		1.494		1.468		1.505		1.566		1.555		1.593		1.587
Entity (gene)	Entity/Concept	Enrichment Score	Entity/Concept	Enrichment Score	Entity/Concept	Enrichment Score	Entity/Concept	Enrichment Score	Entity/Concept	Enrichment Score	Entity/Concept	Enrichment Score	Entity/Concept	Enrichment Score	Entity/Concept	Enrichment Score	Entity/Concept	Enrichment Score	Entity/Concept	Enrichment Score	Entity/Concept	Enrichment Score	Entity/Concept	Enrichment Score	Entity/Concept	Enrichment Score	Entity/Concept	Enrichment Score	Entity/Concept	Enrichment Score	Entity/Concept	Enrichment Score	Entity/Concept	Enrichment Score	Entity/Concept	Enrichment Score	Entity/Concept	Enrichment Score	Entity/Concept	Enrichment Score	Entity/Concept	Enrichment Score	Entity/Concept	Enrichment Score	Entity/Concept	Enrichment Score	Entity/Concept	Enrichment Score	Entity/Concept
Concept	cdc16	849.787417	plk3	3145.402750	cdkn1a	251.040350	map2k4	658.501806	pde4a	60.481703	taf7	489.076739	slc20a1	245.236827	exoc2	504.735130	wwp2	457.115414	arfgap1	955.426974	dhx8	1277.615594	jarid2	1264.903698	ddx19b	2043.567386	zfp36l1	1640.559879	pex13	1484.739025	tbc1d14	1306.431754	nr1d1	429.103146	rpgr	2426.635560	fmnl2	345.445978	asxl1	616.238951	gpam	542.559759	pnp	1228.636971	tut1	996.278423	etfdh	1093.324863	ndst1
Cell Cycle Regulation	mnt	779.184531	cdc16	12.934660	mdm2	105.181572	map3k5	475.348844	atf4	37.657497	polr3d	73.806241	hmgb2	146.663569	vps37b	216.354263	psme4	387.422464	trim47	113.859835	sf3a1	407.250261	asxl1	807.891211	stau2	104.878384	stau2	24.748703	nrf1	202.180629	cdc16	1160.841965	clock	425.343	mnt	201.179739	mylk	215.245977	samd9l	109.244414	gpat4	410.884753	adsl	221.024768	csgalnact2	180.885238	adsl	38.044452	tut1
RNA Regulation	ing2	205.950064	cdkn1a	12.814663	uimc1	27.501448	junb	71.980572	hbegf	35.260725	med24	47.234785	mnt	66.100279	arfgap1	194.295633	uimc1	251.105448	trim41	53.067548	ddx19b	255.053544	sertad1	91.759235	psme4	17.296955	map3k5	15.699307	tut1	180.405623	tfe3	18.298860	kif20b	220.030722	tut1	39.160554	olfr73	74.892644	nras	63.279337	tmem150a	84.707259	nt5c3	75.531180	pex13	115.950236	gpam	25.499343	hbegf
Protein Regulation	tut1	48.557912	ctdsp1	9.496686	sertad1	23.217989	akt1	20.123672	mnt	28.030444	ctdsp1	45.002971	mdm2	32.109687	lbh	140.211380	trim41	93.877305	tbc1d14	48.312819	ythdf1	125.254562	chd9	78.808427	tspan2	14.493680	mdm2	8.930009	med24	14.747186	exoc2	16.859218	nfil3	190.838853	ets2	22.210546	rock2	59.538776	cd44	21.187063	tut1	19.682069	tut1	32.359909	slc35a5	61.034016	dock8	21.775609	csgalnact2
Unassigned	tgif1	39.552311	akt1	7.017689	akt1	22.398272	atf3	19.190880	map2k4	27.797726	ppp1r14b	22.004131	rel	27.520114	ldlrap1	137.638172	mdm2	88.229304	csgalnact2	28.959145	stau2	78.067704	ing2	14.173116	cdkn1a	4.041767	pim1	7.026097	zfp423	13.879251	atf4	13.264343	mnt	20.252935	adsl	7.787277	ptk2	54.793743	cd68	18.284780	mylk	13.993257	pde4a	20.013825	pnp	7.180471	nrf1	17.862244	cd44
	exoc2	25.028662	rock2	6.956954	plk3	20.160966	cdkn1a	13.558748	atf3	26.371970	dhx8	21.534659	junb	22.241552	arrdc2	55.596054	irak4	88.165477	gpat4	21.948493	tut1	73.739417	phf14	12.686468	ptk2	3.614189	cdkn1a	5.500668	isoc1	12.926078	etfdh	5.011542	tfe3	6.918782	retinitis	4.689026	tjp1	39.205411	ermap	15.537327	gpr35	12.144316	adm	3.311108	ndst1	5.836971	gpat4	15.254268	tjp1
	ptk2	18.074438	casp8ap2	6.552969	plaur	19.739280	atf4	11.881931	map3k5	26.281904	junb	18.811571	hbegf	21.580793	ermap	31.807961	map3k5	29.068343	slc35a5	9.280967	psme4	45.062651	zfp423	10.101212	pex13	3.575419	junb	4.975239	gpam	11.509119	rel	4.754787	gpam	6.464144	pigmentosa	4.746380	ctdsp1	19.878491	sf3a1	11.614535	sertad1	10.147588	nucleoside	4.095863	top2b	3.030118	ndufaf6	7.366119	tgfbi
	taf7	14.003473	mdm2	5.167384	trp53inp1	19.316096	trp53inp1	7.967963	nfil3	20.675907	ddx19b	11.470491	top2b	19.303494	wwp2	22.414005	map2k4	27.594657	stab2	6.522671	zfp36l1	40.963200	cdkn1a	7.352608	srrt	3.152705	atf3	4.956315	ifrd1	10.336189	fmnl2	4.064205	junb	4.347481	stargardt	5.512707	arhgap32	16.684944	plaur	8.645503	arfgap1	8.412063	phosphorylase	4.254664	uridylation	5.397174	pex13	4.962399	mylk
	plk3	12.252864	cdr2	4.999276	ing2	18.985985	nras	7.431117	mafk	15.717376	mylk	10.617527	cdkn1a	14.317393	tbc1d14	18.637218	trim47	26.671407	map6	5.802439	chd9	16.441341	srrt	6.712754	mrnp	4.630204	ier2	4.398792	etfdh	6.377700	trp53inp1	3.676882	best3	3.176651	puri-rich	5.988978	adsl	9.750154	tfe3	8.462918	rock2	7.949413	amp	4.446014	trypanosoma	5.522591	irak4	3.864062	timp1
	uimc1	10.237395	zfp36l1	3.655147	map3k5	16.212722	slc20a1	7.143128	akt1	15.669906	top2b	10.153537	ets2	12.037670	mdm2	17.501169	wsb1	21.380680	lysmd3	4.073488	asxl1	15.816446	plk3	5.955046	nuclear_pore	4.709777	plaur	4.315705	lbh	3.861691	trappiii	4.291415	circadian	4.413555	choroideremia	5.990660	map6	8.001384	cdkn1a	7.139813	akt1	7.711488	nucleosides	4.618391	brucei	5.543445	flavoprotein	3.893900	heparan
	tjp1	10.114318			atf4	16.026480	irak4	6.464715	junb	15.030738	zfp36l1	8.857472	mafk	10.462856	ackr3	12.297270	nrf1	17.958156	coat	4.260769	sertad1	11.880022	slc20a1	5.498627	ip6	5.258893	akt1	3.608325	gpat4	3.739353	rabgaps	4.716400	rhythm	4.427158	vesical	6.892014	efna1	7.598380	pim1	6.894499	hbegf	6.872985	salvage	4.656403	utp	5.798855	acylcarniti	4.179526	n-deacetylase
	cdkn1a	9.559179			nras	13.469351	hbegf	5.778269	cdkn1a	12.132876	mdm2	7.841125	nrf1	10.097785	cdc16	10.655	rel	17.108344	copi	4.441407	srrt	6.553504	plagl1	4.585507	hexakisphosphate	5.328703	timp1	3.429214	akt1	3.489550	tbc	4.880649	night	4.552680	checkup	7.437379	dock8	6.023053	dock8	5.682130	ldlrap1	6.203129	deaminase	4.921947	distributive	5.837415	acyl-coa	4.352813	n-sulfotransferase
	llgl2	7.313695			atf3	13.127082	egr2	5.322578	nrf1	11.159288	akt1	6.826018	sertad1	9.942431	eeig1	8.162664	zfand1	16.205674	copi-dependent	4.474837	hmgb2	5.963248	hmgb2	4.322186	hexaphosphate	6.224850	plk3	3.232725	peroxisomes	4.091906	trapp	4.910472	sleep	4.624659	dmnt	8.451794	rtkn	5.693858	mdm2	4.235728	zfp423	5.825149	lyase	5.082868	uridylylation	6.054323	carniti	4.395492	proteoglycans
	mdm2	7.072699			top2b	13.052094	plk3	4.808904	slc20a1	9.384668	atf4	6.161250	psme4	9.660005	gpr35	7.420237	egln3	14.561668	cisternae	4.501541	thumpd1	5.668966	atf3	3.203767	mrna-containing	6.819025	au-rich	4.857682	peroxisomes	4.101648	lipidation	4.983755	nocturnal	4.728634			cd44	5.449313	ackr3	4.047071	ptk2	3.222657	monophosphate	5.145237	uridyl	6.398380	fad	4.499314	glycocalyx
	wwp2	6.795939			hmgb2	12.468667	mylk	4.624655	tfe3	8.618659	wwp2	6.018865	s100a2	7.720112	tjp1	6.743636	top2b	10.909983	coatomer	4.527798	top2b	4.551918	mdm2	3.094905			tristetraprolin	5.011614	peroxisomal	4.155098	starvation	5.607659	rhythmic	4.862917			plaur	5.059813	junb	3.471698	diacylglycerol	3.959808	imp	5.200077	editosome	6.572617	electrons	4.662747	glycocalyx
	rpgr	5.497338			casp8ap2	10.970778	plaur	4.060831	mdm2	8.585954	tjp1	4.622229	atf3	7.001285	litaf	6.511333	atf4	10.724758	golgi_apparatus	4.568111	cdkal1	3.723152	polycomb	3.792913			ttp	5.047468	peroxisome	4.414799			suprachiasmatic	5.035080			tfe3	4.490021	jarid2	3.384548	dag	4.367793	phosphoribosyltransferase	5.333733	trypanosomiasis	6.815684	flavin	4.795258	heparanase
	irak4	5.404401			map2k4	9.828954	ptk2	3.998888	ackr3	8.375167	ifrd1	4.561247	atf4	6.818147	plaur	6.287584	cdkn1a	10.526232	curvature	5.181290	uimc1	3.297889	prc2	4.403339			auf1	5.359665	thiolase	4.752958			pacemaker	5.078153			akt1	4.280928	myeloproliferative	3.944430	triacylglycerol	4.410620	fumarate	5.560223	kitoplast	6.817570	ubiquino	4.974950	paps
	map3k5	4.693876			pim1	9.813197	nrf1	3.584598	plaur	8.293660	map6	4.238728	nfil3	6.438864	cdkn1a	4.820429	akt1	6.365154	cisternal	5.250195	rpgr	3.269457	homeotic	4.743620			mapk-mediated	6.968415	pexophagy	5.590176			suprachiasmatic_nucleus	5.154909			exoc2	4.246611	hematologic	3.978514	acyltransferase	4.419350	riboside	5.765059	nucleotidyltransferase	7.213700	medium-chain	4.989774	mitosome
	akt1	4.393671			junb	8.829545	timp1	3.544466	rock2	7.384459	plk3	3.902274	tfe3	6.229772	pex13	4.437438	cdc16	4.718750	copi-coated	5.293381	sbno2	3.180600	pr-dub	4.853365			autodegradation	8.057223	zellweger	5.705332			entrainment	5.196211			rpgr	4.190295	hematopoiesis	4.017503	phosphatidic	4.506019	nucleotidase	5.933965	udp-sugar	7.471217	glutaric	5.021422
	plaur	3.880742			cd44	8.388870	tjp1	3.516422	egr2	7.306651	ptk2	3.863312	srrt	5.960648	cd44	3.746491	junb	4.082561	alps	5.427997	pre-mrna	4.012740	brahma	5.393069					proliferator-activated	5.948214			clock	5.203407			csgalnact2	3.792927	myelodysplastic	4.077139	phospholipase	4.559620	exonuclease	6.135429	papa	7.530340	dehydrogenation	5.193335
	atf3	3.677420			arhgap32	8.050585	pim1	3.447244	mylk	7.202798	zfand1	3.842498	hivep1	5.283143	dhx8	3.637593	pex13	3.731371	golgi-to-er	5.515103	spliceosome	4.128675							importomer	6.050532			cry	5.212094			arfgap1	3.763360	hematopoietic_stem	4.226024	lysophosphatidic	4.681109	polynucleotide	6.462882	aua	7.552347	acidemia	5.254879
	med24	3.404070			cdc16	7.617552	ets2	3.261768	adm	7.198345	fmnl2	3.802893	egr2	5.065189	efna1	3.626736	proteasomal	3.724793	copi-independent	5.522892	helicase	4.214058							polymorpha	6.117264			oscillation	5.279757			f-actin	3.511324	blasts	4.235727	glycerolipid	4.857659	degradosome	6.749616	tetrasaccharide	7.598242	aciduria	5.421637
	top2b	3.319807			mylk	7.613317	mdm2	3.138587	nr1d1	7.051811	cdkn1a	3.557660	arhgap32	4.205847	srrt	3.120437	polyubiquitin	3.877682	stack	5.576008	pre-mrnas	4.343339							coactivator	6.351501			awakening	5.361010			actin_cytoskeleton	3.568819	myelomonocytic	4.258314	phosphatidate	5.061823			glycosome	7.768201	inborn	5.463669
	psme4	3.116807			psme4	7.492089	rel	3.113419	cd68	7.016710	pim1	3.437308	phf14	4.150086	endocytic	3.557616	ligases	3.891887	uncoating	5.688758	spliceosomes	4.378404							uridylyltransferase	6.950874			arrhythmic	5.576153			polymerization	3.659834	myelofibrosis	4.517156	esterification	5.118711			n-acetylgalactosaminyltransferase	7.837173	fadh2	5.487082
	mad1	5.493458			timp1	6.733092	mapkk	4.447031	lbh	6.696587	pausing	4.164412	wwp2	3.824431	recycling	3.796826	proteasome	3.908396	tubulation	5.824492	spliceosomes	4.399876							lactoylglutathio	7.817438			pial_gland	5.589247			adhesions	3.890216	cmml	4.544642	o-acyltransferase	5.124032			uncleaved	8.223570	mcad	5.876081
	sin3	5.497518			ptk2	6.609313	mitogen-activated	4.689858	cd44	6.550438	preinitiation	4.262280	akt1	3.066447	clathrin	3.897061	polyubiquitinated	3.955247	pinocytosis	7.070139	helicases	4.433477							pgc-1alpha	7.931504			oscillatory	5.623729			actomyosin	3.930185	oplasm	4.561517	acylation	5.243988					lcad	6.268961
	anaphase-promoting	5.525581			s100a2	6.450206	stress-activated	4.905302	timp1	6.524202	tfiid	4.386078	egln3	3.016847	budding	4.400890	k63-linked	4.371674	endoplasmic_reticulum_rough	7.152602	rna-binding	4.450550											rev-erba	5.714999			focal_adhesions	3.954642	count	4.568352	1-acylglycerol-3-phosphate	5.250384					antimycin	6.523815
	multiprotein	5.763805			ets2	6.380711	hog1	4.979589	gpam	6.298758	p-tefb	4.495131	mobility	4.206481	internalization	4.419557	26s	4.561320	tripartite	7.208069	spliceosomal	4.502421											apa	5.916474			myosin	4.036083	leukocytosis	4.779326	pkc	5.815286
					rock2	5.939382	mapkkk	4.980357	phf14	6.208308	ctd	4.502553	transactivation	4.588755	clathrin-dependent	4.495272	proteasome-mediated	4.603214	endocytotic	7.421679	snrnp	4.570699											e-box	5.988766			rho	4.060429	extramedullary	4.819678	4-kinase	6.185046
					hbegf	5.766008	pbs2	5.501867	plk3	6.166638	tfiih	4.586738	sequence-specific	4.658378	multivesicular	4.538286	autoubiquitination	4.886923	cistern	7.702058	unwinding	4.709269											rev-erb	6.011120			protrusion	4.079144	cytopenia	4.831139	trisphosphate	6.583954
					clock	5.511147	c-jun	5.588907	tjp1	5.926251	dsif	4.615177	protein-dna	4.920501	clathrin-coated_vesicles	4.645940	monoubiquitination	4.918191			h-box	4.863422											ultradian	6.224764			vinculin	4.153006	thrombocythemia	4.842218	lpl	6.626952
					ackr3	4.750602	map2k	5.690028	irak4	5.507579	pause	4.733703	dna-protein	5.326349	pits	4.702517	hect	5.109670			rna-dependent	4.902055											phase-shift	6.391503			arp2	4.229927	polycythemia	4.976951	overfeeding	6.855505
					nrf1	4.418971	erk5	5.859408	pim1	5.477183	pre-initiation	4.856411	transactivating	5.542642	post-golgi	4.786961	ubiquitin-independent	5.407302			atp-dependent	4.951645											ror	6.461238			tension	4.238867	vera	5.017155	5-kinase	6.962000
					fmnl2	4.303847	cdk-mediated	7.416609	tgif1	5.462613	tfiia	4.962677	hmg	5.637421	exocytic	4.811233	tak1	5.651211			lariat	5.123916											desaturation	6.686155			bundling	4.289204	myelodysplasia	5.029642
					tfe3	4.177225			ets2	5.324834	lf	5.575517	trans-activation	5.831500	multivesicular_bodies	4.891585	ikks	6.022331			double-stranded	5.310008											hypopa	7.034290			cytochalasin	4.302798	monocytosis	5.060189
					zfp36l1	4.157390			psme4	5.188646	destabilization	5.627721	pou	5.921744	secretory_vesicles	4.908389	ikba	6.109824			transesterification	5.479463											dex	7.048338			disruption	4.395895	sideroblasts	5.075122
					tjp1	4.060503			efna1	4.927211	disassembly	5.887494	spacing	5.933405	bud	5.035320					atp-independent	5.550128											arousals	7.095725			adherens_junctions	4.464097	multiliage	5.081481
					efna1	4.045319			ptk2	4.905073	tfiiib	5.939568	tetramerization	5.998769	escrt	5.065577					u2af	5.737094											swallowing	7.153251			actin-based	4.483189	myelogenous	5.281333
					cdkal1	3.987898			rel	4.846155	phosphorylation-dependent	5.971858	grooves	6.180850	membra-associated	5.106216					4-thiouridi	5.821684											supi	7.175399			traction	4.592480	blastic	5.403296
					plagl1	3.617398			clock	4.543708	holoenzyme	5.977854	mithramycin	7.414008	exocyst	5.129724					mrna-binding	6.470639											non-24-hour	7.237240			formin	4.628914	multipotent	5.404755
					cd68	3.326928			jarid2	4.503970					ap-2	5.250972					writer	6.703401											snoring	7.256841			lamellipodium	4.734447	transfusion	5.443434
					rel	3.074177			gpr35	4.083688					adp-ribosylation	5.315188					rna-specific	7.382259											hibernation	7.271605			formins	4.849520	crisis	5.628577
					mnt	3.067419			zfp36l1	3.981194					arf	5.457566					steryl	8.558257											trouble	7.395262			actin-dependent	4.936265	mastocytosis	5.819516
					egln3	3.046619			top2b	3.973872					arrestin	6.215701																	hypoxemia	7.409447			deformation	5.000270	indeterminate	5.854005
					arrest	2.643294			zfp423	3.890801																							delirious	7.851800			actin-myosin	5.042701	aplastic	5.893141
					p53	2.663442			wwp2	3.887403																							dysphagia	7.929355			trailing	5.159203	u937	6.010748
					suppressor	2.736885			egln3	3.669740																							swallow	7.959131			circumferential	5.177022	u937	6.019997
					p21	2.761784			uimc1	3.234442																							swallowed	8.274864			microfilament	5.193585	monoblastic	6.056185
					cyclin	2.931545			tgfbi	3.061722																											living	5.235558	raeb	6.138808
					p53-dependent	3.026693			casp8ap2	3.007999																											rounding	5.311187	multipotent_stem	6.315176
					cyclin-dependent	3.045259			mediate	2.748942																											polymerizing	5.336028	passages	6.851526
					mediates	3.170043			suppression	2.771590																											immobile	5.427147	abl-positive	7.872763
					blocked	3.173446			interacts	2.871655																											calmodulin	5.431835	jelly	8.003452
					sescence	3.259751			kinases	2.885883																											deformed	5.694177
					cdk	3.385678			apparent	2.906440																											invadopodia	5.754839
					p27	3.393720			modulating	2.919000																											cable	5.812372
					activator	3.395607			explanation	2.987298																											fluor	5.917173
					p53-independent	3.395784			modulates	3.139597																											fimbrin	6.152332
					bcl-2	3.407174			sirna	3.150493																											caldesmon	6.261637
					cycle	3.447138			pool	3.266835																											gizzard	7.033779
					s-phase	3.455121			reasons	3.349563
					anti-apoptotic	3.456686			environmental	3.372192
					pro-apoptotic	3.474153			interfering	3.420421
					irradiation	3.531173			activators	3.570547
					ionizing	3.541983			jnk	3.605915
					double-strand	3.648619			repressor	3.622828
					metastatic	3.651817			autocri	3.685417
					invasive	3.656205			represses	3.763668
					melanoma	3.718373			quiescent	3.806032
					sescence-associated	3.749749			camp	3.859745
					chk2	3.947670			stress-induced	3.879858
					radiation-induced	3.977490			egf	3.885948
					phosphorylation	3.990974			creb	3.909036
					render	4.088193			mammary	3.914367
					implanted	4.102374			sequestering	4.147496
					blockage	4.212299			uron	4.177779
					sasp	4.425879			pdgf	4.211879
					treatment-induced	4.676899			secreting	4.240566
					d1-cdk4	4.848979			platelet-derived	4.261273
					sahf	5.073585			plethora	4.337318
					postirradiation	5.540822			zipper	4.341964
									element-binding	4.384585
									ebp	4.386801
									dimethyl	4.594367
									forskolin	4.618011
									phosphodiesterase	4.665317
									palpable	4.679627
									mammary_glands	4.816713
									tam	4.817794
									nontoxic	4.908773
[truncated: 17 more columns]

## Sheet: Suppl. Table 2.3
Supplementary Table 2.3 Compbio outputs based on the upregulated DEGs from microarray on AF tissues; DQ vs. Control
Theme	Hedgehog signaling events mediated by Gli proteins		Delta1 complex		GLI proteins bind promoters of Hh responsive genes to promote transcription		Olfactory bulb mitral cell layer		Kinetotochore adaptor activity		Loss of function of TP53 in cancer due to loss of tetramerization ability		Dbf4-dependent protein kinase complex		DAP12 interactions		Internalization of MHC II:Ii clathrin coated vesicle		Granulocyte macrophage colony-stimulating factor receptor activity		Palmitoylation of eNOS		Cancer		Serpins/Protease Regulation		Dehydrodolichyl diphosphate synthase activity		(-) regulation of receptor-mediated endocytosis of low-density lipoprotein particle involved in cholesterol transport		FCGR activation		Endopeptidase Clp activity		Monocyte chemotactic protein-1 (MCP-1) production		Sialyltransferase I can add sialic acid to the T antigen at the alpha 6 position		SWI/SNF complex		90S preribosome assembly		Increased nuchal translucency		Treacher Collins syndrome		Alpha-methylacyl-CoA racemase activity		Inositol-1,4,5-trisphosphate 5-phosphatase activity
Thematic Enrichment Score	27456.1		13765.8		9017.74		8639.07		15049.1		13508.2		10810.4		34306		21291.4		17577.2		13569.6		10662		10456.2		9151.18		9083.03		8781.89		8657.83		8223.16		19110.7		17954		16661.5		16365.8		15905.2		13353.7		13176.2
Coordinates in 3-D Space	X: 22.19,Y: 9.24,Z:-35.93		X: 29.53,Y: -4.11,Z:-30.94		X: -4.70,Y: -0.20,Z:-43.41		X: 10.93,Y: 12.24,Z:-33.12		X:-26.43,Y: -9.81,Z:-30.99		X:-34.76,Y: -7.34,Z:-15.35		X:-24.05,Y: -9.35,Z:-37.87		X: 20.71,Y:-23.69,Z: -9.76		X:-10.19,Y:-28.16,Z:-25.24		X: 12.79,Y:-14.48,Z:-29.03		X:-16.65,Y:-36.11,Z:-19.10		X: 24.63,Y:-15.09,Z:-31.15		X: 17.28,Y:-23.81,Z:-27.08		X:-23.59,Y: 19.30,Z: 20.21		X: 1.64,Y:-21.71,Z:-27.96		X: -9.81,Y:-24.70,Z:-34.35		X: 8.68,Y:-19.04,Z:-39.65		X: 10.08,Y:-13.81,Z:-29.08		X: -1.78,Y: 25.80,Z: 14.12		X:-25.58,Y: 17.81,Z:-31.99		X:-21.40,Y: 15.11,Z: 33.66		X:-10.55,Y: 36.45,Z: 13.34		X: 5.06,Y: 37.51,Z: -8.40		X: 31.03,Y: -2.05,Z: 22.75		X: 13.36,Y:-40.12,Z: 2.51
Entity Total	9		11		19		9		11		6		8		14		8		25		9		14		15		5		21		7		10		33		17		9		8		5		6		5		9
Concept Total	16		3		6		16		12		5		7		7		26		39		7		6		14		10		28		3		7		37		17		12		20		30		39		14		12
P-Value	0.406		0.52		0.413		0.283		0.466		0.432		0.46		0.359		0.606		0.541		0.484		0.437		0.416		0.472		0.442		0.37		0.316		0.317		0.627		0.612		0.535		0.484		0.455		0.396		0.361
NEScore	1.044		0.968		1.056		1.162		1.013		1.031		1.02		1.06		0.916		0.956		0.995		1.04		1.054		1.01		1.033		1.089		1.135		1.137		0.903		0.915		0.962		0.999		1.02		1.059		1.084
Entity (gene)	Entity/Concept	Enrichment Score	Entity/Concept	Enrichment Score	Entity/Concept	Enrichment Score	Entity/Concept	Enrichment Score	Entity/Concept	Enrichment Score	Entity/Concept	Enrichment Score	Entity/Concept	Enrichment Score	Entity/Concept	Enrichment Score	Entity/Concept	Enrichment Score	Entity/Concept	Enrichment Score	Entity/Concept	Enrichment Score	Entity/Concept	Enrichment Score	Entity/Concept	Enrichment Score	Entity/Concept	Enrichment Score	Entity/Concept	Enrichment Score	Entity/Concept	Enrichment Score	Entity/Concept	Enrichment Score	Entity/Concept	Enrichment Score	Entity/Concept	Enrichment Score	Entity/Concept	Enrichment Score	Entity/Concept	Enrichment Score	Entity/Concept	Enrichment Score	Entity/Concept	Enrichment Score	Entity/Concept	Enrichment Score	Entity/Concept
Concept	smo	1745.378654	jag1	1843.868079	e2f2	461.173845	olfr17	199.765739	cenpo	810.193314	kctd5	1149.072664	cdc7	1083.029803	tyrobp	1983.682847	dnm3	1004.641458	csf3r	157.930136	abhd17a	971.770680	fap	847.079124	fap	246.851059	nus1	952.380434	dnm3	213.979759	fcgr3	1357.592072	s100a8	766.982366	ngp	46.828492	mgat2	475.094142	pbrm1	885.195623	utp14a	343.425978	pappa	1254.192126	tcof1	1015.003321	amacr	1237.292960	inpp5d
Development	tcof1	123.204428	dennd1a	21.937594	wtap	71.181662	lcn4	186.241727	cdc7	127.680969	kctd7	666.440902	stmn1	22.040467	ptpn6	445.625325	ap2a1	265.437477	cybb	152.708026	nus1	233.675870	pdzk1ip1	27.212402	pappa	113.811507	lcp1	30.241546	cybb	27.046916	ptpn6	30.436825	wfdc21	11.695181	tyrobp	26.249962	st6galnac3	223.429599	ino80b	327.179410	wdr46	271.664470	adipoq	7.258170	lonp1	26.288612	nudt7	66.286832	mgat2
Cell Cycle Regulation	irx3	67.242306	smo	13.316735	mark4	70.333869	obp1b	141.808984	dnm3	64.967509	mrs2	24.469717	e2f2	7.719473	trem3	251.740737	dennd1a	97.665414	ngp	103.938348	vsnl1	73.791557	msr1	17.498880	lonp1	75.313868	mpeg1	29.777074	inpp5d	26.694613	inpp5d	26.320220	cybb	11.305986	aif1	18.237174	st8sia3	155.825636	trim30a	74.788942	ftsj1	209.372250	dennd1a	6.942554	jag1	8.899717	mecr	12.039450	ptpn6
Immune Modulation	slitrk6	34.378722	lgr6	9.551965	spi1	20.493215	olfr1295	43.321699	stmn1	47.641998	dnm3	9.505466	dennd1a	7.690999	fcgr3	100.985345	bend5	14.118207	s100a8	38.907866	pdzk1ip1	47.339907	amacr	16.720913	serpina1b	59.614365	mgat2	5.950411	tyrobp	24.589550	tyrobp	24.298055	msr1	10.482460	selp	17.996362	chil3	86.375097	amacr	44.398628	tcof1	125.154223	amacr	6.134241	fam136a	6.843130	adipoq	3.403356	gdpd2
Unassigned	fap	17.909924	mdk	6.856918	peg10	13.147638	olfr1325	41.374190	dnttip1	30.304374	dnttip1	6.411698	ptpn6	6.735854	inpp5d	90.536330	mbnl3	13.550409	spi1	34.856858	mpeg1	13.685713	mdk	15.350909	serpinb3a	53.034114	csf3r	4.986307	ap2a1	19.991150	s100a8	9.445241	aif1	7.980578	s100a8	14.970559	car1	38.618322	dnttip1	41.603689	rps26	112.623418	peg10	3.408759	slitrk6	4.278265	msr1	3.238420	car1
	mmrn2	12.258285	sfrp4	6.324875	lgr6	12.664761	aif1	11.826627	wdr46	14.182696	s100a8	5.521586	pbrm1	3.226478	aif1	7.713267	nus1	8.233151	mpeg1	23.601139	aifm2	8.632178	pbrm1	7.751834	lum	41.720993	isopre	3.780830	fcgr3	13.787678	msr1	8.479532	chil3	6.608936	cybb	12.043382	nus1	30.246554	lonp1	41.318588	nudt7	54.930614	trimester	3.238849	rps26	3.253053	racemase	3.727257	dnm3
	jag1	8.388686	bend5	3.966257	dnttip1	11.968311	slitrk6	5.169986	cluh	12.831133	tetramerization	5.326476	serpina1b	3.181934	csf3r	7.579740	mecr	4.935717	ms4a3	22.832193	dnm3	5.313052	jag1	7.153873	spink7	33.431310	cis-1	4.549518	ptpn6	13.516580	cybb	7.076617	adipoq	6.353782	chil3	11.996987	tyrobp	13.438500	cenpo	39.206100	cluh	50.689800	pregnancies	3.267380	treacher	3.460032	prostatic	3.932272	csf3r
	aif1	8.341404	irx3	3.706172	cdc7	11.954575	jag1	3.396176	smo	10.551972	cul3-ring	6.277976	depdc7	3.138281	msr1	7.405141	cybb	4.004416	lcp1	19.963662	cybb	4.099967	smo	6.734954	mgat2	11.215140	dolichol	4.608569	msr1	10.856162			lonp1	5.200391	msr1	11.876637	trem3	12.920229	smo	3.738509	zik1	28.799535	chorionic	3.353669	palpebral	3.466451	alpha-methylacyl-coa	4.173741	ednrb
	olfr17	4.963679	ap2a1	3.589983	ftsj1	11.335621	s100a8	3.337536	lonp1	6.347497	tetramer	6.310348	dbf4-dependent	4.767693	mpeg1	6.895390	clathrin-mediated	3.260746	tyrobp	16.472820	smo	3.309075	lum	6.470243	s100a8	7.075095	rubber	4.729118	aif1	9.970801			gdpd2	4.403289	ptpn6	10.502455	msr1	11.096137	spi1	3.128540	pre-rrna	4.344813	gestational	3.495128	collins	3.572989	prostatectomy	4.429747	nus1
	hedgehog	3.794280	spi1	3.447021	irx3	9.188895	olfactory	3.377588	ino80b	5.940860	pentameric	6.505706	origins	5.639946	chil3	5.576078	clathrin-coated	3.338467	msr1	14.874297	palmitoylation	4.291274	sfrp4	6.137772	trim30a	5.490612	prenyltransferase	4.907177	smo	7.281533			lcp1	3.211888	ap2a1	9.567976	mmrn2	10.333656	snf	4.312460	40s	4.485780	gestation	3.496763	craniofacial	3.643644	psa	4.545747	5-trisphosphate
	smoothed	3.881720	pdzk1ip1	3.376293	pbrm1	8.732950	olfactory	3.429709	pbrm1	3.776922	osmiophilic	7.379746	mcm	5.824309	spi1	5.548176	clathrin	3.361288	aif1	14.131492	depalmitoylation	4.568705	s100a8	4.579233	ap2a1	5.193787	dolichyl	4.939677	kctd5	7.033967			rage	4.503968	smo	9.103900	ptpn6	7.989260	nucleosomes	4.382319	90s	4.678727	multiples	3.601104	micrognathia	3.662623	adenosis	4.695870	dag
	gli	4.311141			nr2f6	8.14824	sensory	3.863315	kitochores	3.893372			pof3	6.277708	dnm3	5.308811	endocytic	3.396446	chil3	12.312624	s-palmitoylation	4.782914	ptpn6	3.359772	cpb1	4.697402	homodimeric	5.009016	mpeg1	6.712200			glycation	4.511641	inpp5d	8.237879	galntl6	7.829855	swi	4.428582	polysomes	4.857202	gonadotropin	3.633847	mandibulofacial	3.775804	atypia	4.920671	diacylglycerol
	patched	4.436158			olfr17	6.464952	sensory	3.872002	kitochores	3.895478			paving	6.754100	cybb	4.912075	dynamin	3.435373	ptpn6	12.288285	membra-associated	5.291950	adipoq	3.028214	mmrn2	4.324199	polyprenol	5.267040	ednrb	5.604542			s100	4.928969	adipoq	7.210577	gpm6b	7.523952	nucleosomes	4.472718	nucleolus	4.894652	translucency	3.644829	palate	3.823826	cribriform	5.067490	inositol-1
	ventral	4.499199			mpeg1	5.723960	olfactory_bulb	4.263832	kitochore	4.127023			armadillo	7.022838	lgr6	3.458552	clathrin-coated_vesicles	3.487695	fcgr3	10.883690	myristoylation	5.415132	aif1	3.017604	hmcn1	3.657030	dehydrodolichyl	5.597494	csf3r	5.266176			puncture	4.931104	kctd5	7.081656	irx3	7.032586	atp-dependent	5.003972	23s	4.895446	nuchal	3.682769	palate	3.827483	asap	5.229405	5-phosphatase
	uroepithelial	4.588393			cenpo	5.094416	chemosensory	4.333509	asynchronous	4.855046			cleavage-dependent	7.132816	dap12	4.263146	pits	3.533206	inpp5d	10.700498	protein-cystei	5.828776	cancer-associated_fibroblasts	3.894195	lcp1	3.656340	nocardia	6.896441	lcp1	5.049471			calprotectin	5.002166	vsnl1	7.003721	selp	4.060699	pbaf	5.091245	nucleolus	4.899323	uteri_artery	3.892956	facial_bos	3.877779	cytologic	5.285574	pip3
	uroepithelial	4.594540			nudt7	4.531531	bulb	4.432831	fission	4.915970					tyrosi-based	4.993017	clathrin-dependent	3.737639	rps26	9.480829	farsylated	6.779824	cancer-associated	4.036163	protease	3.632131			car1	4.905976			clp	5.214523	dnm3	6.730946	fcgr3	3.897602	rhabdoid	5.422467	snornp	5.085716	ultrasound	3.951697	ear_middle	4.061796	peroxisomal	5.763308	shc
	morphogen	4.607482			sfrp4	3.948444	pheromos	4.470686	septation	4.917624					immunoglobulin-like	5.110596	transferrin	3.997540	jag1	8.436580			fibroblast	4.525919	proteases	3.925337			trim30a	3.930105			endotoxemia	5.324543	jag1	6.641052	s100a8	3.344584	rsc	5.494040	polysome	5.118501	median	3.955229	ear_external	4.113787	branched-chain	6.116081	polyphosphate
	diencephalon	4.771329			jag1	3.633282	odorant	4.484957	tension	4.936599					presenile	5.505947	caveolae	4.020305	selp	8.287907			pet	5.064559	proteolytic	4.103824			dennd1a	3.424100					gpm6b	6.251588	sialic	3.751638	atpases	5.631587	27s	5.252798	trisomy	4.081863	maxilla	4.148227	beta-oxidation	6.318217	phosphatidylinositol-3
	diencephalon	4.771656			stmn1	3.509578	odor	4.542438	misalignment	4.957367					sclerosing	6.055916	coated	4.026942	trem3	8.242172			tumoral	5.291584	peptidase	4.384878			adgrg1	3.421447					bend5	5.927796	n-glycan	3.855291	swr1	5.876347	processome	5.316965	pre-eclampsia	4.199804	maxilla	4.158446	periurethral	6.854110	monoacylglycerol
	hindbrain	4.941825			tss	4.056672	vomeronasal	4.683347	cenp-a	5.367019					raw_264	6.104953	caveolae	4.048930	lgr6	4.361822			nonoplastic	5.788756	ecm	4.793209			nus1	3.123751					ednrb	5.655545	n-glycans	3.941844	meningothelial	7.538233	sedimentation	5.668995	obstetric	4.229833	malar	4.221706			acylating
	midbrain	5.065250			promoters	4.302131	olfactory_mucosa	4.782122	catastrophe	5.375161					trif-dependent	6.606804	ap-2	4.163570	adgrg1	4.205298					endopeptidase	4.874871			amacr	3.085071					csf3r	5.509420	sialylation	3.971976	psammomatous	7.751208	mpp10	5.801822	stillbirth	4.259479	dysostosis	4.318926			sesamin
	medulloblastoma	5.149150			mark	4.475695	dorsomedial	5.381541	depolymerizing	5.558777							microdomains	4.268726	smo	3.688176					gelatinase	4.980319			endocytosis	3.815501					lpxn	5.406984	glycosylation	4.277946			preribosome	5.939570	antenatal	4.700638	conductive	4.332509
	gorlin	5.193097			methylase	4.970730	tactile	6.090753	small-molecule	6.710643							microdomains	4.278844	nr2f6	3.256394					serpin	5.030235			internalization	3.899984					ms4a3	5.371706	lectin	4.421512			polysomal	6.554815	abortion	4.768157	ears	4.360734
	gli3r	5.358225			e2f	5.205560	sensitization	6.617759									coated_vesicles	4.287315	pdzk1ip1	3.226299					proteinases	5.034679			dynamics	3.969116					mdk	5.029009	sialyltransferase	4.456432			pyrophosphohydrolase	7.443572	10th	4.804428	ear	4.408131
	desmoplastic	7.123868			anti-sense	5.334371	cramp	6.863236									pit	4.416315	il31	3.067311					collagenase	5.079122			phagocytosis	4.012590					zfp628	4.912375	n-linked	4.521321			diadenosi	7.535508	abruption	4.931094	ear	4.417662
																	raft	4.546413	myeloid	3.286464					alpha-1	5.578751			particle	4.289231					mmrn2	4.738792	mannose	4.605489			mapkkk	7.667908	gestations	4.983449	deformities	4.418271
																	caveolar	4.691156	myeloid	3.309240					igfbps	5.633567			specialized	4.379189					spi1	4.623497	n-glycosylation	4.684175			mapkk	8.075948	venosus	5.091088	arches	4.424167
																	endocytotic	4.781825	marrow	3.345997					antitrypsin	5.663416			constitutive	4.444750					trem3	4.225899	n-acetylglucosaminyltransferase	4.819822			calcifying	8.307656	triploidy	5.286832	malleus	4.439324
																	flotillin	5.207496	marrow	3.364922					oligopeptidase	5.829367			scission	4.547875					lcp1	4.205703	galactosylation	4.923500					dichorionic	5.444603	malleus	4.466236
																	internalisation	5.293285	hematopoietic	3.455643									receptor-mediated	4.549371					mpeg1	3.924217	ncam	5.484228					uta	5.669908	cranial	4.653436
																	ap-3	5.397282	utrophils	3.472648									cytochalasin	4.577632					amacr	3.507437	c-type	5.766131					antepartum	5.769514	incus	4.664630
																	heterotetrameric	5.801717	utrophils	3.515413									phagosomes	4.614020					lum	3.221411	arginase	6.517005					iud	5.813875	incus	4.672831
																	thioester	6.820662	macrophage	3.648600									phagosomes	4.623746					fcgr3	3.208022	chitinase	6.628539					pre-eclamptic	6.379359	choanal	4.702374
																	nucleophile	7.340435	utrophil	3.651214									engulfment	4.733090					endothelial	3.456160	pan-ural	8.176885					chorioamnionitis	6.888327	robin	4.816666
																			granulocyte	3.661516									macropinocytosis	4.873059					endothelial	3.525993							maternofetal	7.104815	microtia	4.942860
																			cytokis	3.761525									empty	4.919576					undergo	3.566922									pierre	5.105600
													K						hematopoietic_stem	4.119531									pinocytosis	5.035540					resident	3.633057									ear_ossicles	5.185299
																			colony-stimulating	4.134337									agonist	5.045256					cascade	3.640609									skeleton	5.267415
																			erythroid	4.166817									branched	5.224531					hours	3.717700									mastoid	5.325753
																			granulocytic	4.289654									biotinylation	5.320236					monocytes	3.803340									mastoid	5.327864
																			hematopoiesis	4.313410									probing	5.344666					monocytes	3.825402									auricular	5.854392
																			utropenia	4.443924									truncation	5.349002					leukocytes	3.967439									nasal_septum	7.069426
																			utrophilic	4.472971									latex	5.386181					triggering	3.977971									hemimelia	7.130223
																			responsive	4.610972									micropinocytosis	5.549470					profound	3.999619									metacarpal_bos	7.137896
																			niche	4.617067									special	5.560554					transmembra	4.056287									toe_joint	7.248651
																			phagocytic	4.617884									codon	5.592529					immediately	4.062409
																			utrophilia	4.671733									caveolin-mediated	5.758349					glycoprotein	4.169692
																			phagocytes	4.718676									adapters	6.184249					paracri	4.184249
																			phagocytes	4.730116									fcgamma	6.883197					lps	4.240119
																			hscs	4.771372															focal	4.243032
																			granulopoiesis	4.775911															defense	4.245895
																			gmp	4.866135															inability	4.258064
																			homing	4.973707															polarization	4.267465
																			granulomatous	4.990955															adaptor	4.327408
																			utropenic	5.029654															past	4.382025
																			phagocyte	5.079259															conditiod	4.406381
																			burst	5.079993															zo	4.426935
																			megakaryocyte-erythroid	5.395755															round	4.462865
																			leukopenia	5.573383															vegf	4.497485
																			erythroid_precursor	6.119810															caspase	4.514210
																			hepatic_stellate	6.145634															ligation	4.517148
																			b558	6.359136															histology	4.598125
																			macrocytic	6.391777															isotype	4.647998
																			sphenoid_sinus	7.904990															granule	4.666846
																																			monocytic	4.710104
																																			dissociated	4.716980
																																			extrinsic	4.803800
																																			abrogates	4.920245
																																			protein-1	4.926656
																																			recurrent	4.993938
[truncated: 15 more columns]

## Sheet: Suppl. Table 2.4
Supplementary Table 2.4 Compbio outputs based on the downregulated DEGs from microarray on AF tissues; DQ vs. Control
Theme	Transcription of E2F targets under gative control by p107 (RBL1) and p130 (RBL2) in complex with HDAC1		Thyroid-stimulating hormo-secreting cell development		Hyperphosphorylation (Ser2) of RNA Pol II CTD by the P-TEFb(Cyclin T1:Cdk9) complex		Cyclin-dependent protein seri/threoni kinase activator activity		Urokinase plasminogen activator (o-chain):uPAR -> urokinase plasminogen activator (two-chain):uPAR		Response to phorbol 13-acetate 12-myristate (PMA)		CAMP/CREB Signaling		TAK1 activates NF-kappaB by phosphorylation and activation of IKK complex		TAK1-mediated JNK phosphorylation/activation		Monocyte chemotactic protein-1 (MCP-1) production		CD95 death-inducing signaling complex		Polo-like kinase 3 (PLK3) pathway		Tristetraprolin (TTP, ZFP36) binds and destabilizes mRNA		Cribriform		Abdominal situs inversus		Albinism, Oculocutaous related		UBC9 (UBE2I) SUMOylates RANGAP1 with SUMO, which targets RANGAP1 to RANBP2		Phosphatidylinositol-4,5-bisphosphate phosphatase activity		Defective G causes sialuria, Nonaka myopathy and inclusion body myopathy 2		Monocyte Chemotaxis and Osteoclast Differentiation		(-) regulation of PERK-mediated unfolded protein response		NuA4 histo acetyltransferase complex		Regulation of ornithine decarboxylase (ODC)		PKM2 pyruvate kinase complex		Prenylation/Geranylation
Thematic Enrichment Score	30384.1		19368.8		18521.3		14396.3		11922.3		16869.3		9284.4		27428.1		17644.2		14387.5		12941		9846.78		58989.7		45504.1		24093.4		22631.2		20396.9		19883.4		19179.8		16766		16539.1		14688		13047.9		13006.2		12663.9
Coordinates in 3-D Space	X: 16.84,Y: -5.06,Z: 38.83		X: 42.94,Y: 4.41,Z: 11.86		X: 19.38,Y: 4.38,Z: 37.50		X: 27.65,Y: -5.20,Z: 28.24		X: 28.73,Y:-29.51,Z: 3.95		X: 9.12,Y:-17.28,Z: 39.01		X: 28.40,Y:-14.96,Z: 28.32		X: 24.72,Y: -7.87,Z: 31.89		X: 21.34,Y: -5.66,Z: 29.66		X: 24.33,Y:-11.76,Z: 31.19		X: 21.70,Y: -5.70,Z: 36.51		X: 0.58,Y: -8.97,Z: 41.91		X: -9.21,Y: 33.54,Z:-23.50		X: 35.37,Y: 21.70,Z: 14.02		X: 40.15,Y: 11.51,Z: -5.88		X:-37.03,Y: 22.62,Z: -8.18		X: 22.28,Y:-12.72,Z:-36.42		X: 44.04,Y: 8.60,Z: -8.04		X: -3.44,Y:-39.72,Z: 7.04		X:-14.32,Y: 5.87,Z: 39.37		X: 23.87,Y: 9.69,Z: 32.25		X: 23.91,Y: 29.73,Z:-18.89		X:-14.55,Y: 15.82,Z: 38.67		X:-25.05,Y: 6.22,Z: 28.01		X:-18.85,Y: 39.32,Z: 1.49
Entity Total	36		8		37		44		10		30		20		43		55		39		25		3		25		16		12		8		8		23		6		24		17		19		7		6		8
Concept Total	23		25		16		27		14		15		9		38		38		40		32		5		26		5		29		21		9		6		21		19		15		10		5		19		15
P-Value	0.122		0.2		0.144		0.182		0.122		0.16		0.168		0.128		0.151		0.147		0.164		0.223		0.023		0.015		0.199		0.202		0.271		0.23		0.157		0.119		0.104		0.204		0.227		0.196		0.153
NEScore	1.279		1.214		1.27		1.237		1.317		1.254		1.279		1.266		1.262		1.278		1.267		1.218		1.784		1.694		1.199		1.204		1.151		1.186		1.26		1.296		1.325		1.22		1.198		1.233		1.28
Entity (gene)	Entity/Concept	Enrichment Score	Entity/Concept	Enrichment Score	Entity/Concept	Enrichment Score	Entity/Concept	Enrichment Score	Entity/Concept	Enrichment Score	Entity/Concept	Enrichment Score	Entity/Concept	Enrichment Score	Entity/Concept	Enrichment Score	Entity/Concept	Enrichment Score	Entity/Concept	Enrichment Score	Entity/Concept	Enrichment Score	Entity/Concept	Enrichment Score	Entity/Concept	Enrichment Score	Entity/Concept	Enrichment Score	Entity/Concept	Enrichment Score	Entity/Concept	Enrichment Score	Entity/Concept	Enrichment Score	Entity/Concept	Enrichment Score	Entity/Concept	Enrichment Score	Entity/Concept	Enrichment Score	Entity/Concept	Enrichment Score	Entity/Concept	Enrichment Score	Entity/Concept	Enrichment Score	Entity/Concept	Enrichment Score	Entity/Concept
Concept	rbl1	924.274189	slc20a1	1244.039493	jmjd6	141.053925	jun	55.509594	plaur	818.230091	rcan1	525.058690	pde4b	291.814191	jun	185.283840	dusp6	33.783259	wsb1	43.769794	tnfrsf10b	290.843988	plk3	1895.523135	zfp36	1126.520830	nr4a3	2018.950733	dnah11	811.786282	hps4	1492.351067	senp5	1892.271841	mafk	627.144655	g	1406.770631	plekhm1	248.004925	atf4	455.908295	trrap	800.466204	azin1	1552.297782	hk2	772.415705	rhob
Cell Cycle Regulation	myc	46.785558	map3k3	18.925722	myc	68.430454	atf4	50.969597	jun	17.789049	egr1	65.647709	atf2	75.568717	mapk6	67.183172	rhob	33.186212	junb	39.069906	ints10	82.957288	errfi1	4.860808	zfp36l1	538.406010	nr4a1	1697.381353	tmem231	210.064199	plekhm1	38.398188	safb2	17.833333	maff	581.410253	bivm	92.662388	fchsd1	159.882939	irf1	259.838922	eaf2	63.349115	taar9	68.674211	me3	268.390301	zdhhc18
JNK/TAK Signaling and Cell Death	trrap	30.716953	nr4a1	8.896020	jun	61.823162	dusp6	45.593378	tnxb	12.311898	jun	37.832339	gpr52	32.700442	oprk1	55.166295	jun	28.099489	jun	38.769227	tnfrsf12a	26.771163	myc	4.243345	thoc1	238.162454	gpr52	362.157634	cfap54	91.826347	nras	28.572315	irf1	6.301760	ptgs2	121.096509	saa2	12.046745	rhou	121.015655	ppp1r15a	132.460271	atf2	19.326765	myc	31.147446	myc	11.467860	rhebl1
Unassigned	plk3	23.936604	lepr	8.169123	polr3g	61.633622	dusp8	33.309430	tspan10	9.027989	fos	27.054253	atf3	30.371229	atf2	53.289855	mapk6	27.677587	zc3h12a	34.210835	jun	18.772553	catastrophe	5.068166	hnrnpf	215.076704	iffo2	77.464757	fosb	84.401784	nfkbiz	16.313976	klf4	5.082009	sfxn5	32.240387	ubxn7	9.255777	hip1	117.269213	atf3	37.571026	myc	11.228926	fos	13.806741	acsl1	6.871462	rhou
	btg2	20.997436	egr1	6.789724	trrap	55.876496	atf2	30.864767	fos	6.952862	myc	26.035885	fos	27.171793	ptgs2	45.385705	nras	26.405909	ptgs2	29.886946	atf4	18.495184	polo-like	5.616606	zc3h12a	187.365758	junb	35.170544	gpr52	66.442471	tspan10	12.527642	acsl1	4.332139	atf3	21.169781	plaur	6.132185	tnfrsf10b	31.978186	ier3	18.204323	jmjd6	10.341151	jun	7.229568	usp45	6.622518	nras
	gadd45g	19.635	nr4a3	4.773472	fos	52.146274	ptpru	25.607278	junb	4.053715	junb	25.726979	slc20a1	20.742179	fos	40.091029	rhou	25.689923	ackr3	28.107941	thoc1	12.784161	monopolar	5.730985	nufip2	49.221728	egr1	19.849088	tspan10	22.528146	erc1	5.772816	jun	4.053430	jun	17.982868	tnfrsf12a	5.161739	fos	28.917456	zbtb14	16.800353	klf2	9.229484	ptgs2	5.579711	ndufs1	6.181643	klf6
	klf2	15.903782	fos	4.500483	junb	45.649073	atf3	17.952119	egr1	3.745051	tnfrsf10b	11.529694	nr4a1	19.503513	tnfrsf10b	38.708292	fos	21.250027	fos	25.525182	myc	12.768617	polo	5.892240	fastkd1	43.331780	ackr3	19.304497	fos	14.471154	fosb	3.799192	bhlhe40	3.623845	junb	16.816946	weakss	4.284026	hps4	21.564637	dusp8	13.081172	rbl1	7.617832	acsl1	3.798530	glycolysis	3.390710	rcan1
	sertad1	15.635412	gadd45g	3.824691	mafk	41.176932	fos	17.582454	ptgs2	3.654381	nr4a1	10.758573	egr1	19.074008	dusp6	33.676074	myc	19.548021	fosb	23.524403	ptgs2	8.061069	extracapillary	8.382811	rbm4	37.041991	ptpru	17.698106	egr1	6.695498	map3k3	3.222811	myc	3.480966	nras	14.858561	myopathy	4.380284	ackr3	14.743184	jun	10.238273	hoxb9	7.477587	odc	3.105808	pyruvate	3.508830	klf2
	jun	12.926791	somatotrophs	3.757826	atf2	36.946628	egr1	15.643064	myc	3.198358	mafk	10.709832	jun	18.467508	map3k3	30.364472	atf4	16.543889	plaur	19.510104	rhebl1	6.830706			safb2	32.541909	fosb	13.979054	nr4a1	5.367069	hermansky-pudlak	4.630466	sumoylated	3.026405	fosb	14.346450	quadriceps	4.761363	baiap2l1	11.575331	saa2	7.152910	tnfrsf10b	7.161551	polyami	3.227580	glycolytic	3.520250	prenylation
	egr1	10.957867	somatotrophs	3.775930	fosb	33.221331	rbl1	14.684367	ica1l	3.151189	ptgs2	9.844454	fosb	17.838695	junb	30.095679	atf2	15.871154	tnfrsf12a	17.064703	nr4a1	6.715387			ier3	30.126383	fos	10.460149	oprk1	4.532843	bloc-3	4.689780	sumo	3.264168	fos	13.023783	2-epimerase	4.789674	arhgap12	10.128415	zfp36	6.470244	irf1	5.677232	polyamis	3.280539	aerobic	3.662921	farsylated
	klf4	8.794733	pituitary_gland	4.162431	atf3	24.036862	ptgs2	13.124420	fibrinolysis	4.744056	dhx32	9.346274	atf4	15.693049	atf4	28.252761	egr1	15.207154	tnfrsf10b	15.975271	atf3	6.319210			jmjd6	27.292431	taar9	7.644548	bivm	4.476778	melanosomes	4.831565	ubc9	3.329297	tsr1	12.879683	tibialis	4.803943	vps37b	9.969902	atf2	6.250024	fchsd1	5.396172	decarboxylase	3.433776	phosphofructokinase	3.982320	caax
	fos	8.640737	corticotrophs	4.303932	eaf2	19.160672	junb	12.437791	plasmin	4.952646	atf2	8.466758	junb	14.303516	dusp8	24.790909	dusp8	13.689376	irf1	15.484322	errfi1	5.455933			btg2	21.541871	hk2	7.608017	azin1	4.308854	ap-3	4.840177	desumoylation	3.414605	egr1	10.592662	quadriceps	4.816091	jun	7.376218	junb	6.069316	nr4a1	5.357526	ubiquitin-independent	4.545153	glut1	4.066237	farsylation
	zfp36l1	8.411289	corticotrophs	4.335761	egr1	18.667740	myc	11.920890	upar	5.226596	atf3	7.671582	ptgs2	9.156821	klf2	24.653311	tnfrsf12a	13.430106	klf2	12.297528	fos	4.317314			myc	17.603312	azin1	7.212017	dyskisia	4.686503	melanosomes	4.866290	sumoylation	3.651540	plaur	8.187683	sialic	5.096591	rhob	6.712544	dusp6	4.873035	emp1	5.354243			hexokinase	4.353893	geranylgeranyl
	atf3	7.458247	prolactin	4.431529	atf4	18.482991	nfkbiz	11.246257	clot	5.256553	polr3g	7.095493	oprk1	9.043553	egr1	24.247319	junb	13.350099	atf2	12.251568	hip1	4.223964			rbpms	14.695270	klf4	4.829665	hyperkitic	4.776339	bloc-2	5.211716	sumo-specific	3.777409	atf2	8.114999	udp-n-acetylglucosami	5.218557	egr1	6.188818	tnfrsf10b	4.687803	fos	4.891113			glucose-6-phosphate	4.434934	prenylated
	junb	7.228578	pituitary_gland_anterior	4.483109	maff	17.144195	nr4a1	10.310558	fibrinolytic	5.285965	plaur	6.582868	defb14	8.496611	atf3	24.235583	arhgap12	13.042723	nfkbiz	11.490984	egr1	4.193816			fos	9.000904	jun	3.738862	situs	5.096705	albinism	5.212021	sumo-dependent	3.881636	klf10	6.559053	sialylation	5.341844	errfi1	6.127385	rbm4	4.329426	jun	4.521217			lactic	4.608679	farsyltransferase
	atf2	7.063261	gonadotrophs	4.511175	ints10	14.614951	ier3	9.983668	tpa	5.781517	safb2	6.176059	nr4a3	7.449625	myc	22.143959	plk3	11.391689	atf3	11.384968	irf1	4.078534			ptgs2	7.890917	g	3.227245	asymmetry	5.142425	oculocutaous	5.268168	isopeptidase	4.078138	hk2	6.288556	myopathic	5.429617	plaur	5.128204	egr1	4.147761	egr1	4.452332			pep	4.810518	geranylgeranylation
	nras	6.548918	gonadotrophs	4.522531	klf4	13.353375	klf2	9.272937	pericellular	6.478836	irf1	5.201807	ackr3	6.505280	zfp36	15.559251	rhebl1	10.715985	egr1	10.755058	dusp6	4.026670			exd2	7.322694	nor-1	3.571712	ciliary	5.210306	melanosome	5.510781	sumoylate	4.525188	me3	5.937134	epimerase	5.618327	erc1	4.626581	fos	3.488470	acsl1	3.889576			pkm2	4.934365	farsyl
	klf6	6.533298	lactotrophs	4.532731	bhlhe40	12.610796	plk3	9.092779	kringle	6.679227	rhou	5.028311	rcan1	4.919412	fosb	15.518531	rbl1	10.647118	saa1	10.365069	sertad1	3.913830			plekhm1	6.053709	nurr1	4.166785	ciliary	5.246520	bloc-1	5.712558			zfp36	5.152113	nonaka	5.787642	ptgs2	3.938061	pkr	4.508469	klf4	3.613298			malic	4.965459	palmitoylation
	plaur	6.514477	lactotrophs	4.537517	ubxn7	12.540778	ppp1r15a	8.219646	hematoma	6.715185	bhlhe40	4.984813	myc	4.337785	nr4a1	14.176593	fastkd1	10.425926	zfp36	9.587061	gadd45g	3.784141			rhob	5.397092	acinic	4.466313	inversus	5.285562	diathesis	5.744355			nfkbiz	5.096175	satellite_skeletal	6.178040	zbtb14	3.771281	unfolded	4.983331	atf3	3.034253			pdh	5.000842	isoprenoid
	atf4	6.108984	cavernous_sinus	4.641283	rbl1	12.453812	oprk1	8.203677	intracerebral	6.754672	nr4a3	4.624414	btg2	3.153502	nfkbiz	13.536553	ackr3	10.229644	cd55b	7.569264	ackr3	3.697143			egr1	5.260512	orphan	4.830110	totalis	5.657539	melanosomal	6.055138			myc	4.728086	inactivity	6.192602	tnfrsf12a	3.618900	shutoff	5.181190	hats	4.303790			decarboxylation	5.068594	depalmitoylation
	thoc1	6.060495	thyrotrophs	4.855380	slc20a1	10.476191	rcan1	7.799240	amino-terminal	6.796542	ackr3	4.386979	camp	3.486155	btg2	13.384133	atf3	9.924809	oprk1	6.941101	ier3	3.637712			jun	4.986206	cribriform	5.610522	bronchiectasis	5.731570	bloc	6.066168			arhgap12	4.655253	immobilization	6.314256	avl9	3.274088	upr	5.293205	acetyltransferase	4.357310			glutaminase	5.409673	pat
	zbtb14	6.055791	thyrotrophs	4.861431	klf2	9.904106	mapk6	7.551177	subdural	7.473847	plk3	3.880103	cyclic	3.502009	tnfrsf12a	12.774656	ptgs2	9.910504	tnfaip2	6.552215	hk2	3.585035			nfkbiz	4.371212			dyskitic	5.755339	granulomatous	6.711164			atf4	3.283954	plantaris	6.408868	slc20a1	3.241846	perk	5.572358	deacetylase	4.703268			hk1	5.678285	caax-box
	rad9b	5.946566	thyroid-stimulating	4.947620	nr4a1	9.829010	btg2	7.533211	crossbridge	7.877919	ier3	3.705682	amp	3.745676	zc3h12a	12.279223	zfp36	9.677123	defb14	6.519032	plaur	3.314546			plaur	3.983373			sinusitis	5.761280	mon1-ccz1	6.748386			irf1	3.183639	unloading	6.490670	junb	3.237883	irf	5.922041	pcaf	5.057062			non-glycolytic	5.697517	thioester
	rhob	5.833803	nonfunctioning	5.162414	klf6	9.232844	sertad1	7.412723	chemo-mechanical	8.882767	slc20a1	3.695891	creb	4.127088	gadd45g	11.721283	ppp1r15a	9.313067	saa2	6.053334	junb	3.159318			junb	3.099131			hydrocephalus	5.845766	melanocytic	7.481516			phosphatidylinositol-4	5.292156	mannosami	6.644173	mast4	3.067796	ddx58	6.071568	gcn5	5.234783			dikinase	7.224786
	zc3h12a	5.558775	cavernous	5.251363	sertad1	8.885827	ppp4r1	7.277089			ints10	3.607696	monophosphate	4.132570	irf1	10.071716	nr4a1	9.243543	nr4a1	5.684960	zc3h12a	3.078080			tsr1	3.058601			beat	5.940619	hsp4	7.728473			5-bisphosphate	5.504132	ctx	6.664185	pits	4.431896	vaccinia	6.079799	nua4	5.493642			francisella	7.739541
	tnfrsf10b	5.431649	hypopituitarism	5.302458	irf1	7.878173	irf1	7.168702			zfp36	3.605619	forskolin	4.302921	ier3	9.676814	plaur	8.720809	atf4	5.125397	caspase	3.598865			rna-binding	3.449187			axome	5.952998	tubulation	8.182056			fibrosarcoma	5.595571	immunoglobulin-like	7.163998	osteoclasts	4.558122	h1n1	6.086808	hydroxamic	5.592634
	ptgs2	5.106878	hormo-secreting	5.436337	klf10	6.205982	gadd45g	6.701252			maff	3.353031	phosphodiesterase	4.358091	plaur	9.418017	map3k3	7.663842	me3	5.077562	caspases	3.624551			decay	3.471344			axome	5.967512	osteosclerosis	8.793593			musculoapourotic	5.619553	3-sialyltransferase	7.183908	osteoclasts	4.625325	ire1	6.102667	compass	5.801673
	nr4a1	5.083376	acromegalic	5.949057	zfp36	5.599820	zc3h12a	6.666688			ier2	3.328444	a2a	5.007961	erc1	6.827407	klf4	7.170007	ier3	5.065545	apoptotic	3.652497			au-rich	3.553214			kartager	6.154136	phagosome-lysosome	8.819454			thymoma	5.891753			resorption	4.627021	perk-mediated	6.134708	mll1	6.024435
	dusp6	4.861752	suprasellar	6.216196	ptgs2	4.979440	fosb	6.549430			fosb	3.166920	a2b	5.109456	rbl1	6.762524	hk2	6.914565	lepr	4.536812	caspase-8	3.779416			post-transcriptional	3.558619			otitis	6.337194	breathing-related	9.025352			prostaglandin-endoperoxide	6.002548			osteoclast	4.780556	poxvirus	6.275900	depsipeptide	7.395334
	wsb1	4.815122	acidophil	6.348876	azin1	4.950783	tspan10	6.451936			klf10	3.157939			klf6	6.362675	rcan1	6.817148	tspan10	4.498944	caspase-3	3.797181			actinomycin	3.844905			dextrocardia	6.357184									podosome	5.267979	isgf3	6.459320
	zfp36	4.745680	thyrotropic	6.913204	zbtb14	4.463755	tnfrsf10b	6.078367			jurkat	4.361873			plk3	6.358982	fosb	6.465299	myc	4.476399	extrinsic	4.040617			ribonucleoprotein	3.850981			striatal	6.359277									podosomes	5.324789	isre	6.463351
	ier3	3.817382	intrasellar	7.974243	safb2	3.882787	ackr3	5.662375			jurkat	4.376497			nras	5.972511	btg2	6.428157	mafk	4.078722	ligand	4.044407			hur	3.859279			lid	6.482407									podosomes	5.332865	ire1-mediated	6.961476
	bhlhe40	3.638581	gg-r	9.111194	hk2	3.444641	klf4	5.094836			13-acetate	4.604416			klf4	5.928495	tnfrsf10b	6.098660	pde4b	3.825649	proapoptotic	4.154680			hnrnp	3.961871			parkinsonian	6.951463									osteopetrosis	5.553784
	mapk6	3.474303			zfp36l1	3.329677	mafk	4.781086			12-myristate	4.667280			rhob	5.864938	klf10	6.048640	dusp8	3.658159	blocked	4.192174			tristetraprolin	3.991015			striatonigral	6.988440									decoy	6.043078
	ppp1r15a	3.371597			rcan1	3.155136	hk2	4.625841			nfat	4.885160			ackr3	5.643885	etv5	6.032171	bhlhe40	3.326164	trail	4.340192			destabilization	4.162133			darpp-32	7.110945									bisphosphonates	6.064637
	irf1	3.219037			etv5	3.116438	zfp36	4.591471			calciurin	5.378701			saa1	5.473945	errfi1	5.914702	klf6	3.268680	bak	4.379260			deadenylation	4.244508			medial_forebrain_bundle	7.130278									clathrin-coated	6.106932
	arrest	3.545530			btg2	3.076314	klf6	4.536721			k562	5.437030			rcan1	5.388122	nr4a3	5.886384	klf4	3.184395	death-inducing	4.673636			ttp	4.248484			monochorionic	7.179658									osteolytic	6.112498
	retinoblastoma	3.780298			repress	4.169215	tnfrsf12a	4.218802			k562	5.447193			errfi1	4.873754	irf1	5.874642	errfi1	3.104102	feedback	4.752159			mrnp	4.277587			l-3	7.206531									clathrin-mediated	6.333698
	p21	3.825203			transactivation	4.630557	klf10	4.076991			monocytic	5.530403			ppp1r15a	4.686476	zc3h12a	5.756674	maff	3.026911	caspase-7	4.821039			mrna-binding	4.335138			striatopallidal	7.222841									sh3	6.335992
	e2f	3.890612			represses	4.752643	plaur	4.049044			hl-60	5.571671			hk2	4.436337	trrap	5.574871	monocyte	3.531834	cd95	4.894866			auf1	4.427027			septi	8.694793									clathrin	6.502003
	cdk	4.018518			cofactors	4.833462	rhob	3.869456			hl-60	5.573857			pde4b	4.012920	avl9	5.409209	crosis	3.672593	non-apoptotic	5.038087			destabilize	4.451703			cavum	8.825065									ap-2	7.200628
	cyclin	4.038477			pol	4.966706	mast4	3.826286			cyclosporin	5.656186			lepr	3.253485	slc20a1	5.222353	activator	3.786548	staurospori	5.131114			ksrp	4.658810													thrombasthenia	7.262498
	quiescent	4.412344			co-factors	5.506759	bhlhe40	3.805619			calciurin-mediated	6.160014			nr4a3	3.008969	klf2	4.773695	nitric	3.864814	procaspase-8	5.135617			uridi-rich	4.827330													f-bar	7.792228
	p107	4.436534			zipper	5.512665	slc20a1	3.429686			pma-inducible	6.345860			c-jun	3.492116	gtpbp2	4.361961	oxide	3.867275	c-flip	5.153228			ribonucleoproteins	4.940321
	p130	4.456647			pause	5.740907	jnk	3.491622			calciurin-nfat	6.725883			induces	3.573651	ier3	4.221342	lipopolysaccharide	3.879745	tnfr1	5.182495			domain-containing	5.039791
	cycle	4.486971			transactivating	5.776591	phosphorylated	3.587439							mitogen-activated	3.650541	klf6	3.825234	chemokis	3.892121	apoptogenic	5.211795			labile	5.162425
	sescent	4.606409			demethylase	5.900243	anti-apoptotic	3.838160							p38	3.777365	ptpru	3.818817	lps	3.933125	survivin	5.457635			tho	5.653784
	cycling	4.641324			pausing	5.948746	stress-induced	3.950081							cascade	3.824038	hps4	3.663787	chemoki	3.987529	add	5.502247			intronless	5.698141
	sescence-associated	4.721197			myc-max	6.260812	blocking	3.978700							stimuli	3.856557	zfp36l1	3.635114	chemoattractant	4.120380	rapamycin	5.568421			nuclear_matrix	6.097822
	quiescence	4.849012			dimerizing	6.460093	threoni	4.213220							erk	3.889369	safb2	3.587437	sustaid	4.213955	cd95l	5.605963			fas-activated	6.164569
	oncoge-induced	4.910969			ap-1-mediated	6.838853	uron	4.330896							bcl-2	3.913955	gadd45g	3.583289	protein-1	4.264019	caspase-6	5.648125			interposition	7.205480
	adenovirus	4.984110			factor-mediated	6.912078	ros	4.413059							cascades	4.164602	lepr	3.375475	circulation	4.274175	tnfr2	5.830769
	ionizing	5.005352			c-mediated	7.171998	deprivation	4.553860							phosphorylation	4.187541	mast4	3.347328	chemotactic	4.308262	caspase-10	5.847272
	chk2	5.096951					cyclin-dependent	4.633866							erk1	4.189205	nfkbiz	3.206780	ap-1	4.365027	bir	6.158887
	chk1	5.201197					withdrawal	4.731301							p65	4.214141	ppp4r1	3.183608	antagonist	4.431162	tnfr1-mediated	7.057494
	adenoviral	5.349441					hyperphosphorylation	4.742286							pro-apoptotic	4.352593	activates	3.439107	chemotaxis	4.470111	integrator	7.171527
	rb-e2f	5.372283					autocri	4.796016							activated	4.382054	kinases	3.523725	agonist	4.486867	tor	7.336697
	sasp	5.527429					phosphatases	4.890967							stress-activated	4.472442	activating	3.586434	interleukin-6	4.573754
	ataxia-telangiectasia	5.873559					pc12	4.907374							nf-kappab	4.592972	basal	3.586456	interfering	4.598150
							pc12	4.911009							ikk	4.692175	interest	3.780315	macrophages_peritoal	4.650539
							modulators	4.927318							kappa	4.734924	mapk	3.798902	tnf	4.674793
							ischemic	4.940258							p50	4.799516	constitutive	3.828432	nf-kb	4.695682
							uroprotection	4.989304							inflammatory	4.887135	ras	3.834748	gm-csf	4.779136
							enhancer	5.018025							inflammation	5.102636	transformation	3.901505	macrophages_alveolar	4.831491
							trophic	5.026158							erks	5.150370	phosphatase	3.933436	priming	4.964288
							nfkb	5.290742							inactivate	5.237138	dephosphorylation	4.193395	polymorphonuclear	5.023367
							ebp	5.487609							p38mapk	5.265299	exogenous	4.200541	nadph	5.040461
							pp2a	5.590461							bid	5.292575	responsive	4.234047	fas	5.098958
							factor-2	5.836660							bim	5.321300	raf	4.261129	burst	5.140679
							ptp	5.907544							p53-dependent	5.331928	cytoki	4.277203	cytoki-induced	5.177258
							phosphothreoni	6.639521							ikappab	5.401338	transforming	4.285144	jak-stat	5.199821
															puma	5.453040	cytokis	4.303714	cytoki-mediated	5.224332
															tak1	5.519461	repression	4.322052	interleukin-8	5.229278
															bh3-only	5.661695	fibroblast	4.331056	receptor-associated	5.271742
															erk5	5.764615	phosphorylates	4.406083	enos	5.358043
															noxa	5.778740	gtpase	4.433422	vasodilation	5.382748
															p53-independent	5.804123	pdgf	4.510457	granulocyte-macrophage	5.458267
															mapk-mediated	5.864995	platelet-derived	4.548628	socs	5.680096
															ikks	5.885776	syrgistic	4.560501	guanylyl	6.634501
															nfkappab	6.059318	cooperation	4.586399
															i-kappab	6.297468	autophosphorylation	4.605562
																	3t3	4.605938
																	3t3	4.614457
																	phosphorylating	4.629249
																	erk2	4.739549
																	nih_3t3	4.815482
																	multifunctional	4.975273
																	pak	5.408967
																	ligand-dependent	5.412086
																	gefs	5.546678
																	ligand-independent	5.558472
																	swiss_3t3	5.788643
																	rap	6.014834
[truncated: 17 more columns]
